# Supplementary material for: Implementation constraints on natural climate solutions: A global literature review and survey
Source: Research Square preprint supplement (doi:10.21203/rs.3.rs-6890465/v1), 2025-07-04
Supplement: Supplementary file 1 [file 09723aa5cf42f21df7eecc73.pdf]

Supplementary Materials for  
**Implementation constraints on natural climate solutions: A global literature  
review and survey**

Timm Kroeger\* *et al.*

\*Corresponding author. Email: [tkroeger@tnc.org](mailto:tkroeger@tnc.org)

**This PDF file includes:**

Supplementary Text  
Figs. S1 to S21  
Tables S1 to S3  
Survey questionnaire

## Supplementary Text

### Constraint terminology and categorization

The literature on NCS constraints is inconsistent in both terminology and categorization. For example, what we term ‘constraint categories’ is variously referred to as ‘feasibility dimensions’<sup>1</sup>, ‘barriers and opportunities’<sup>2</sup>, ‘categories of enabling factors’<sup>3</sup> or ‘barriers’<sup>4</sup>, to name but a few. The classification of individual constraints into these categories and the thematic scope and terminology used for the categories themselves also show a considerable degree of diversity (Table S2). For example, Ref. 4 classifies ‘lack of credit access’ as a ‘technological’ barrier, while Ref. 3 classifies the somewhat broader ‘financial services’ as a ‘financial’ enabling factor, and Ref. 2 classifies ‘scale and accessibility of financing’ as a ‘socio-economic’ barrier or opportunity.

We classified the unique constraint observations from our systematic literature review and project survey into 46 constraints (Table 1). We developed these constraints iteratively through emergent coding, and the wording of each was chosen such that it encompasses the range of specific permutations of each constraint found in the reviewed papers (Table S1). We then grouped these constraints into eight categories (Table S2). *Market* constraints arise from a lack of, or a lack of access to markets (due to absence of markets or high transaction costs), or a lack of rentability of NCS (due to insufficient prices of NCS outputs, carbon, ecosystem services, or biodiversity). *Finance* constraints take the form of a lack of land manager or project access to financial resources or services (credit or insurance), or demanding reporting requirements associated with obtaining funding or financing for NCS. *Knowledge* constraints are caused by a lack of information (about the design, establishment, management, biophysical or economic performance, or climate mitigation, or on-site benefits of NCS, either in the scientific community or among land managers; or about market access), lack of technical advice, or lack of land managers’ ability to effectively implement the NCS (due to land manager limitations in terms of literacy, numeracy, or technological capacity). *Social and behavioral* constraints are caused by social norms, behaviors, preferences or attitudes (e.g., disinterest in or skepticism of NCS or of NCS promoters), lack of social learning or exchange networks, discrimination against certain groups, disagreement among actors or groups, equity concerns, or challenges in engaging or coordinating with relevant stakeholders. *Rules and laws* comprise legal or other formal principles that negatively affect NCS implementation, such as lack of secure tenure or resource management or use rights, regulatory barriers, lack of legal or policy clarity, insecure or uncertain benefit sharing; or incentives for competing land uses. *Government and organizations* can constrain NCS implementation through the behaviors (favoring non-NCS production, lack of enforcement of laws, policies, regulations, or contracts) or lack of coordination or implementation capacity of state or non-state entities, or through governments’ inability to prevent violent conflict or the threat of violence. *Material inputs* constraints arise from lack of needed NCS production inputs (e.g., seedlings, fertilizer, specialized tools), labor, water, or suitable land. Finally, *negative side effects* such as reductions in the yield of other crops (despite increased profitability of NCS), increased physical difficulty of land management, negative health impacts, property damage, or conflicts with wildlife or neighbors can constrain NCS implementation (Table S1). Despite some differences in the categorization and naming of select constraints, our classification is well-aligned with existing ones (Table S2).

### *Specific differences between our and others' constraint terminology and categorization*

Throughout this paper, the term 'constraint' refers to any of the 46 unique constraints that we developed through our combined *a priori* and emergent coding. Each of these constraints was developed iteratively to capture the often-diverse observations across journal articles that used different language to describe the same constraint. Due to differences in the description and interpretation of constraints observed in the literature, the classifications of all observed constraints were reviewed by at least three authors for consistency.

Below, we discuss how our constraint classification differs from those used in four other recent NCS studies<sup>1-4</sup>. Table S2 identifies congruence between individual constraints in our and the other classifications. The table shows broad alignment in terminology between our constraint categories and those of the other four studies. One notable difference is that we refer to 'knowledge' rather than 'technological' or 'technical' constraints because knowledge better captures the informational nature of some of the included constraints (e.g., lack of knowledge about NCS design, management, or performance; either in general or on the part of land managers). Furthermore, like Ref. 3 but unlike Ref. 2, Ref. 4 and Ref. 1, we distinguish between the formal or informal institutional frameworks of policies, laws, rules, and regulations that affect NCS implementation (our 'rules and laws' category), and the attitudes, behaviors or capacities of governmental or non-governmental entities (Government and organizations)—including attitudes, behaviors or capacities related to the implementation, or lack thereof, of policies, laws, rules or regulations – that constrain NCS implementation. We believe this distinction is useful and important as the actions needed to overcome these two categories of constraints are fundamentally different (effecting change in policies, laws, rules, regulations vs effecting change in the behavior or capacities of individuals or entities).

We do not discuss in detail the agreement or differences between each of our constraints and specific constraints in the other classifications. Rather, when one of our constraints is identical with, or substantively similar to, specific constraints in the other classifications, this is indicated in Table S2 by the same Arabic numerals (shown in parentheses). Where there is limited congruence, this is indicated by italicized Arabic numerals.

Ref. 3 categorizes NCS 'enabling factors' based on Ref. 5. While most of the 'enabling factors' identified in Ref. 3 are reflected in our constraints, some are not. The latter is due primarily to two factors: a substantive difference between Ref. 3's 'enabling factors' and our constraints, and differences in the parsing of constraints into their constituent components or sub-constraints.

Enabling factors as defined in Ref. 3 are conditions that are positively correlated with NCS implementation in the literature. In contrast, our constraints are factors that in the literature are reported as impeding NCS implementation. While in many cases Ref. 3's 'enabling factors' represent the inverse of constraints, this is not always true. For example, our classification does not include three of Ref. 3's 'biophysical' enabling factors (favorable climatic conditions, species diversity, and carbon stock potential). Since enabling factors as defined in Ref. 3 are conditions that are reported as being positively correlated with NCS implementation, it is not surprising that, for example, high potential carbon stocks or high biodiversity are positively correlated with NCS because of the potential income they might generate (carbon) or the financing they might attract (biodiversity). However, lower potential carbon stocks are not

necessarily a constraint on NCS implementation, because an NCS may deliver other desired outputs for potential implementers. Where low carbon stock potential is indeed identified in a paper as a constraint on NCS implementation, its negative effect on NCS implementation is captured by our constraints related to carbon market access or carbon prices. The same applies to biodiversity, lower levels of which may not necessarily prevent the attractiveness of an NCS to potential adopters – say, farmers or ranchers who consider agroforestry adoption for productivity gains, increased climate resilience, or carbon income. Where low biodiversity prevents the feasibility of an NCS project, it will do so via lack of access to biodiversity markets or low prices on those markets, two constraints we capture separately.

An example of a difference in parsing of constraints is Ref. 3's 'delivery of benefits' as an enabling factor, where delivery of benefits is defined as the sufficient size of overall benefits, or net welfare (i.e., not just financial) gains<sup>3</sup>. We do not have a corresponding inverse constraint 'lack of benefits' or 'insufficient benefits.' Rather, we have separate constraints for factors that individually or in combination may result in benefits that are insufficient to lead to NCS adoption, such as inadequate markets or prices for NCS products, carbon, biodiversity, or ecosystem services, or negative side effects (e.g., human-wildlife conflict or health or property damage as a result of NCS).

We also do not have direct equivalents for Ref. 3's social NCS enabling factors of IPLC engagement, stakeholder consultation, recognition of traditional values, and FPIC. Presence of these enabling factors during project design and implementation ensures appropriate local consultation and increases the likelihood that project designs meet local desires and preferences. While we do not explicitly account for the lack of these factors as constraints, their absence is likely to result in several of our 'social and behavioral' constraints, specifically, local preferences for non-NCS land uses, skepticism or disinterest in NCS or lack of trust in NCS promoters; lack of opportunity to participate in or influence the implementation of NCS; and concerns over negative equity impacts.

Finally, there are some differences in categorizations between Ref. 3 and our analysis. For example, Ref. 3 classify lack of availability of qualified government personnel as an economic constraint (as explained in their paper, this is included as part of their "labor availability" constraint). We classify lack of government capacity under our Government and organizations category, specifically, the constraint 'lack of policy coordination or implementation capacity.'

Ref. 2's 'socio-economic barriers and opportunities' category includes finance mechanisms, funding, and incentives, which we capture in our markets and finance categories; risk and uncertainty, which we capture in our markets, knowledge and social and behavioral categories; impacts on poverty or food security, the latter of which we capture in our negative side effects category; and cultural values and social acceptance, which we bin into our social-behavioral category. IPCC's institutional barriers and opportunities include transparent and accountable governance (accounted for in our Government and organizations category), clear land tenure and land-use rights (our rules and laws category), and institutional capacity (our Government and organizations category). IPCC's ecological barriers and opportunities category includes land and water availability (in our material inputs category); uncertainties and differences in outcomes related to specific soil conditions, water availability, GHG reduction potential as well as natural variability and resilience (captured to various degrees in our knowledge category), and

adaptation and biodiversity benefits (captured in our knowledge category). Their technological barriers and opportunities category consists of monitoring, reporting, and verification (MRV) needs, which we capture in our finance category ('burdensome reporting requirements') and our knowledge category ('availability of technical advice for land managers'). In general, our substantially larger number of constraints is largely due to our finer parsing of constraints.

Ref. 4 identifies socio-cultural 'barriers' that comprise norms and values, knowledge and perception, and behavior 'sub-barriers,' with 'descriptions' of specific finer barriers within each sub-barrier. These barriers generally are captured in our knowledge and social-behavioral categories. Ref. 4's technological barriers include complexity (difficult to adopt activity; requiring high management skills), resources (access to specialized machinery, lack of transport infrastructure, lack of inputs, limited/no access to credit, limited extension facilities); and development (lack of MRV; larger uncertainties about benefits, limited understanding of land suitability; technological readiness). These are captured in our markets, finance, knowledge, and material inputs categories. Ref. 4's economic barriers include costs (unable to afford specialized machinery; large initial investment, expensive to deploy at a scale where there is large potential), income (potential for income decline due to trade-offs; transitional period with higher production costs and lower income; lack of incentives), and value (difficulty of monetizing non-market benefits/ES), most of which are captured in our markets category. Their institutional barriers include policy barriers (lack of policy support mechanism to set explicit incentives; lack of policy implementation; disinterest of policymakers) that we capture in our Government and organizations and rules and laws categories; governance barriers (lack of cross-sectoral responsibility sharing; top-down approach; coordination between stakeholders, lack of proper monitoring) some of which we capture in our Government and organizations category; and regulation-related barriers (counter-productive public policies and legislation; lack of standards and protocols to measure C sequestration) that we capture in our rules and laws category. Ref. 4's ethical barriers comprise challenges related to conflict (risks of land grabbing; equitable benefit sharing; social conflicts) and fairness (limited access of women and minority groups to resources and land; no consideration of the rights of Indigenous People and local communities) that we capture in our social-behavioral and rules and laws categories, and trade-offs (land availability and competition with other land uses; possible increase in food prices and compromise food security; negative effect on the environment), which we capture in our negative side effects category.

Ref. 1 identified macro-level 'feasibility indicators' to assess the country-level feasibility of terrestrial NCS for the world. Unavoidably, this resulted in the selection of indicators characterized by geographically broad data availability. Some of Ref. 1's indicators are fairly similar to ours, while others represent country-wide characteristics that arguably are positively related to NCS feasibility but whose absence doesn't directly translate into specific constraints (e.g., GDP per capita, agricultural value added, personal rights, agricultural total factor productivity, or ease of doing business).

### **Recoding of Brumberg et al.'s<sup>6</sup> constraints**

The literature portion of our dataset utilizes Ref. 6's systematic review. However, we use 46 constraints in our analysis while Ref. 6 used 39. In most cases, the constraints used in Ref. 6

match ours verbatim or in meaning. Where this was not the case, we full-text reviewed the respective studies to ensure correct recoding to our constraints. Specifically, observations for the following constraints in Ref. 6 were recoded as described below:

*Ineffective laws, policies and regulations:* In most cases, these challenges represented instances of *lack of policy coordination or implementation capacity* or of *unclear laws and policies related to NCS outputs/markets* and were recoded to our respective constraints.

*Lack of laws, policies and regulations:* In almost all cases, this constraint was recoded to *unclear laws and policies related to NCS outputs/markets*.

*Trade-offs with agriculture:* this recoded to either *Negative side effects of NCS* or *greater profitability of alternative land uses*, depending on whether the concern was that NCS reduced yield of the traditional (baseline) crop (even while it might yield new products) or overall farm-level net revenue, respectively.

*Trade-offs with other land uses:* All instances of this constraint described negative impacts on human health, property damage, increased complexity or difficulty of land management (that did not affect profitability), negative biodiversity impacts, conflict with neighbors, or conflict with wildlife attracted by the NCS and were recoded to our constraint category *Negative side effects of NCS*; or they referred to concern about potentially undesirable negative equity impacts, in which case they were recoded to our constraint *Concerns about negative equity impacts*.

*Corruption or lack of transparency:* in the relatively few cases where corruption was the challenge, we recoded to *NCS-related corruption*; in most cases, the issue was lack of transparency, specifically, lack of transparency that led to, or was feared to, result in inequitable outcomes. We coded those cases as *concerns over negative equity impacts of NCS*.

*Lack of political will for NCS:* this was recoded to *politically influential interests favoring non-NCS*.

*Insecure land tenure:* we distinguish between land ownership and the right to management of land assets, because the two do not always align (e.g., in several countries, land ownership does not convey the right to harvests planted trees), and recoded observations to the applicable tenure constraint.

*Human-wildlife conflict:* recoded to *Negative side effects of NCS* if the concern was that wildlife attracted by the NCS posed a risk to human health or property, or *Skepticism or disinterest in NCS or lack of trust in NCS promoters* if the concern was that wildlife was damaging and making questionable the feasibility of the NCS itself.

*Interpersonal conflict:* recoded to *Lack of dispute resolution* if the issue was disagreements over the NCS in question itself, or *difficulty identifying, engaging, or coordinating with relevant actors* if the inherent challenge was logistical in nature.

*Time lag in NCS benefits:* in all cases, the issue was that delayed benefits from NCS negatively affected the expected profitability of NCS, so we recoded this to *greater profitability of alternative land uses*.

Brumberg et al. <sup>6</sup> combined several NCS pathways that had low observation counts in their analysis: AWC and CWR; PeR and APC; and AGC and GrR, respectively. Because of the higher observation count in the combined literature and survey data, we considered each of these pathways individually and recoded the papers featuring these pathways to the appropriate pathway.

### **Questionnaire development and distribution**

The survey flier with links to the English, Spanish, French and Portuguese survey versions was distributed through their organizational networks by the authors and colleagues at The Nature Conservancy, Wildlife Conservation Society, World Resources Institute, Center for International Forestry Research (CIFOR) and World Agroforestry (ICRAF), Conservation International, Eden: People+Planet, Catholic Relief Services, EcoDecision, International Centre for Integrated Mountain Development, One Acre Fund, Heifer International, Foundation for Ecological Security, African Forest Forum, Ecoagriculture Partners, University of Florida at Gainesville, and University of Sao Paulo. The survey also was promoted and the survey flier included in several editions of the Restor ([www.restor.eco](http://www.restor.eco)) and Nature4Climate (<https://nature4climate.org>) online newsletters. It included a free and prior informed consent (FPIC) statement, did not collect private or sensitive information, and was approved under The Nature Conservancy's Human Subjects Research policy. Respondents had the option to remain anonymous.

Upon reviewing the FPIC script and agreeing to participate, respondents were asked to provide optional demographic information, organizational affiliation and position title, with space to record multiple respondents; describe the project for which they were completing the questionnaire (name; country; additional location information, with the option of using a map widget; size, start and end year, if any); identify the land ownership and land management types, respectively (government, private individual, private company, non-governmental organization, indigenous community, other local community, other); identify the NCS pathways and sub-pathways implemented (multiple selection); and indicate whether the project was pursuing, or had interest in pursuing in the future, carbon crediting and, if so, on which registry or market (multiple selection). Next, respondents were asked to select from the provided full list of constraints (Table 1) all that made it challenging to achieve the full project objectives ("Applies to my project"; "Does not apply..."; "Unsure"), with the option of writing in additional constraints. They were then presented with a list of the constraints they had selected or written in, and asked to rank the five most important ones, with "1" being the most important, "2" being the second-most important and so on. This was followed by drill-down questions for the identified top-five constraints that asked respondents to identify (1) the specific nature of the constraints as either lack of, or uncertainty about, "availability" or "quality"; uncertain or high "cost" of inputs; or uncertain or low "price" for marketed NCS outputs (Yes, No, Unsure); and (2) whether the constraint primarily affects land managers, project staff, the local community or government(s), district/county or state/province government(s), or national ministries or departments (as relevant to a given constraint) (multiple selection). Next, respondents were asked to identify key actions that they thought could address each of the top-five constraints and by whom, and whether any of these actions were currently being implemented or efforts were underway to do so. Respondents were then asked what they believed the ten-year scaling potential of their project to be if key constraints were addressed (single selection: unsure, none, double, triple, quadruple, more than quintuple in size). Finally, they were again presented with the full list of 46 constraints and asked to identify up to ten that currently are most important in preventing the scaling of their project.

### **Geocoding and data analysis**

All data analysis was conducted in R<sup>7</sup> using the tidyverse, dplyr, and ggplot2 packages.

## References

1. Roe, S. *et al.* Land-based measures to mitigate climate change: Potential and feasibility by country. *Global Change Biology* **27**, 6025–6058 (2021).
2. Agriculture, Forestry and Other Land Uses (AFOLU). Contribution of Working Group III to the Sixth Assessment Report of the Intergovernmental Panel on Climate Change. in *Climate Change 2022 - Mitigation of Climate Change*. (ed. Intergovernmental Panel On Climate Change (IPCC)) 747–860 (Cambridge University Press, 2023). doi:10.1017/9781009157926.009.
3. Schulte, I., Eggers, J., Nielsen, J. Ø. & Fuss, S. What influences the implementation of natural climate solutions? A systematic map and review of the evidence. *Environ. Res. Lett.* **17**, 013002 (2022).
4. Karki, L. *et al.* Potentials and barriers to land-based mitigation technologies and practices (LMTs)—a review. *Environ. Res. Lett.* **18**, 093003 (2023).
5. Intergovernmental Panel on Climate Change. *Climate Change 2014: Mitigation of Climate Change: Working Group III Contribution to the IPCC Fifth Assessment Report*. (Cambridge University Press, 2015). doi:10.1017/CBO9781107415416.
6. Brumberg, H. *et al.* Global Analysis of Constraints to Natural Climate Solution Implementation. *PNAS Nexus* **In press**.
7. R Core Team. R: A Language and Environment for Statistical Computing. R Foundation for Statistical Computing (2023).
8. Appleton, M. R. *et al.* Protected area personnel and ranger numbers are insufficient to deliver global expectations. *Nat Sustain* **5**, 1100–1110 (2022).



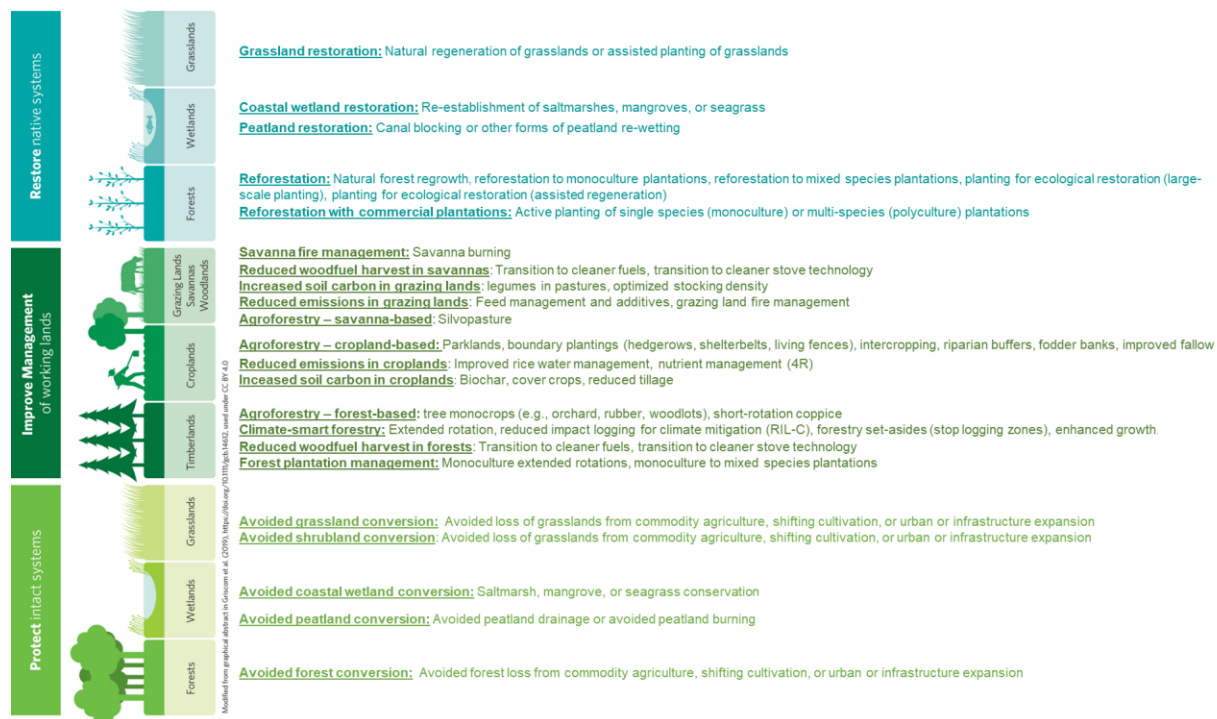

**Fig. S1. List of Natural Climate Solutions pathways (shown in boldface and underlined) and sub-pathways included in the survey, by NCS strategy (protect, restore, improve management) and biome (forests, wetlands, grasslands).**

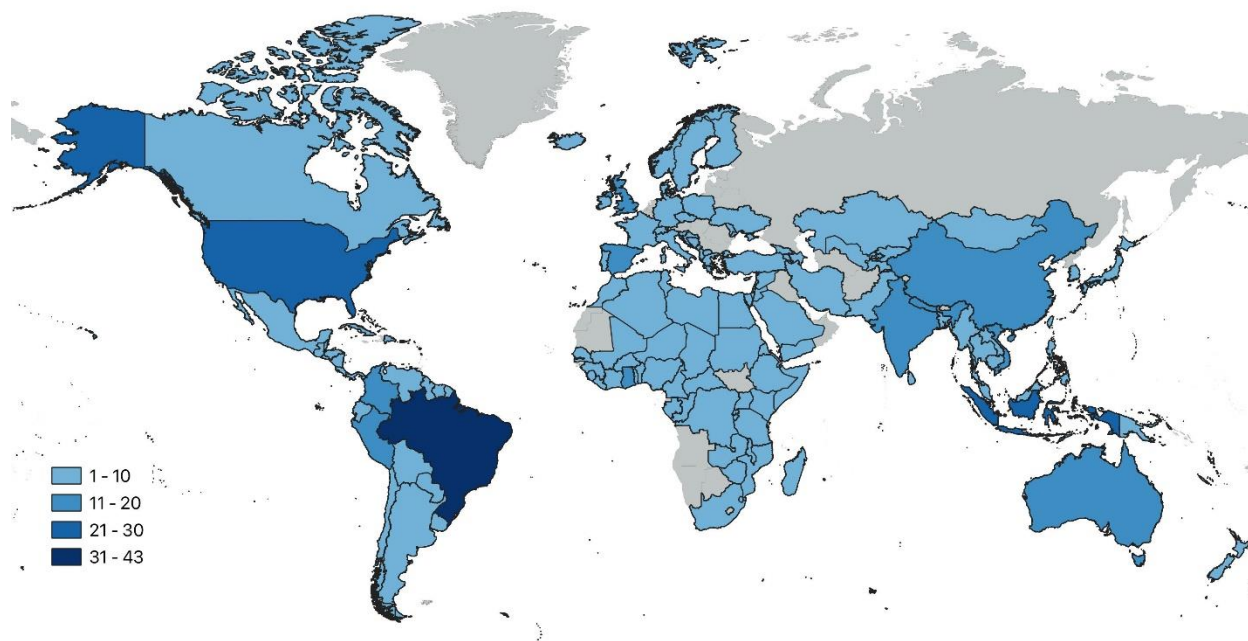

**Fig. S2. Number of papers included in the analysis, by country.**

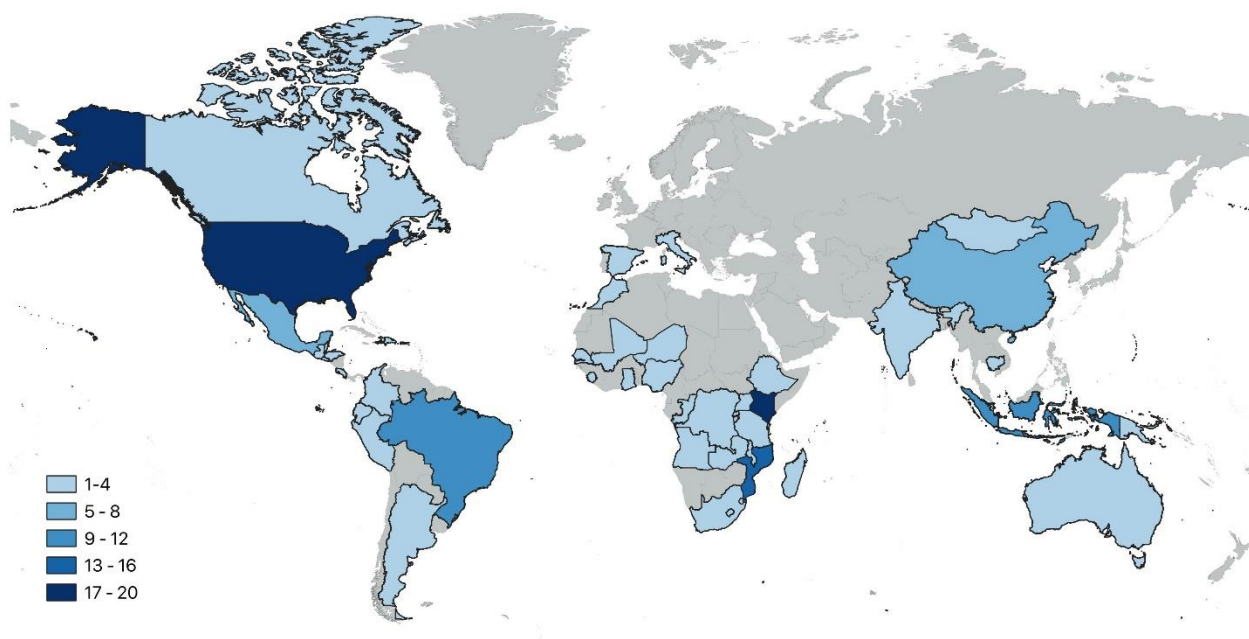

**Fig. S3. Number of survey projects by country.**

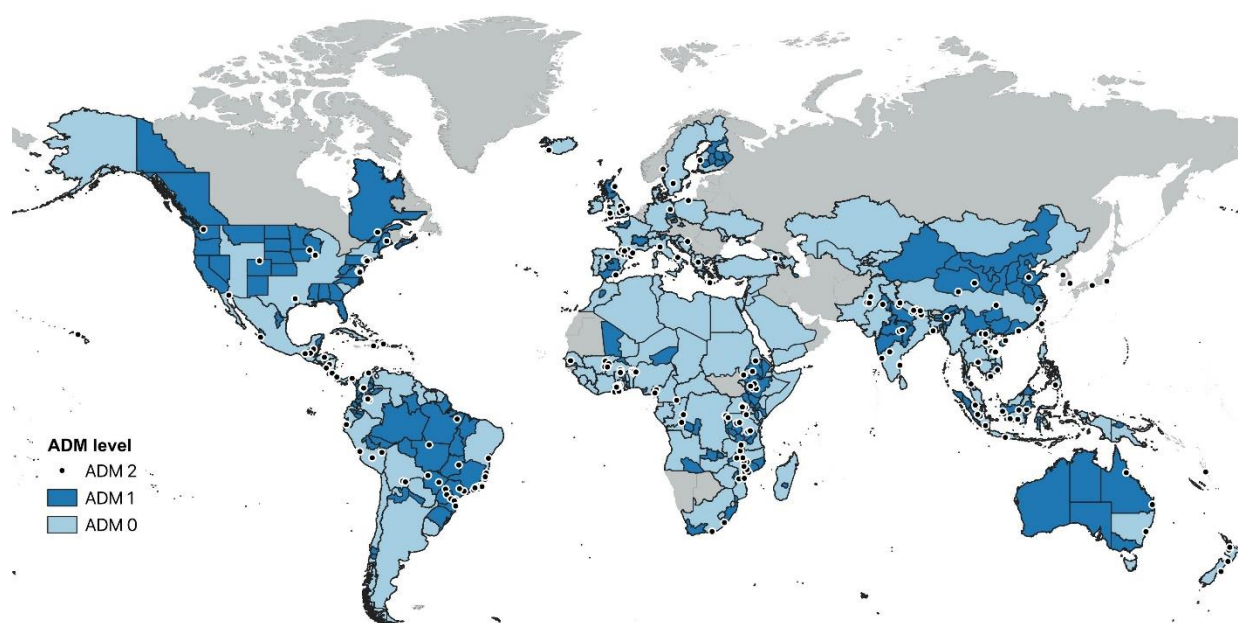

**Fig. S4. Administrative (ADM) units covered by papers and survey projects, by administrative level. Map does not show number of papers or projects in an administrative unit.**

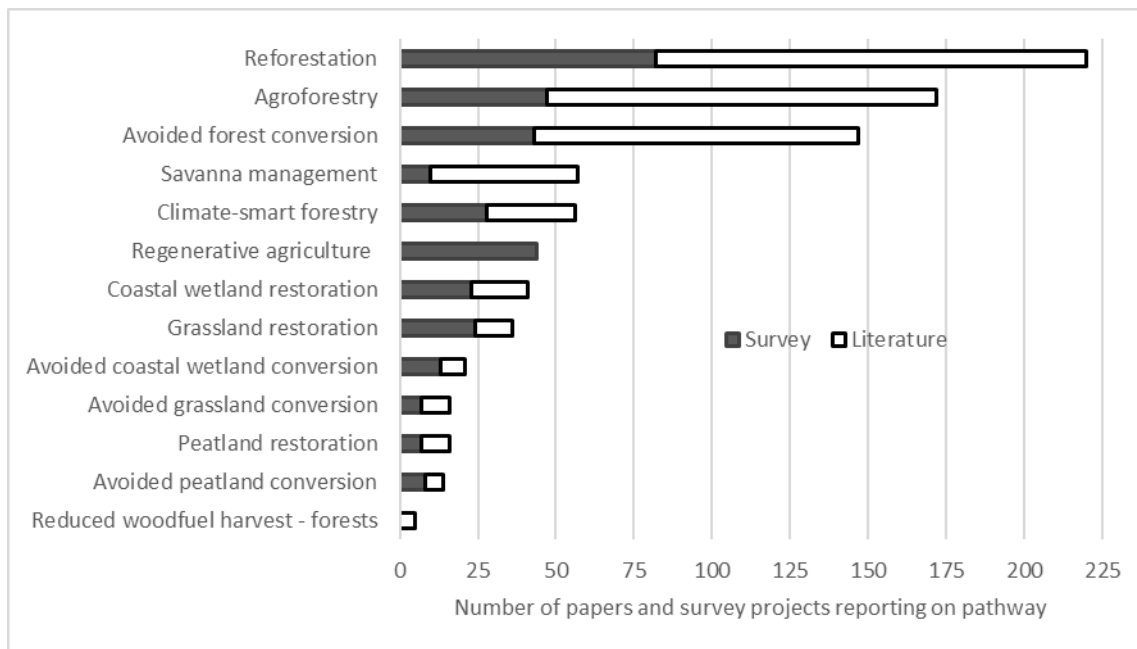

**Fig. S5. Number of papers and survey projects reporting on each pathway.**

| Sub-region                | NCS_Pathway | Savanna management | Regenerative agriculture | Reforestation | Reduced woodfuel/harvest-forests | Peatland restoration | Grassland restoration | Coastal wetland restoration | Climate-smart forestry | Avoided peatland conversion | Avoided grassland conversion | Avoided forest conversion | Avoided coastal wetland conversion | Agroforestry | Sub-region |       | Regional share |
|---------------------------|-------------|--------------------|--------------------------|---------------|----------------------------------|----------------------|-----------------------|-----------------------------|------------------------|-----------------------------|------------------------------|---------------------------|------------------------------------|--------------|------------|-------|----------------|
|                           |             |                    |                          |               |                                  |                      |                       |                             |                        |                             |                              |                           |                                    |              | Total      | Share |                |
| Northern America          |             | 6                  | 3                        | 22            |                                  | 3                    | 4                     | 6                           | 11                     | 3                           | 7                            | 7                         | 3                                  | 8            | 83         | 9%    | 36%            |
| Central America           |             | 6                  | 6                        | 16            |                                  |                      | 1                     | 3                           | 3                      | 1                           |                              | 20                        | 4                                  | 13           | 73         | 8%    |                |
| South America             |             | 15                 | 3                        | 45            | 1                                | 3                    | 9                     | 2                           | 2                      | 1                           | 2                            | 41                        | 2                                  | 24           | 150        | 17%   |                |
| Caribbean                 |             | 1                  | 1                        | 3             |                                  |                      | 1                     | 2                           | 1                      |                             |                              | 1                         | 1                                  | 5            | 16         | 2%    |                |
| Western Asia              |             | 2                  |                          | 2             |                                  |                      |                       | 1                           |                        |                             |                              |                           | 1                                  | 2            | 8          | 1%    | 21%            |
| Central Asia              |             |                    |                          | 1             |                                  |                      |                       |                             |                        |                             |                              |                           |                                    | 1            | 2          | 0%    |                |
| Eastern Asia              |             | 2                  | 1                        | 20            |                                  |                      | 1                     | 5                           | 2                      |                             | 1                            | 6                         | 2                                  | 3            | 43         | 5%    |                |
| South-Eastern Asia        |             | 2                  |                          | 16            |                                  | 6                    |                       | 6                           | 1                      | 7                           |                              | 22                        | 5                                  | 21           | 86         | 10%   |                |
| Southern Asia             |             |                    | 2                        | 12            | 1                                |                      | 1                     | 2                           | 5                      |                             |                              | 8                         | 2                                  | 14           | 47         | 5%    |                |
| Melanesia                 |             |                    |                          | 1             |                                  |                      |                       | 3                           |                        |                             |                              | 1                         | 2                                  | 1            | 8          | 1%    |                |
| Australia and New Zealand |             | 1                  | 1                        | 7             |                                  |                      | 1                     | 4                           | 2                      |                             | 2                            | 4                         | 2                                  | 3            | 27         | 3%    | 4%             |
| Northern Africa           |             | 3                  | 1                        | 3             |                                  |                      |                       | 1                           | 1                      |                             |                              | 2                         | 1                                  | 3            | 15         | 2%    | 30%            |
| Western Africa            |             | 5                  | 6                        | 19            | 1                                |                      | 1                     | 1                           | 6                      | 1                           | 1                            | 10                        | 1                                  | 20           | 72         | 8%    |                |
| Eastern Africa            |             | 11                 | 15                       | 33            | 1                                |                      | 9                     | 11                          | 8                      | 1                           | 1                            | 23                        | 4                                  | 38           | 155        | 17%   |                |
| Central Africa            |             | 1                  |                          | 4             |                                  |                      |                       |                             | 2                      | 2                           |                              | 4                         | 1                                  | 4            | 18         | 2%    |                |
| Southern Africa           |             | 1                  |                          | 2             |                                  |                      | 2                     | 1                           |                        |                             |                              |                           |                                    | 1            | 7          | 1%    |                |
| Northern Europe           |             | 2                  |                          | 17            |                                  | 4                    | 2                     | 1                           | 5                      |                             | 1                            |                           |                                    | 3            | 35         | 4%    | 10%            |
| Western Europe            |             | 2                  |                          | 6             |                                  |                      | 2                     |                             | 1                      |                             | 1                            | 1                         |                                    | 6            | 19         | 2%    |                |
| Eastern Europe            |             | 1                  |                          | 3             |                                  |                      |                       |                             | 1                      |                             |                              | 2                         |                                    | 1            | 8          | 1%    |                |
| Southern Europe           |             | 6                  | 2                        | 7             | 1                                |                      | 2                     |                             | 2                      |                             | 1                            | 3                         |                                    | 6            | 30         | 3%    |                |

**Fig. S6. Number of papers and survey projects by subregion and pathway.** A paper or survey project that covers more than one pathway, subregion, or location within a subregion results in multiple counts in this table. Grey shading indicates no data. A survey or paper that reports on more than one sub-pathway belonging to the same pathway is counted as a single observation (e.g., mangrove restoration and saltmarsh restoration are two sub-pathways of the pathway ‘coastal wetland restoration’).

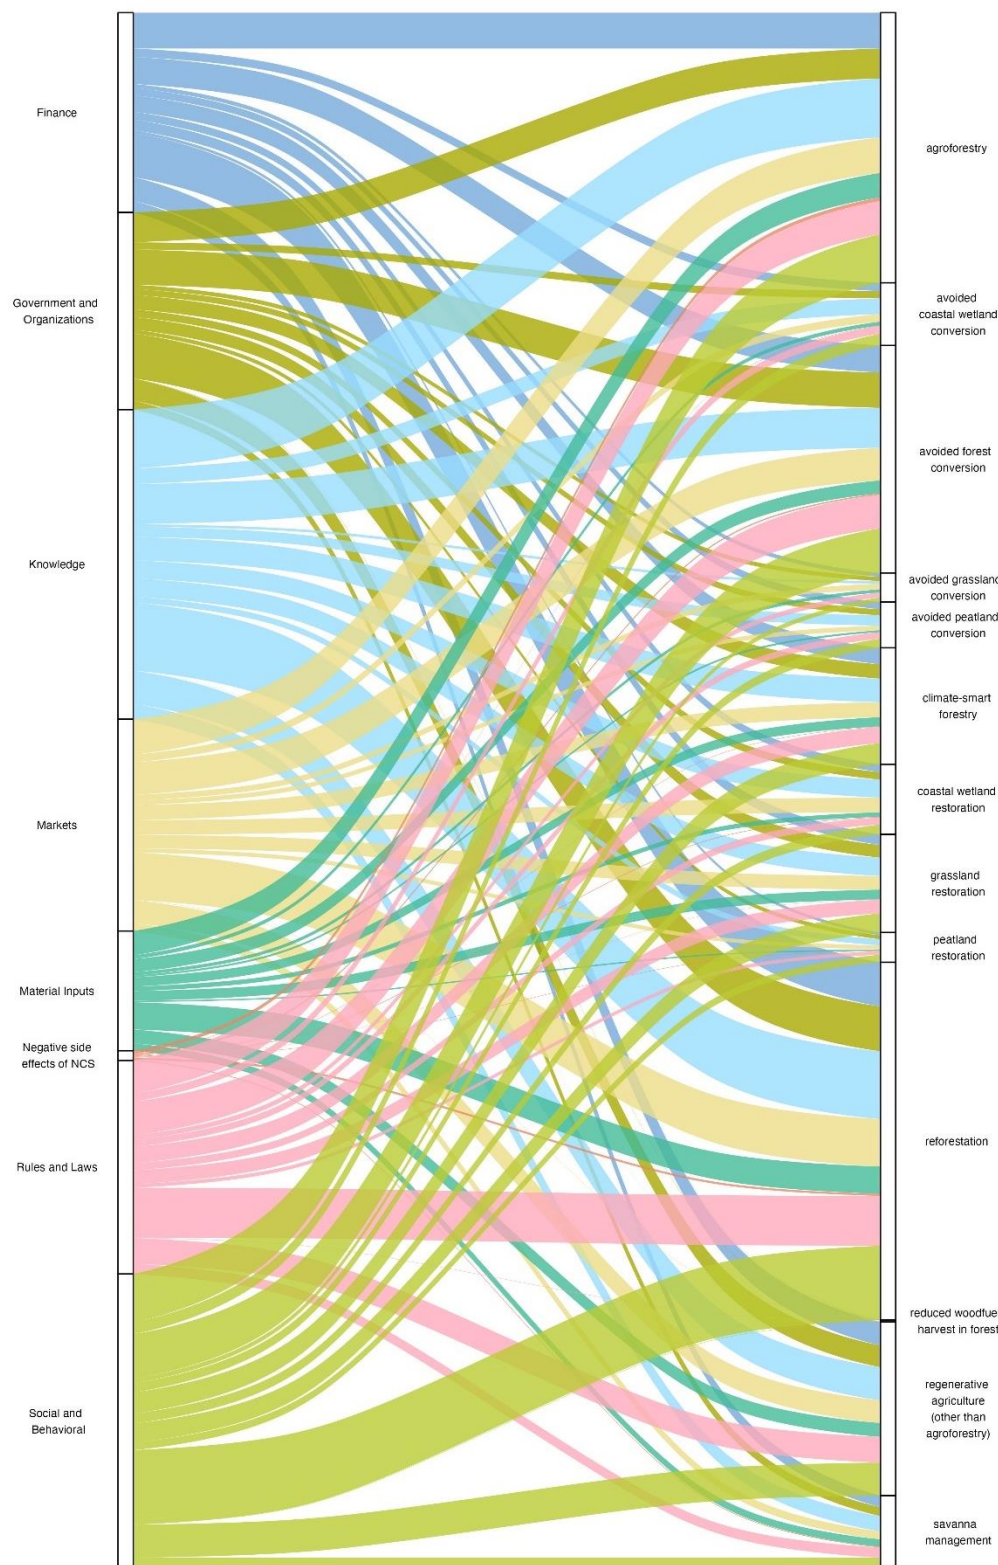

**Fig. S7. Alluvial diagram showing the distribution of observations for each constraint category across pathways and the composition of constraint category observations for each pathway.**



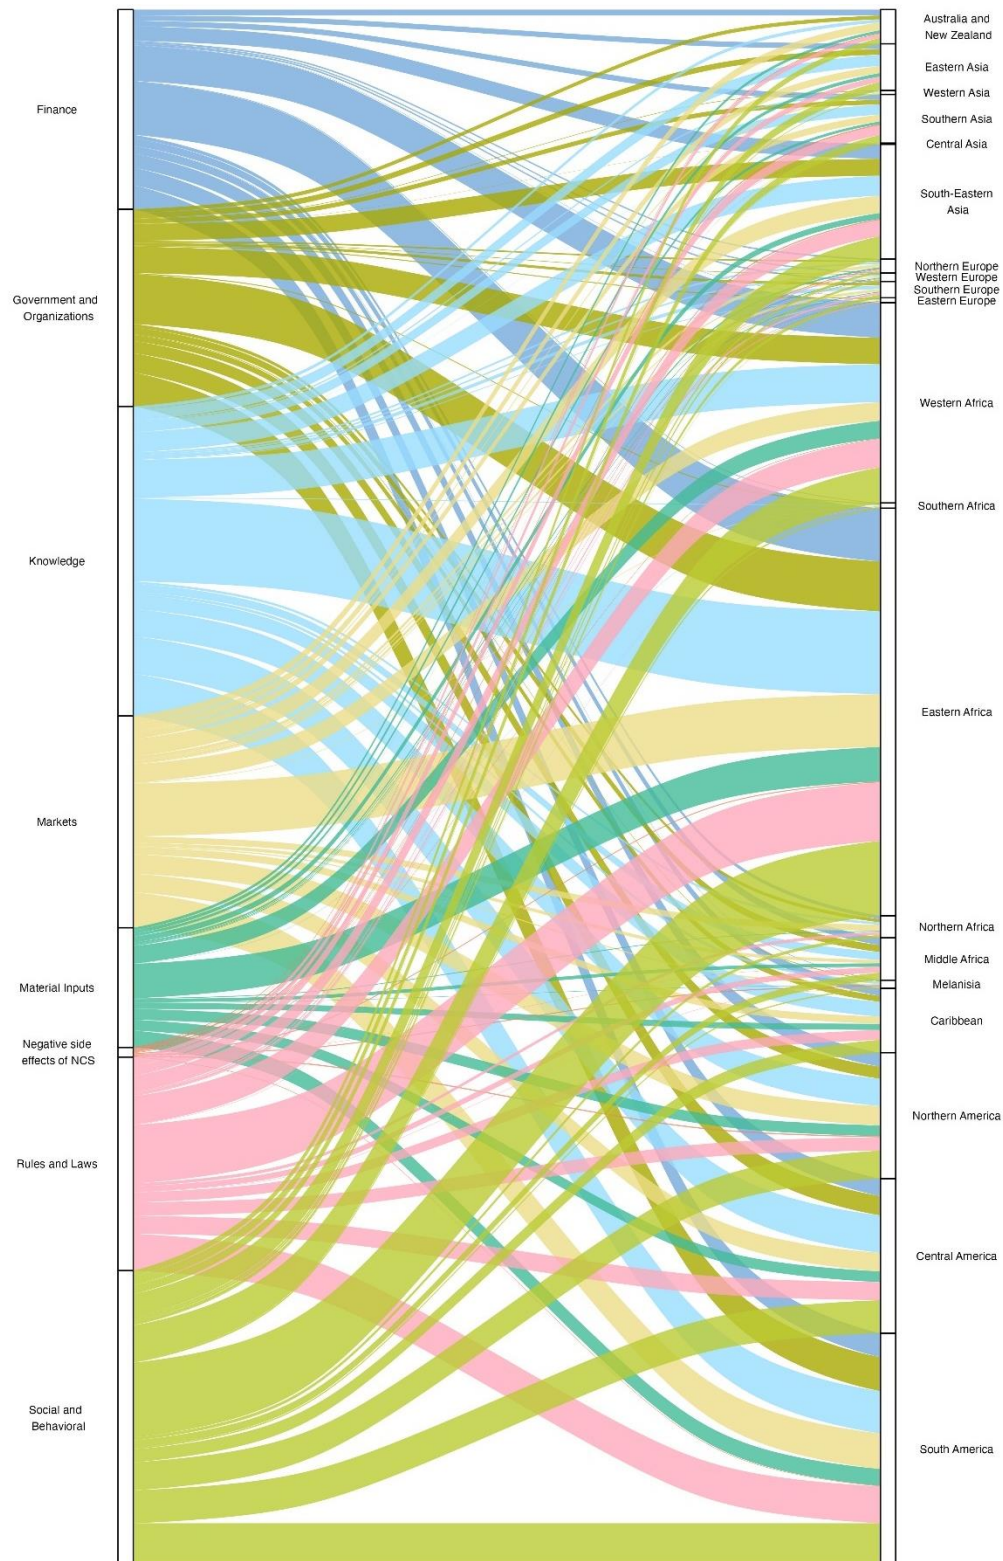

**Fig. S8. Alluvial diagram showing the distribution of observations for each constraint category across subregions and the composition of constraint category observations for each subregion.**



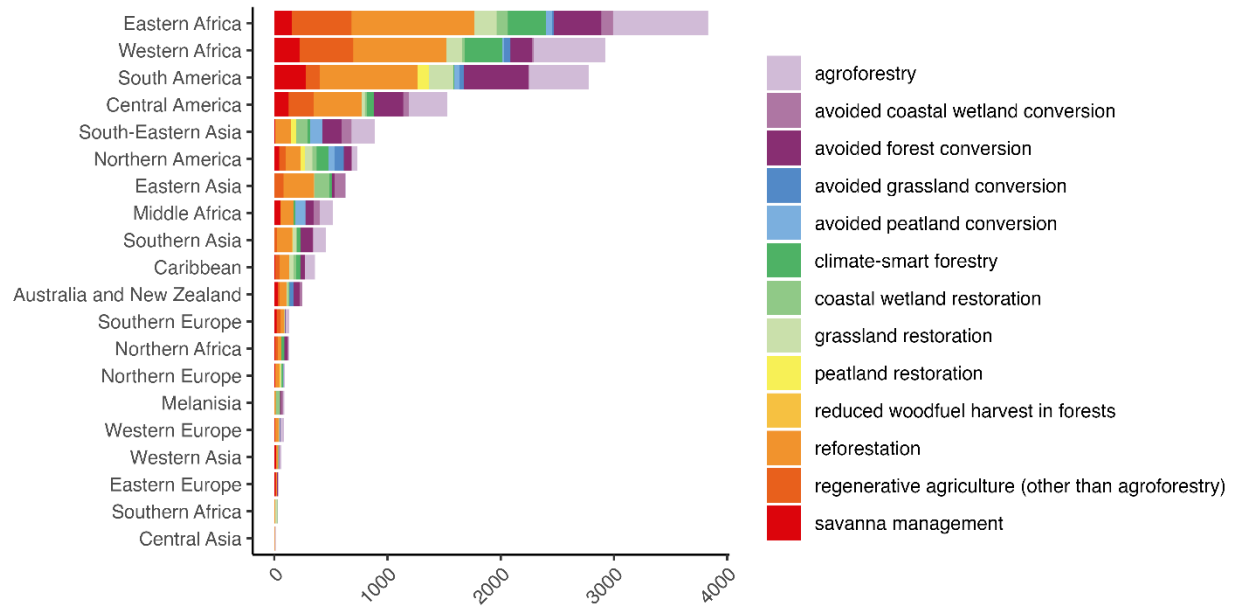

**Fig. S9. Subregional distribution of constraint observations by NCS pathway.** Nearly one-half (48%) of the 15,572 constraint observations in our dataset are from Africa, with the vast majority of these from Eastern (25%) and Western (19%) Africa (Fig. S16). South (18%) and Central (10%) America account for the next-largest shares of observations, followed by South-Eastern Asia (6%), Northern America (5%) and Eastern Asia (4%). Europe (all subregions combined), Australia-New Zealand, and Melanesia each account for only 2% of all observations. Reforestation is the pathway with the highest number of constraint observations in 15 of the 20 subregions. In all subregions except Australia-New Zealand and Melanesia, agroforestry contributes the second-highest number of constraint observations. Avoided forest conversion represents the third-largest number of observations in the Americas and Asia, but not in Africa, where regenerative agriculture and climate-smart forestry contribute the third and fourth-largest sets of observations, respectively. Notably, there are information gaps in the evidence base for some pathways in several subregions (Fig. S10).

|                           | Savanna management | Regenerative agriculture (excl. agroforestry) | Reforestation | Reduced woodfuel harvest in forests | Peatland restoration | Grassland restoration | Coastal wetland restoration | Climate-smart forestry | Avoided peatland conversion | Avoided grassland conversion | Avoided forest conversion | Avoided coastal wetland conversion | Agroforestry | Subregion |       | Regional |
|---------------------------|--------------------|-----------------------------------------------|---------------|-------------------------------------|----------------------|-----------------------|-----------------------------|------------------------|-----------------------------|------------------------------|---------------------------|------------------------------------|--------------|-----------|-------|----------|
| Subregion                 |                    |                                               |               |                                     |                      |                       |                             |                        |                             |                              |                           |                                    |              | Total     | Share | share    |
| Northern America          | 43                 | 55                                            | 135           |                                     | 38                   | 64                    | 40                          | 105                    | 53                          | 80                           | 64                        | 11                                 | 42           | 730       | 5%    | 35%      |
| Central America           | 127                | 218                                           | 428           |                                     |                      | 26                    | 22                          | 57                     | 1                           |                              | 259                       | 49                                 | 340          | 1527      | 10%   |          |
| South America             | 278                | 122                                           | 862           | 3                                   | 100                  | 214                   | 5                           | 9                      | 44                          | 39                           | 568                       | 5                                  | 527          | 2776      | 18%   |          |
| Caribbean                 | 6                  | 39                                            | 83            |                                     |                      | 39                    | 23                          | 39                     |                             |                              | 39                        | 2                                  | 88           | 358       | 2%    |          |
| Western Asia              | 15                 |                                               | 14            |                                     |                      |                       | 8                           |                        |                             |                              |                           | 8                                  | 15           | 60        | 0%    | 13%      |
| Central Asia              |                    |                                               | 4             |                                     |                      |                       |                             |                        |                             |                              |                           |                                    | 8            | 12        | 0%    |          |
| Eastern Asia              | 2                  | 80                                            | 277           |                                     |                      | 2                     | 130                         | 22                     |                             | 1                            | 28                        | 88                                 | 7            | 637       | 4%    |          |
| Southern Asia             |                    | 21                                            | 137           | 2                                   |                      | 34                    | 6                           | 32                     |                             |                              | 105                       | 6                                  | 110          | 453       | 3%    |          |
| South-Eastern Asia        | 7                  |                                               | 139           |                                     | 48                   |                       | 100                         | 22                     | 107                         |                              | 170                       | 90                                 | 205          | 888       | 6%    | 2%       |
| Australia and New Zealand | 33                 | 14                                            | 59            |                                     |                      | 14                    | 10                          | 5                      |                             | 36                           | 50                        | 23                                 | 4            | 248       | 2%    |          |
| Melanesia                 |                    |                                               | 12            |                                     |                      |                       | 39                          |                        |                             |                              | 12                        | 13                                 | 12           | 88        | 1%    |          |
| Northern Africa           | 10                 | 24                                            | 26            |                                     |                      |                       | 4                           | 24                     |                             |                              | 30                        | 4                                  | 10           | 132       | 1%    | 48%      |
| Western Africa            | 220                | 478                                           | 822           | 1                                   |                      | 136                   | 25                          | 331                    | 18                          | 56                           | 186                       | 18                                 | 630          | 2921      | 19%   |          |
| Eastern Africa            | 152                | 530                                           | 1084          | 2                                   |                      | 195                   | 101                         | 337                    | 54                          | 14                           | 419                       | 103                                | 839          | 3830      | 25%   |          |
| Central Africa            | 54                 |                                               | 116           |                                     |                      |                       |                             | 16                     | 88                          |                              | 74                        | 54                                 | 117          | 519       | 3%    |          |
| Southern Africa           | 3                  |                                               | 3             |                                     |                      | 20                    | 1                           |                        |                             |                              |                           |                                    | 2            | 29        | 0%    | 2%       |
| Northern Europe           | 6                  |                                               | 40            |                                     | 8                    | 8                     | 4                           | 14                     |                             | 1                            |                           |                                    | 11           | 92        | 1%    |          |
| Western Europe            | 4                  |                                               | 37            |                                     |                      | 3                     |                             | 4                      |                             | 2                            | 5                         |                                    | 31           | 86        | 1%    |          |
| Eastern Europe            | 12                 |                                               | 9             |                                     |                      |                       |                             | 1                      |                             |                              | 7                         |                                    | 12           | 41        | 0%    |          |
| Southern Europe           | 19                 | 34                                            | 33            | 3                                   |                      | 4                     |                             | 2                      |                             | 1                            | 5                         |                                    | 32           | 133       | 1%    |          |

**Fig. S10. Heatmap of regional and subregional constraint observation counts by pathway.**

Each cell shows the number of constraint-pathway-location observations for a pathway in that subregion. Grey shading indicates no data for a pathway in a subregion.

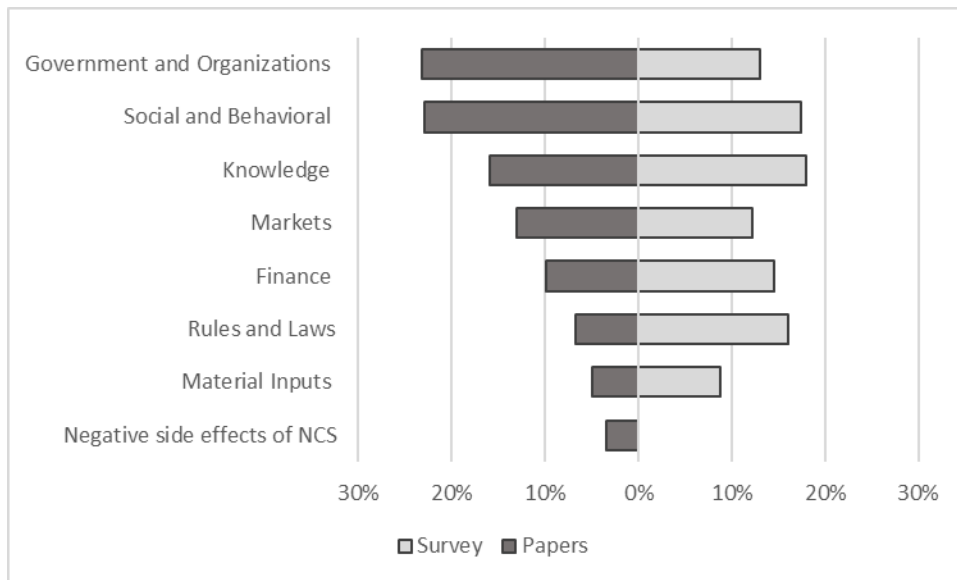

**Fig. S11. Percent distribution of constraint categories reported in the literature and survey data, respectively.**

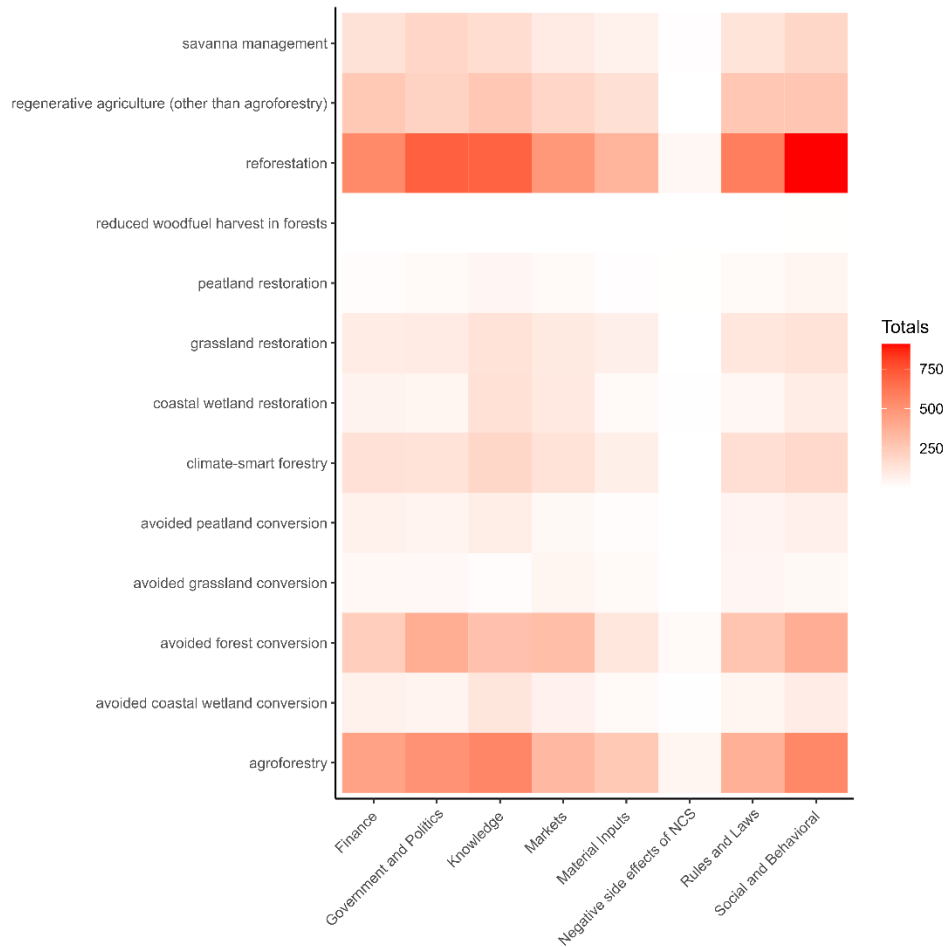

**Fig. S12. Frequency counts of constraint-pathway-location observations by pathway and constraint category.** Reforestation (27.7%), agroforestry (19.6%), avoided forest conversion (13.0%) and regenerative agriculture (other than agroforestry; 10.4%) are the pathways with the largest numbers of constraint observations. Reforestation also accounts for the most observations in all constraint categories except *Negative side effects*, contributing 25%-31% of the total frequency counts in each category, followed by agroforestry, which accounts for 34% of observations of *Negative side effects* and 17%-21% of observations in the other constraint categories.

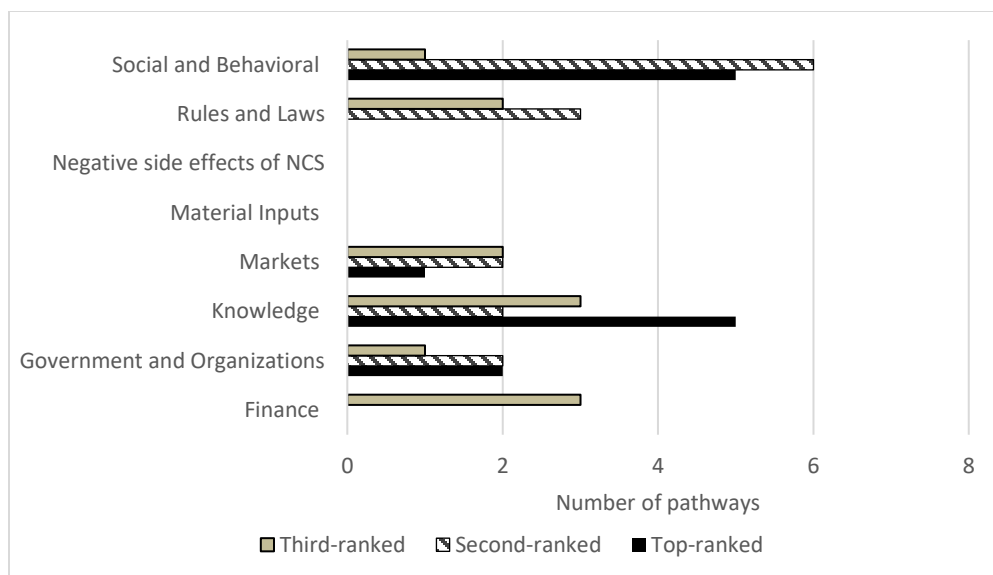

**Fig. S13. Number of times each constraint category was the top, second or third-highest-ranking category for an NCS pathway.**

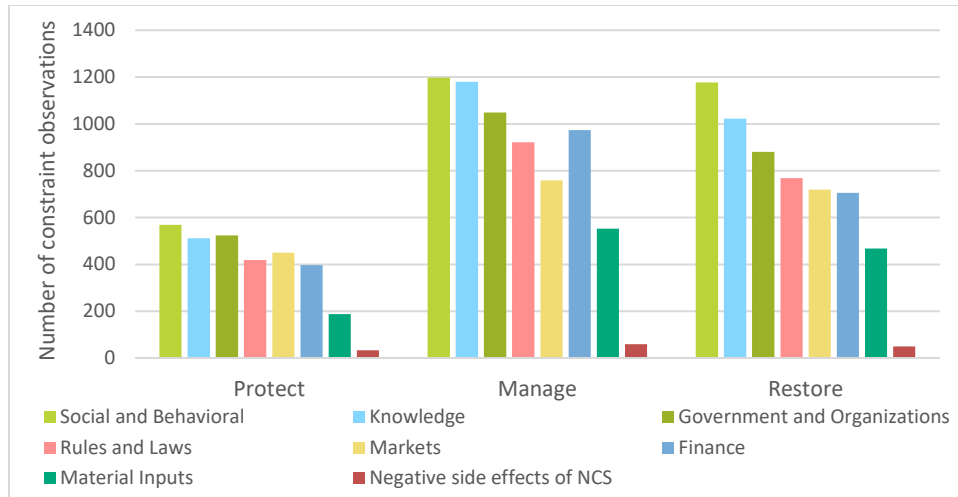

**Fig. S14. Ranking of constraint categories by NCS strategy (Protect, Manage, Restore).**

While *Knowledge* is the most frequently top-ranking constraint category at the individual pathway level and across NCS strategies and the most often top-ranking category for both improved management and protection strategies, *Social-behavioral* is the top-ranking constraint category for three out of four restoration pathways. Within the knowledge category, *information about how to design or begin the NCS* is the top or tied top individual constraint for half of the restoration pathways and half of the protection pathways, but not for any improved management pathway, although it is the second-ranking constraint for climate-smart forestry. *Government and organizations* is the top-ranking constraint category for one improved management and protection pathway each. However, while *Government and organizations* is a top constraint category for only two pathways, *lack of policy coordination or implementation capacity* is the top individual constraint for all improved management pathways if the small-sample (n=5 papers or survey responses) reduced woodfuel harvest in forests pathway is excluded. It also is the top or tied top constraint for three out of four restoration pathways. *Uncertain, or lack of, enforcement of environmental laws*, also in the *Government and organizations* category, is the second-highest ranking individual constraint for two of the four protection pathways, underscoring the important role of lack of enforcement in environmental conservation

8.

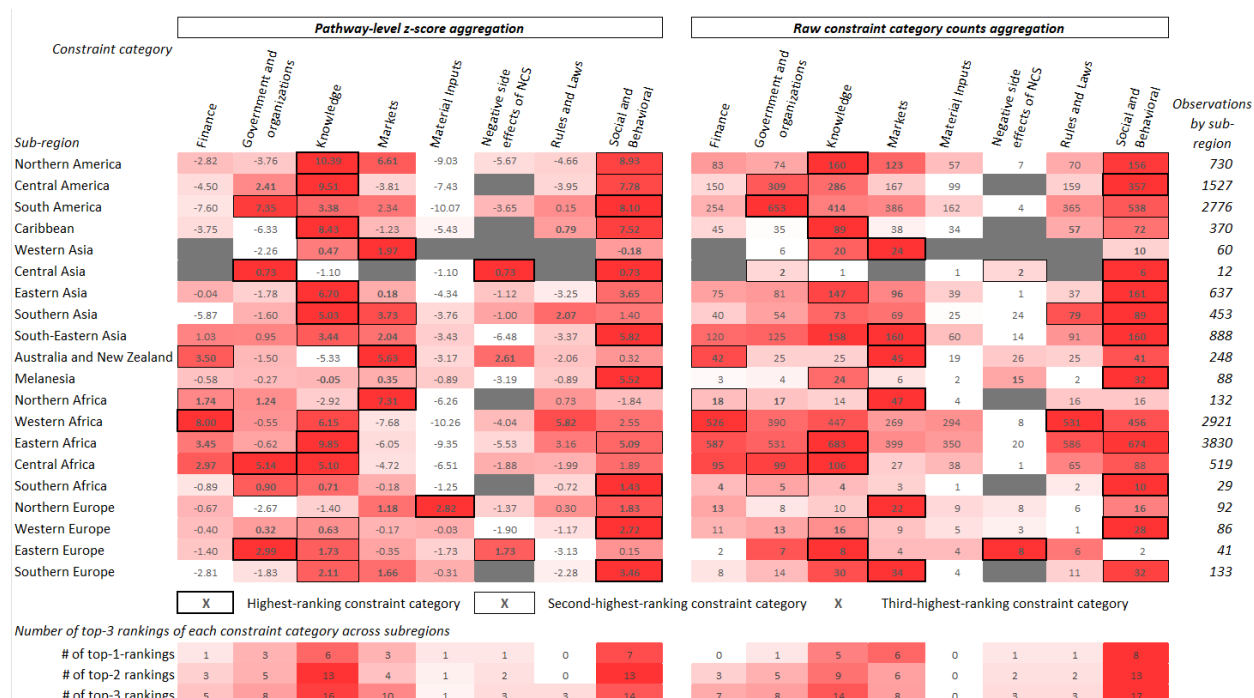

**Fig. S15. Heatmaps showing the relative prevalence of observations by constraint category and subregion using two different aggregation approaches.** Top left panel shows summed pathway-level z-scores for each constraint category in each subregion. Top right panel shows total raw counts of observations for each constraint category for all pathways in each subregion. Top-three-ranking categories in each subregion are shown in bold. Top and second-ranking categories in each subregion are indicated by thick and thin borders, respectively. Each panel is color-coded at the subregion level, with darkened shading indicating more frequently observed constraint categories. Grey shading indicates no data. Bottom panels show the number of times each constraint category was top, top two, or top three-ranking across all subregions, for pathway-level z-score aggregation (left) and summed raw constraint observations (right), and are color-coded by row in each panel, with darker shading indicating higher numbers of top rankings. Six of the 20 subregions have identical rankings of the top three constraint categories under both ranking approaches. A further eight have the same top three constraint categories under both approaches, but with different rankings. In the remaining six subregions, two out of the top three constraint categories are the same under both approaches (with the same or a different ranking) but there is a different third top-three constraint category.

| Constraint category       | Finance | Government and Organiz. | Knowledge | Markets | Material Inputs | Negative side effects of NCS | Rules and Laws | Social and Behavioral | Subregional share | Regional share |
|---------------------------|---------|-------------------------|-----------|---------|-----------------|------------------------------|----------------|-----------------------|-------------------|----------------|
| Sub-region                |         |                         |           |         |                 |                              |                |                       |                   |                |
| Northern America          | 83      | 74                      | 160       | 123     | 57              | 7                            | 70             | 156                   | 730               | 5%             |
| Central America           | 150     | 309                     | 286       | 167     | 99              |                              | 159            | 357                   | 1527              | 10%            |
| South America             | 254     | 653                     | 414       | 386     | 162             | 4                            | 365            | 538                   | 2776              | 18%            |
| Caribbean                 | 45      | 35                      | 89        | 38      | 34              |                              | 57             | 72                    | 370               | 2%             |
| Western Asia              |         | 6                       | 20        | 24      |                 |                              |                | 10                    | 60                | 0%             |
| Central Asia              |         | 2                       | 1         |         | 1               | 2                            |                | 6                     | 12                | 0%             |
| Eastern Asia              | 75      | 81                      | 147       | 96      | 39              | 1                            | 37             | 161                   | 637               | 4%             |
| Southern Asia             | 40      | 54                      | 73        | 69      | 25              | 24                           | 79             | 89                    | 453               | 3%             |
| South-Eastern Asia        | 120     | 125                     | 158       | 160     | 60              | 14                           | 91             | 160                   | 888               | 6%             |
| Australia and New Zealand | 42      | 25                      | 25        | 45      | 19              | 26                           | 25             | 41                    | 248               | 2%             |
| Melanesia                 | 3       | 4                       | 24        | 6       | 2               | 15                           | 2              | 32                    | 88                | 1%             |
| Northern Africa           | 18      | 17                      | 14        | 47      | 4               |                              | 16             | 16                    | 132               | 1%             |
| Western Africa            | 526     | 390                     | 447       | 269     | 294             | 8                            | 531            | 456                   | 2921              | 19%            |
| Eastern Africa            | 587     | 531                     | 683       | 399     | 350             | 20                           | 586            | 674                   | 3830              | 25%            |
| Central Africa            | 95      | 99                      | 106       | 27      | 38              | 1                            | 65             | 88                    | 519               | 3%             |
| Southern Africa           | 4       | 5                       | 4         | 3       | 1               |                              | 2              | 10                    | 29                | 0%             |
| Northern Europe           | 13      | 8                       | 10        | 22      | 9               | 8                            | 6              | 16                    | 92                | 1%             |
| Western Europe            | 11      | 13                      | 16        | 9       | 5               | 3                            | 1              | 28                    | 86                | 1%             |
| Eastern Europe            | 2       | 7                       | 8         | 4       | 4               | 8                            | 6              | 2                     | 41                | 0%             |
| Southern Europe           | 8       | 14                      | 30        | 34      | 4               |                              | 11             | 32                    | 133               | 1%             |

**Fig. S16. Heatmap showing number of observations in each constraint category by subregion.** Each cell shows the number of constraint-pathway-location observations for a constraint category in that subregion. Color-coding identifies subregion-constraint category combinations with the highest counts overall. Grey shading indicates no data.



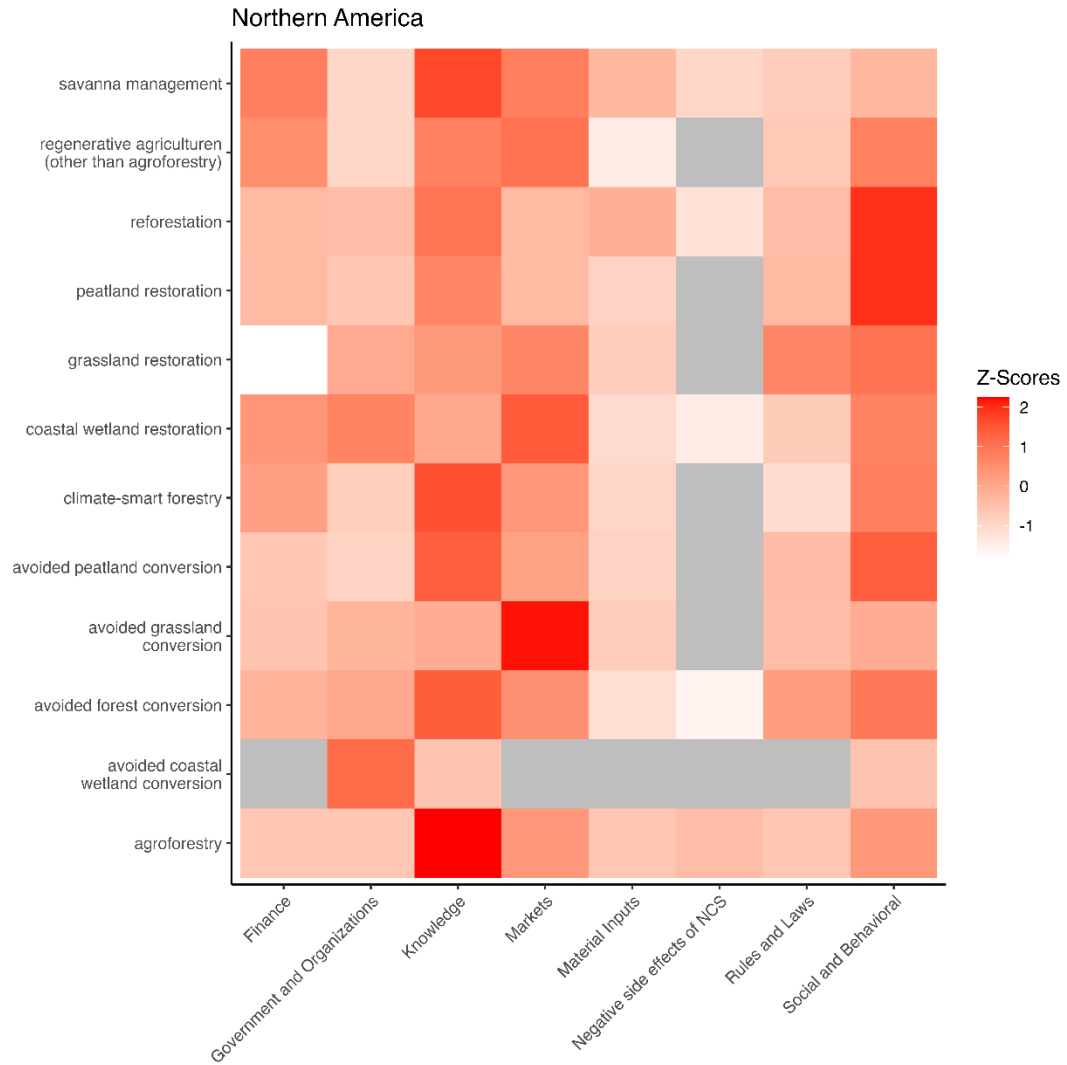

**Fig. S17. Pathway-level subregional z-score heatmaps for all 20 subregions with data.** Maps indicate the frequency with which a given constraint category was observed for a given pathway in a subregion compared to the mean frequency for all constraint categories for the pathway in that subregion, expressed as the number of standard deviations from the mean. Maps are color-coded at the pathway level. Grey indicates no data. Hashing indicates undefined z-score (standard deviation = 0).

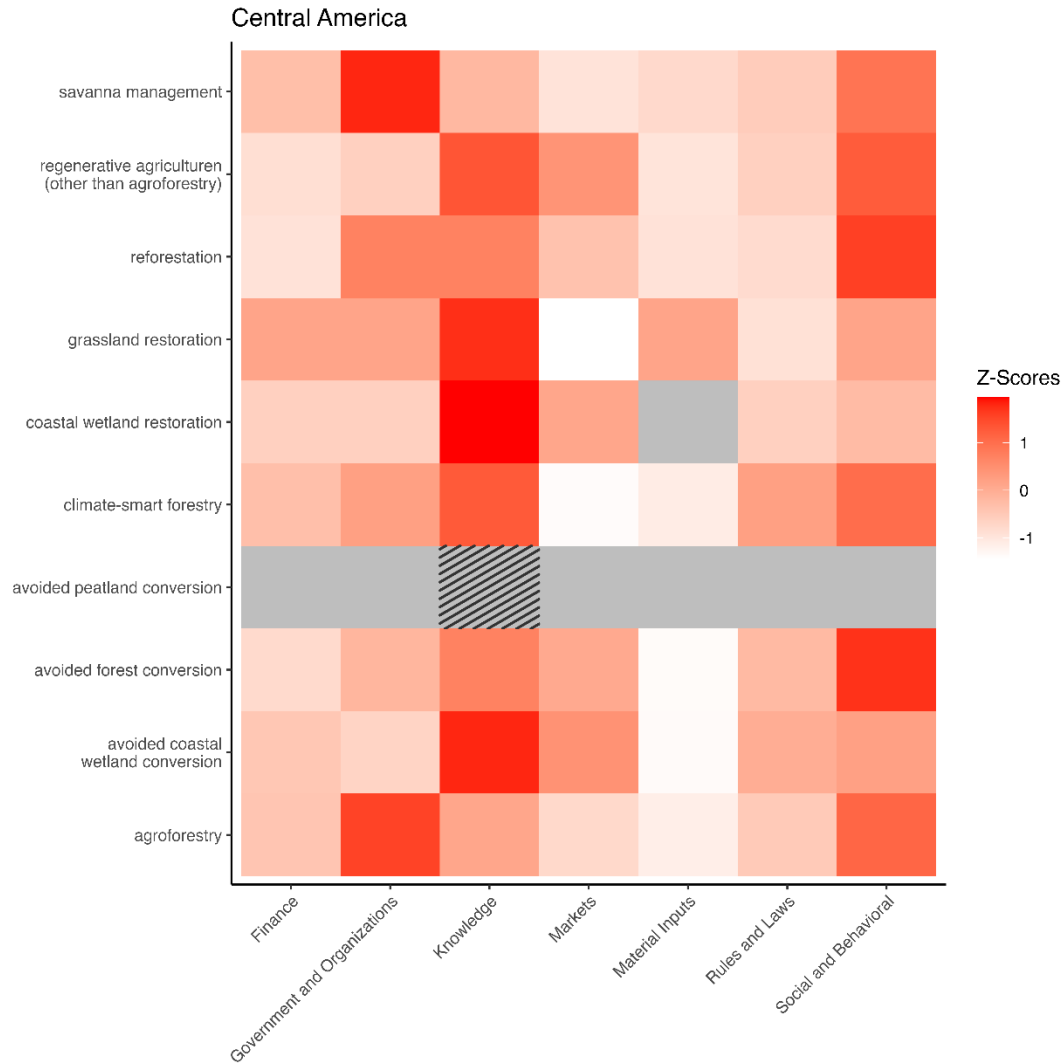

**Fig. S17 (continued). Pathway-level subregional z-score heatmaps for all 20 subregions with data.** Maps indicate the frequency with which a given constraint category was observed for a given pathway in a subregion compared to the mean frequency for all constraint categories for the pathway in that subregion, expressed as the number of standard deviations from the mean. Maps are color-coded at the pathway level. Grey indicates no data. Hashing indicates undefined z-score (standard deviation = 0).

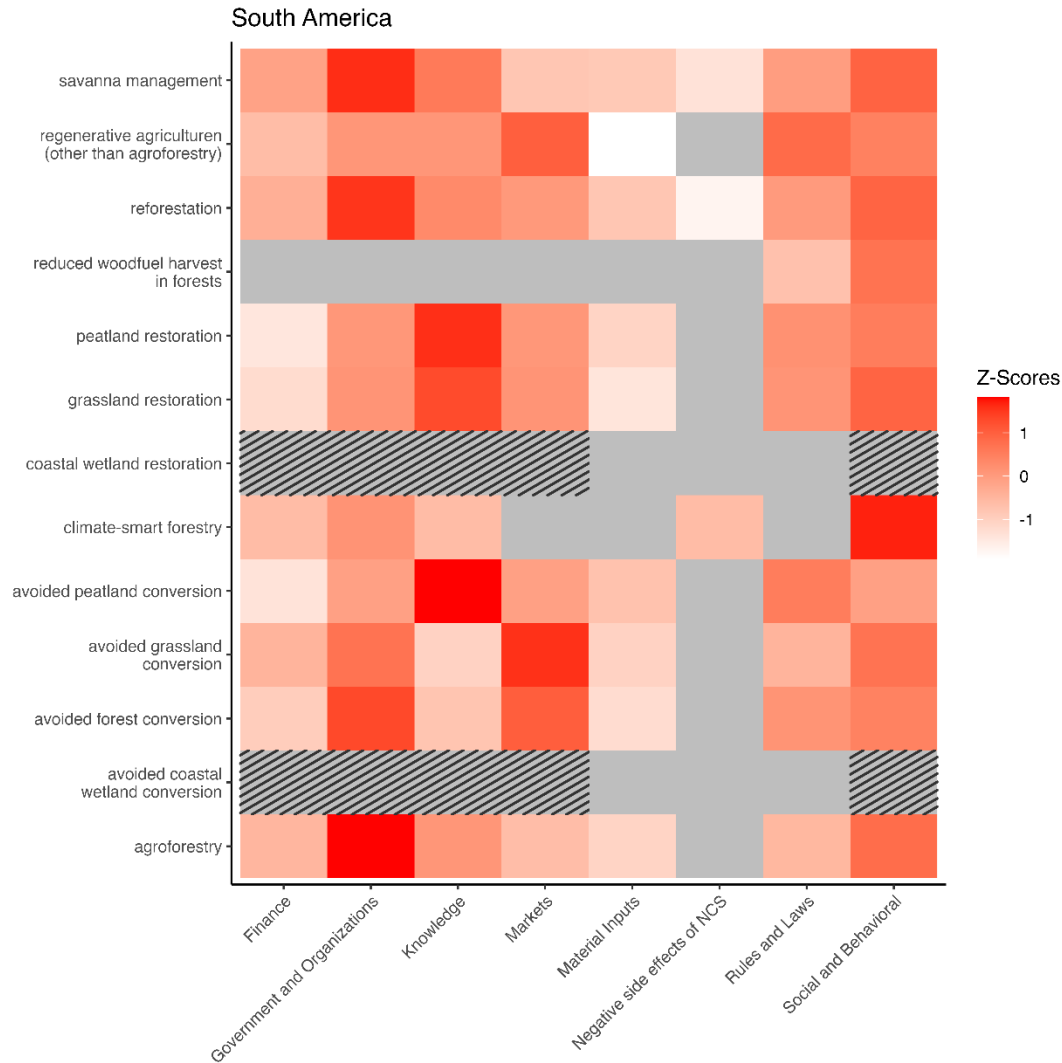

**Fig. S17 (continued). Pathway-level subregional z-score heatmaps for all 20 subregions with data.** Maps indicate the frequency with which a given constraint category was observed for a given pathway in a subregion compared to the mean frequency for all constraint categories for the pathway in that subregion, expressed as the number of standard deviations from the mean. Maps are color-coded at the pathway level. Grey indicates no data. Hashing indicates undefined z-score (standard deviation = 0).

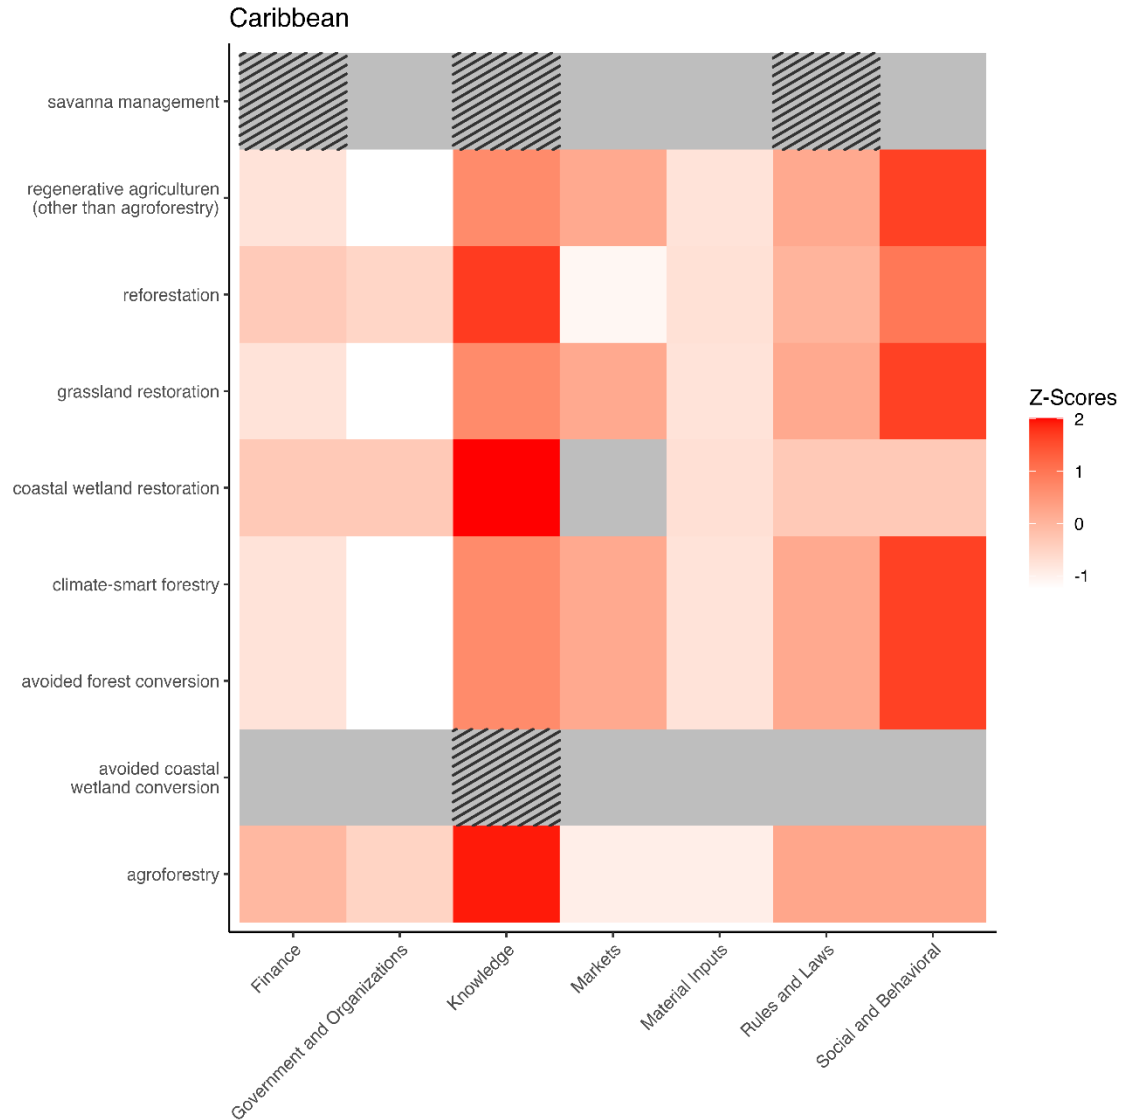

**Fig. S17 (continued). Pathway-level subregional z-score heatmaps for all 20 subregions with data.** Maps indicate the frequency with which a given constraint category was observed for a given pathway in a subregion compared to the mean frequency for all constraint categories for the pathway in that subregion, expressed as the number of standard deviations from the mean. Maps are color-coded at the pathway level. Grey indicates no data. Hashing indicates undefined z-score (standard deviation = 0).

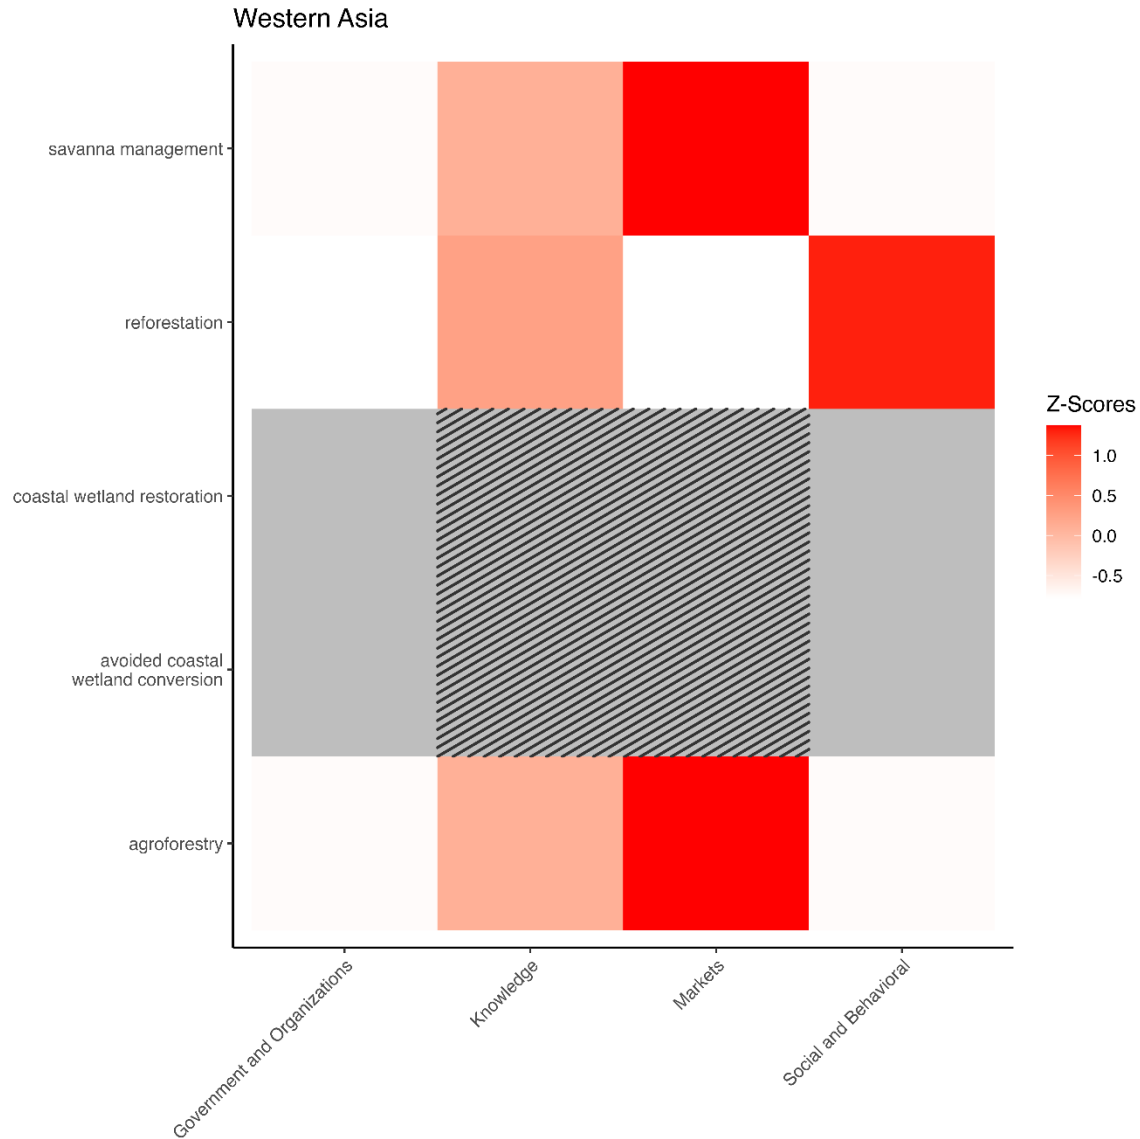

**Fig. S17 (continued). Pathway-level subregional z-score heatmaps for all 20 subregions with data.** Maps indicate the frequency with which a given constraint category was observed for a given pathway in a subregion compared to the mean frequency for all constraint categories for the pathway in that subregion, expressed as the number of standard deviations from the mean. Maps are color-coded at the pathway level. Grey indicates no data. Hashing indicates undefined z-score (standard deviation = 0).

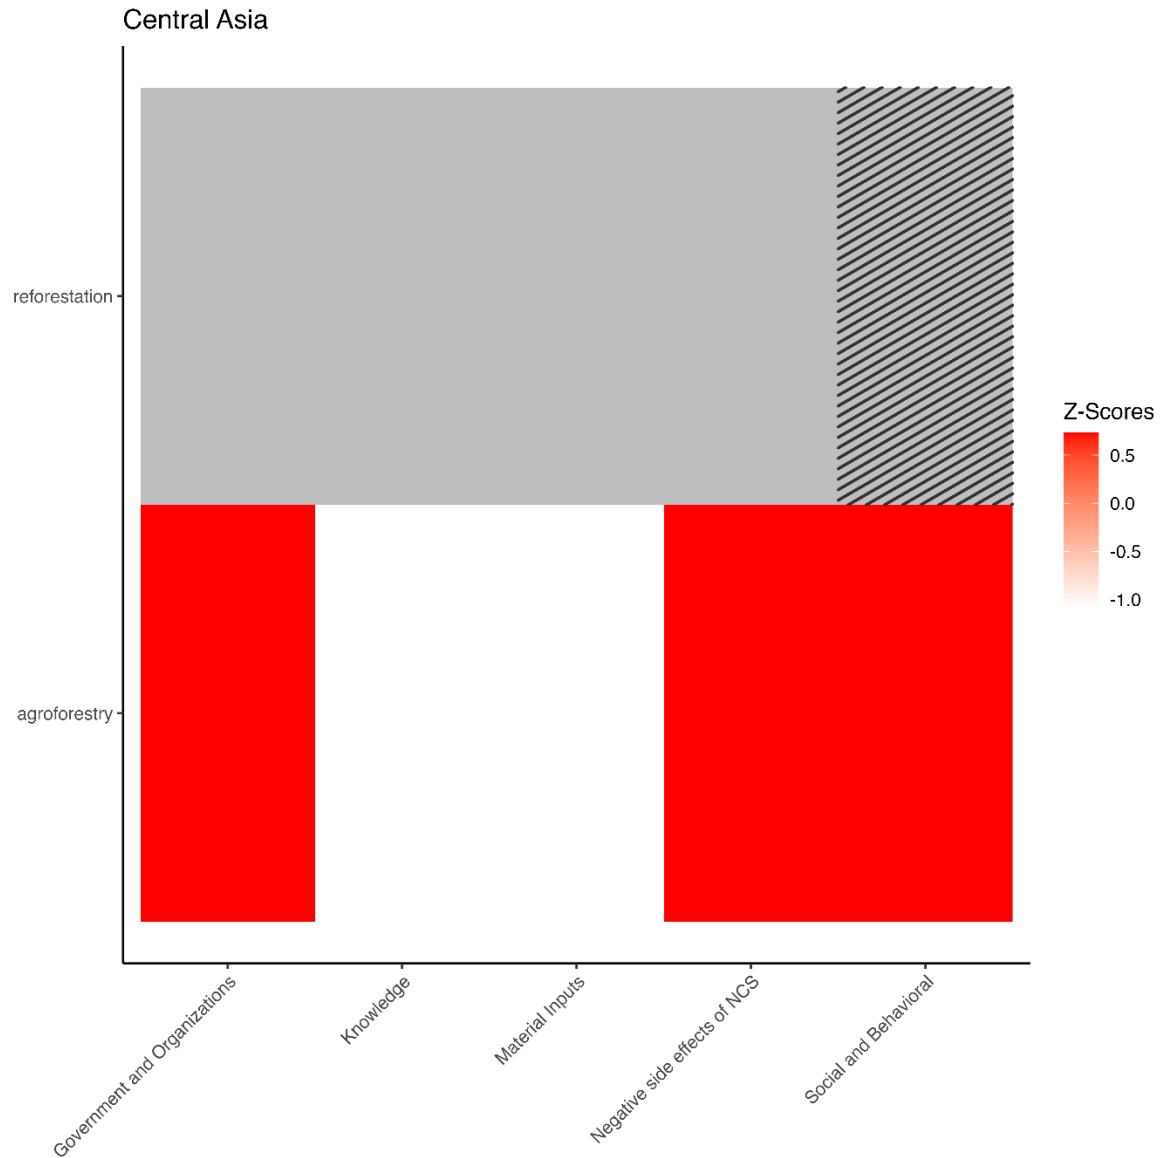

**Fig. S17 (continued). Pathway-level subregional z-score heatmaps for all 20 subregions with data.** Maps indicate the frequency with which a given constraint category was observed for a given pathway in a subregion compared to the mean frequency for all constraint categories for the pathway in that subregion, expressed as the number of standard deviations from the mean. Maps are color-coded at the pathway level. Grey indicates no data. Hashing indicates undefined z-score (standard deviation = 0).

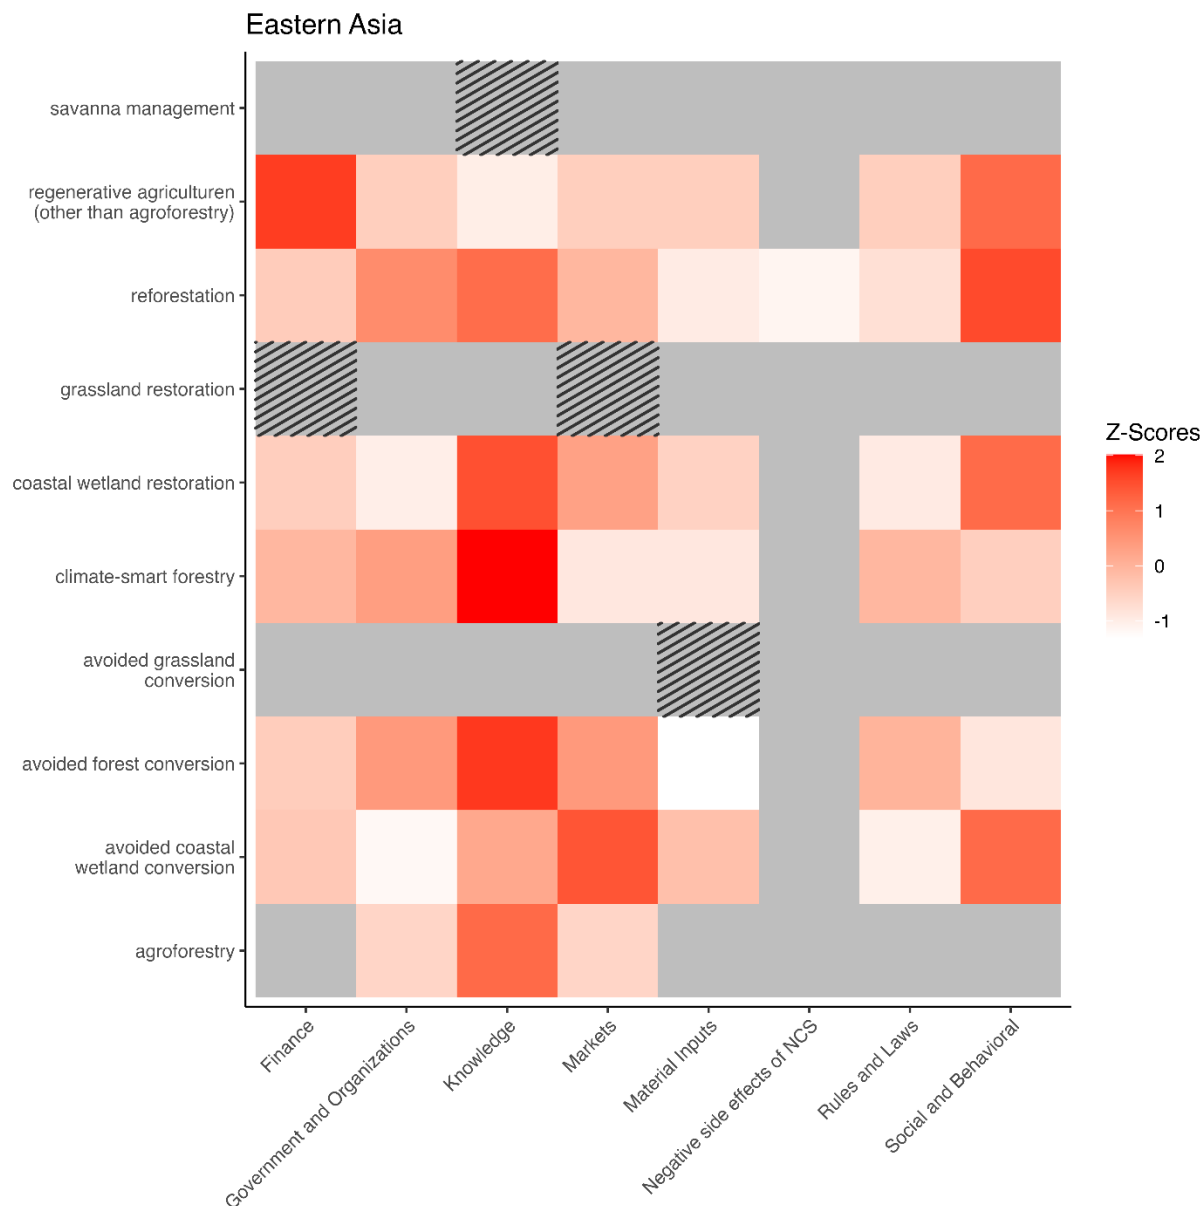

**Fig. S17 (continued). Pathway-level subregional z-score heatmaps for all 20 subregions with data.** Maps indicate the frequency with which a given constraint category was observed for a given pathway in a subregion compared to the mean frequency for all constraint categories for the pathway in that subregion, expressed as the number of standard deviations from the mean. Maps are color-coded at the pathway level. Grey indicates no data. Hashing indicates undefined z-score (standard deviation = 0).

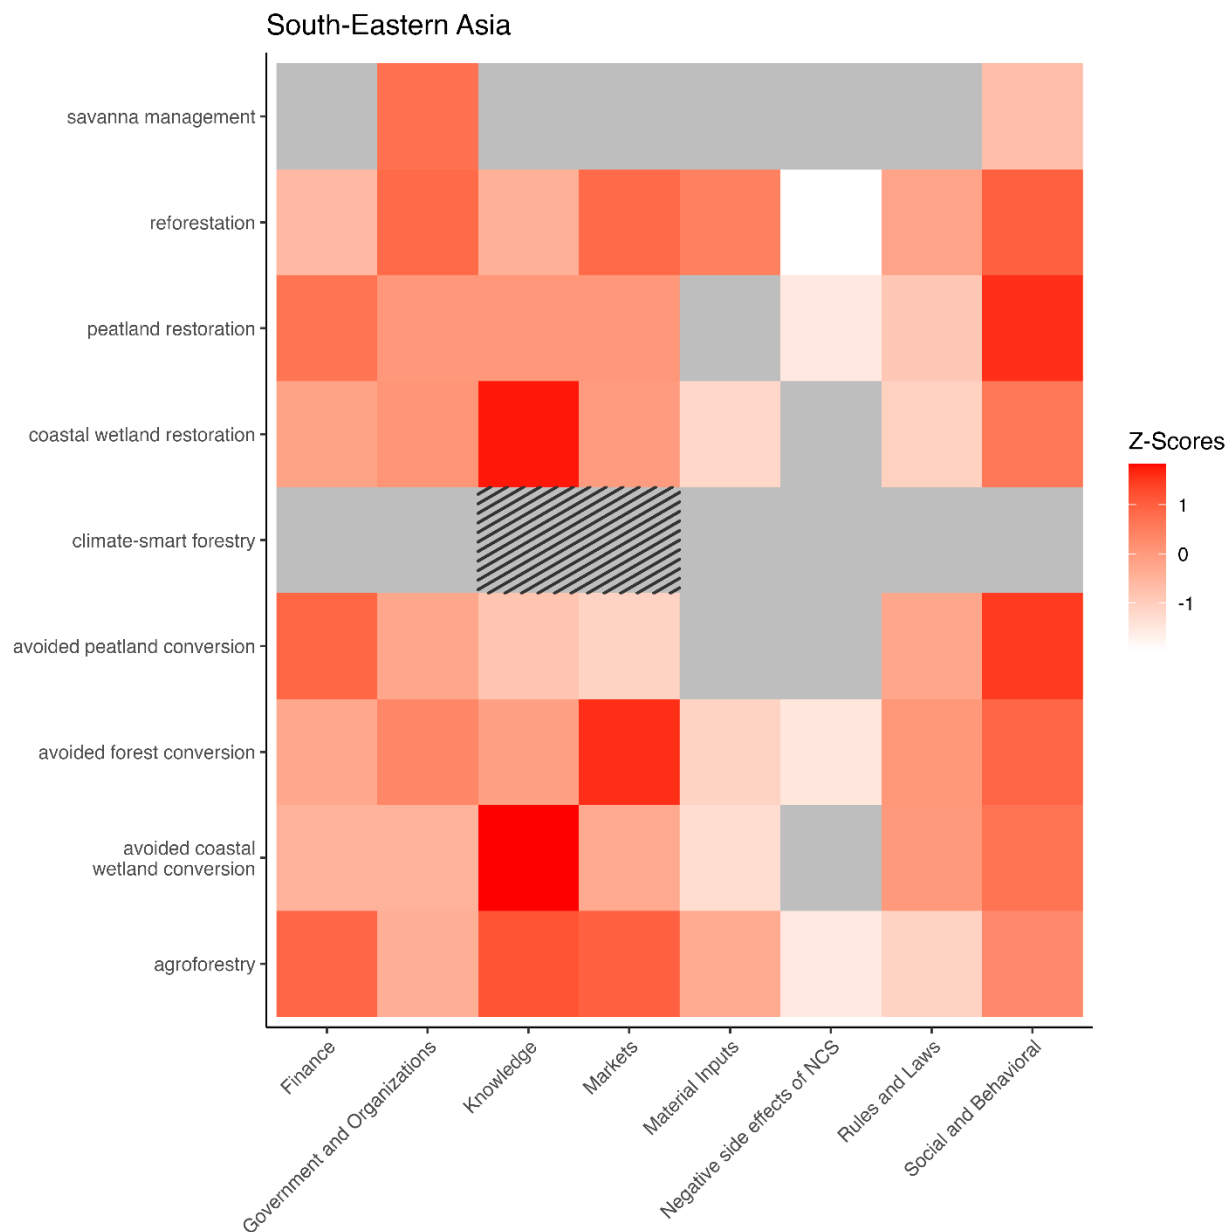

**Fig. S17 (continued). Pathway-level subregional z-score heatmaps for all 20 subregions with data.** Maps indicate the frequency with which a given constraint category was observed for a given pathway in a subregion compared to the mean frequency for all constraint categories for the pathway in that subregion, expressed as the number of standard deviations from the mean. Maps are color-coded at the pathway level. Grey indicates no data. Hashing indicates undefined z-score (standard deviation = 0).



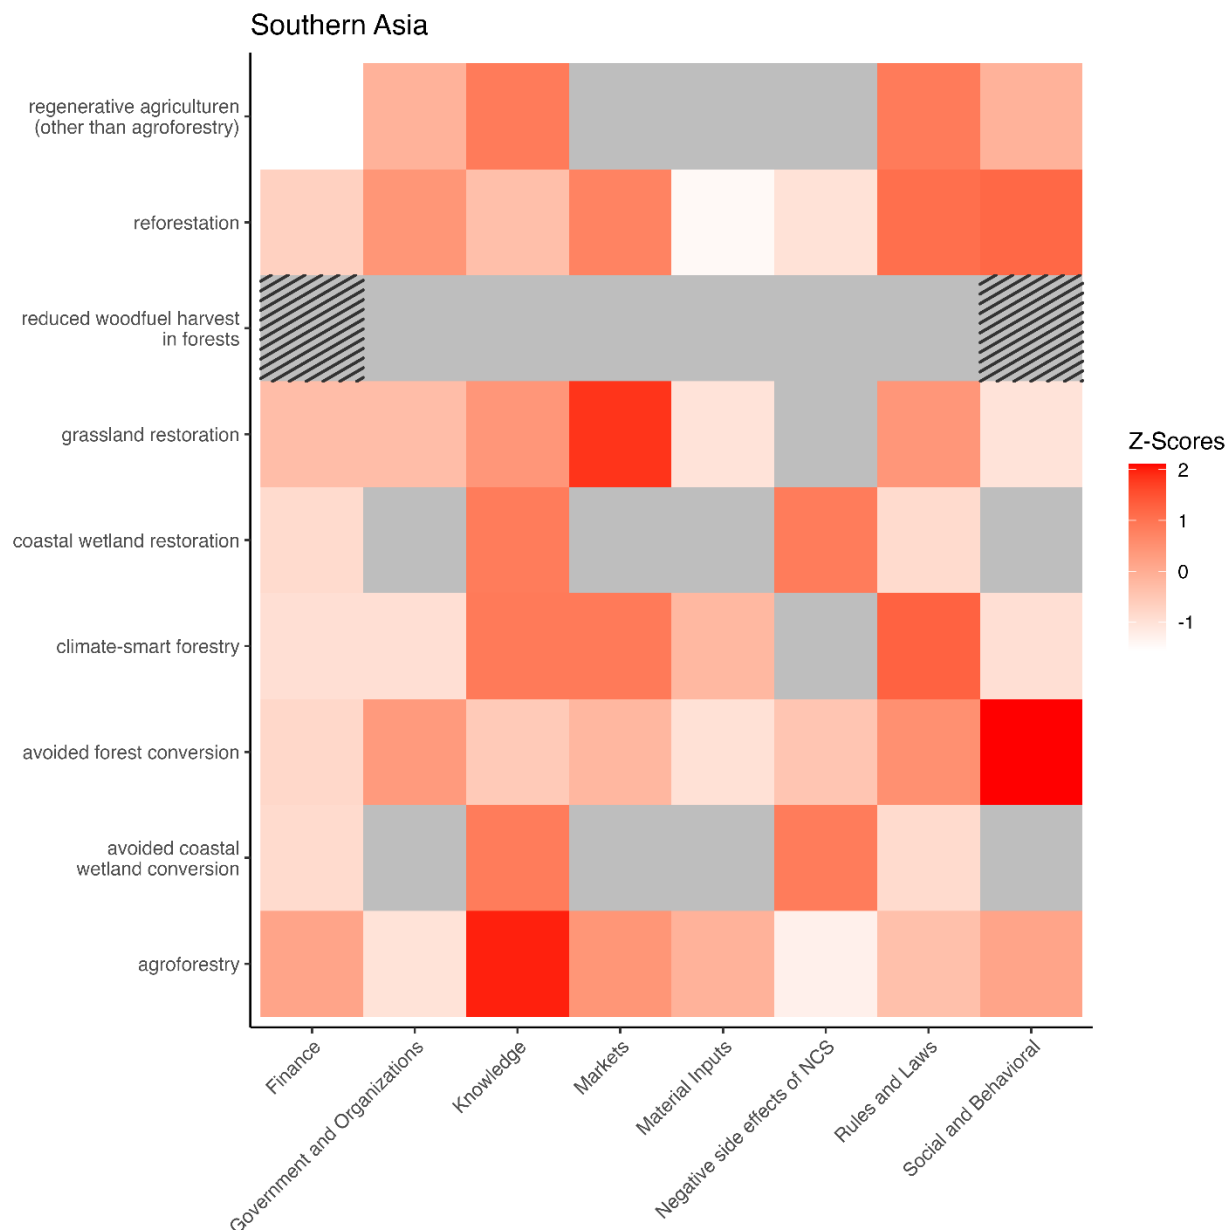

**Fig. S17 (continued). Pathway-level subregional z-score heatmaps for all 20 subregions with data.** Maps indicate the frequency with which a given constraint category was observed for a given pathway in a subregion compared to the mean frequency for all constraint categories for the pathway in that subregion, expressed as the number of standard deviations from the mean. Maps are color-coded at the pathway level. Grey indicates no data. Hashing indicates undefined z-score (standard deviation = 0).

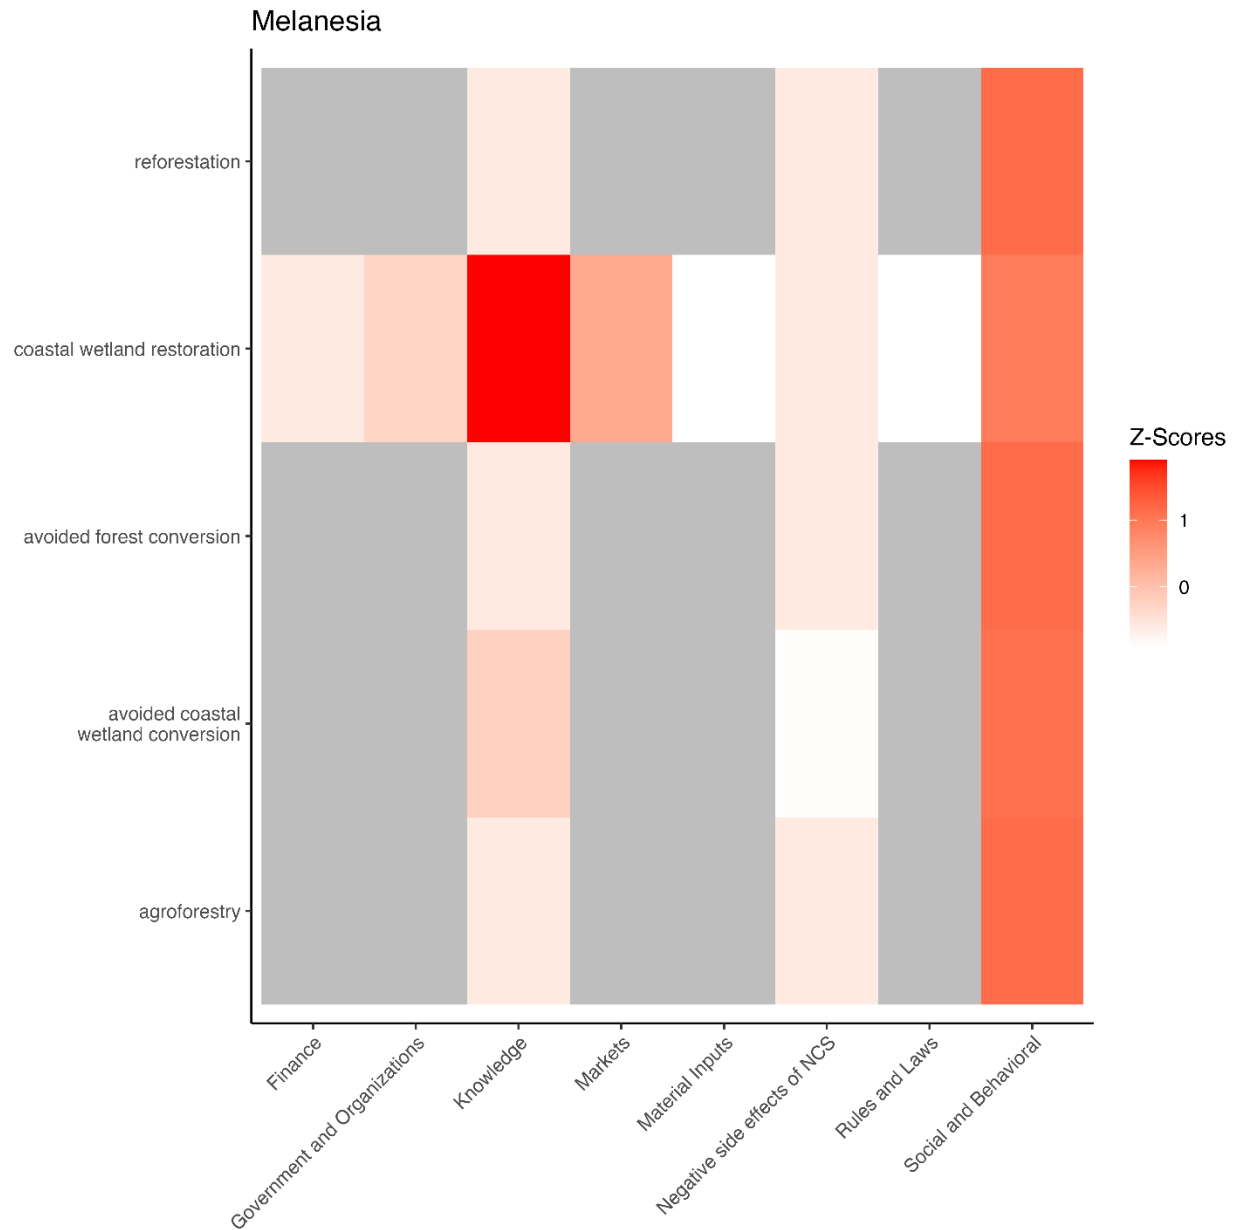

**Fig. S17 (continued). Pathway-level subregional z-score heatmaps for all 20 subregions with data.** Maps indicate the frequency with which a given constraint category was observed for a given pathway in a subregion compared to the mean frequency for all constraint categories for the pathway in that subregion, expressed as the number of standard deviations from the mean. Maps are color-coded at the pathway level. Grey indicates no data. Hashing indicates undefined z-score (standard deviation = 0).

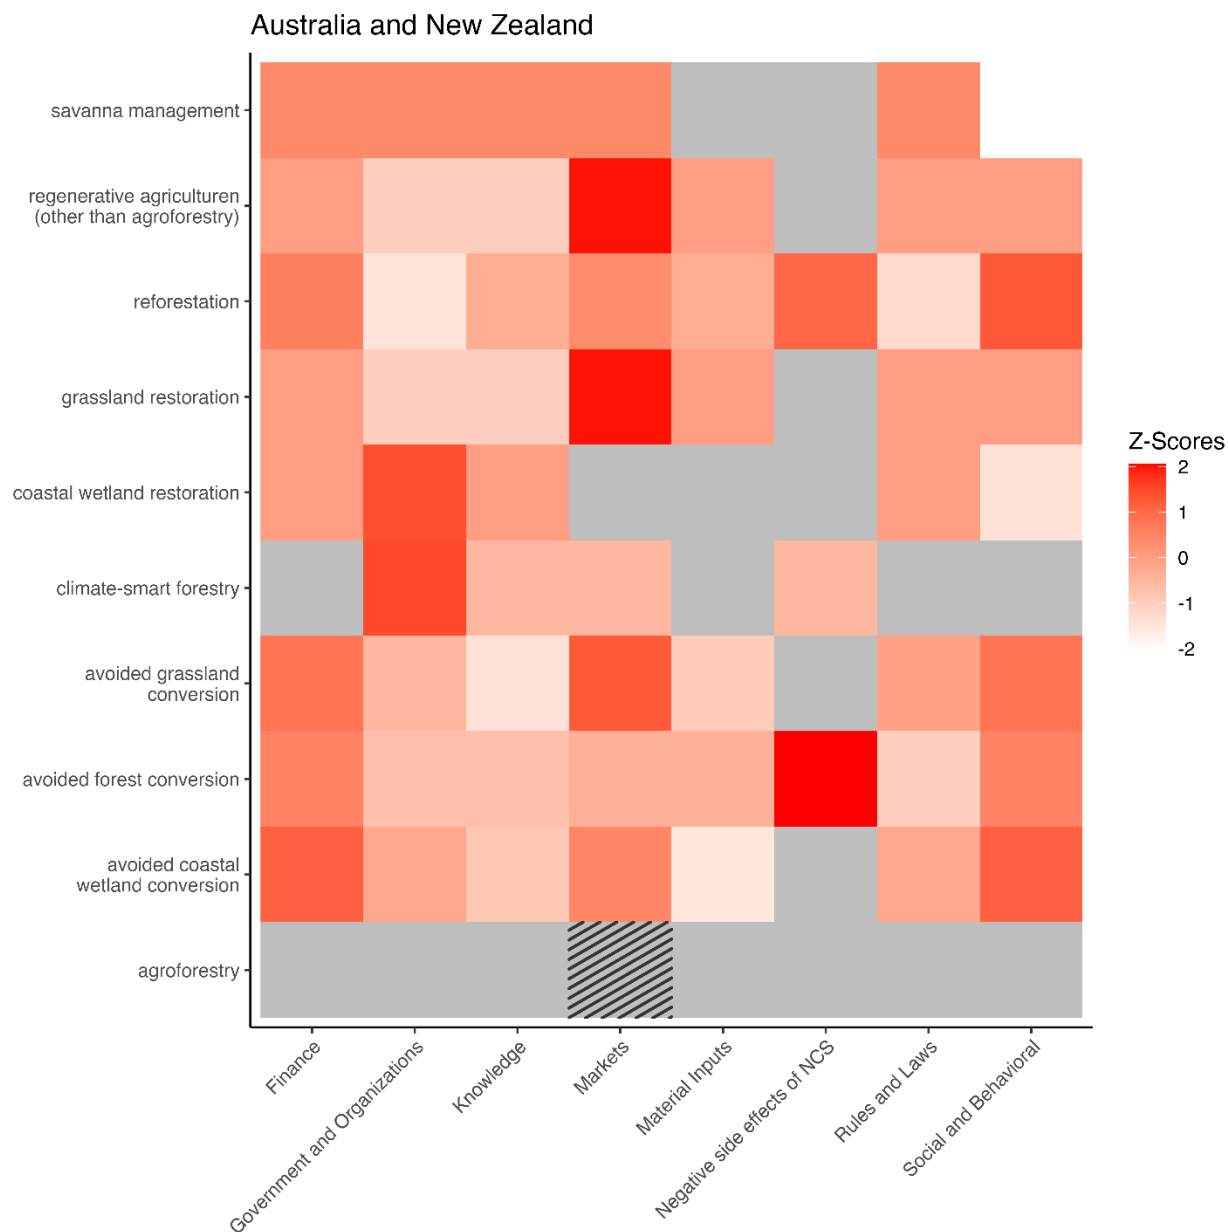

**Fig. S17 (continued). Pathway-level subregional z-score heatmaps for all 20 subregions with data.** Maps indicate the frequency with which a given constraint category was observed for a given pathway in a subregion compared to the mean frequency for all constraint categories for the pathway in that subregion, expressed as the number of standard deviations from the mean. Maps are color-coded at the pathway level. Grey indicates no data. Hashing indicates undefined z-score (standard deviation = 0).

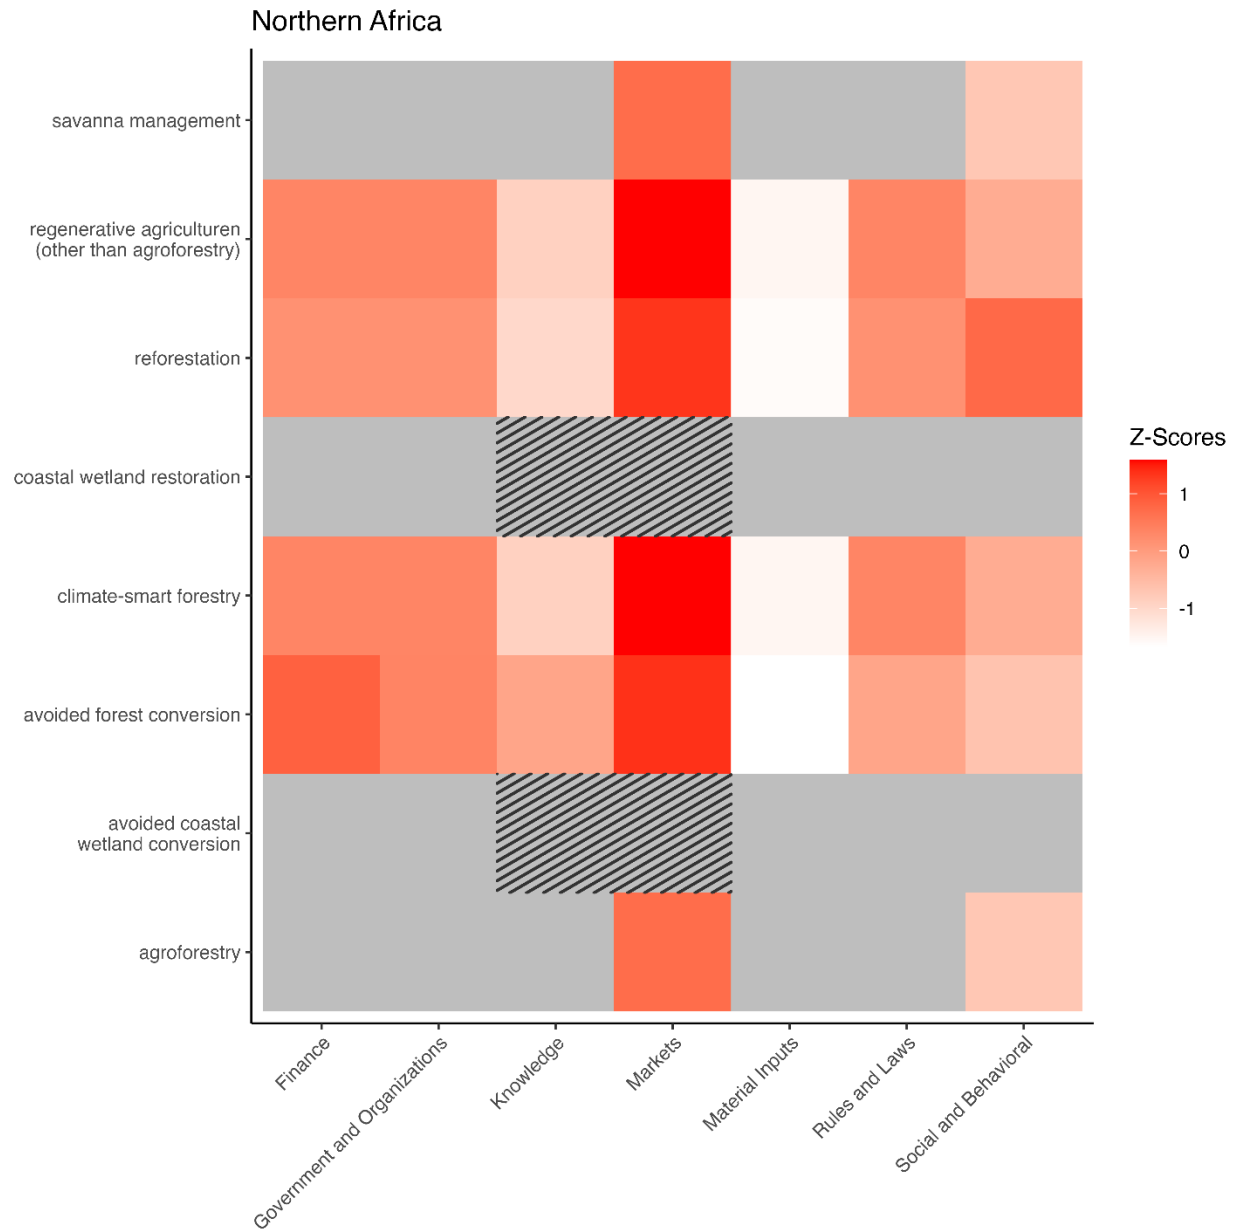

**Fig. S17 (continued). Pathway-level subregional z-score heatmaps for all 20 subregions with data.** Maps indicate the frequency with which a given constraint category was observed for a given pathway in a subregion compared to the mean frequency for all constraint categories for the pathway in that subregion, expressed as the number of standard deviations from the mean. Maps are color-coded at the pathway level. Grey indicates no data. Hashing indicates undefined z-score (standard deviation = 0).

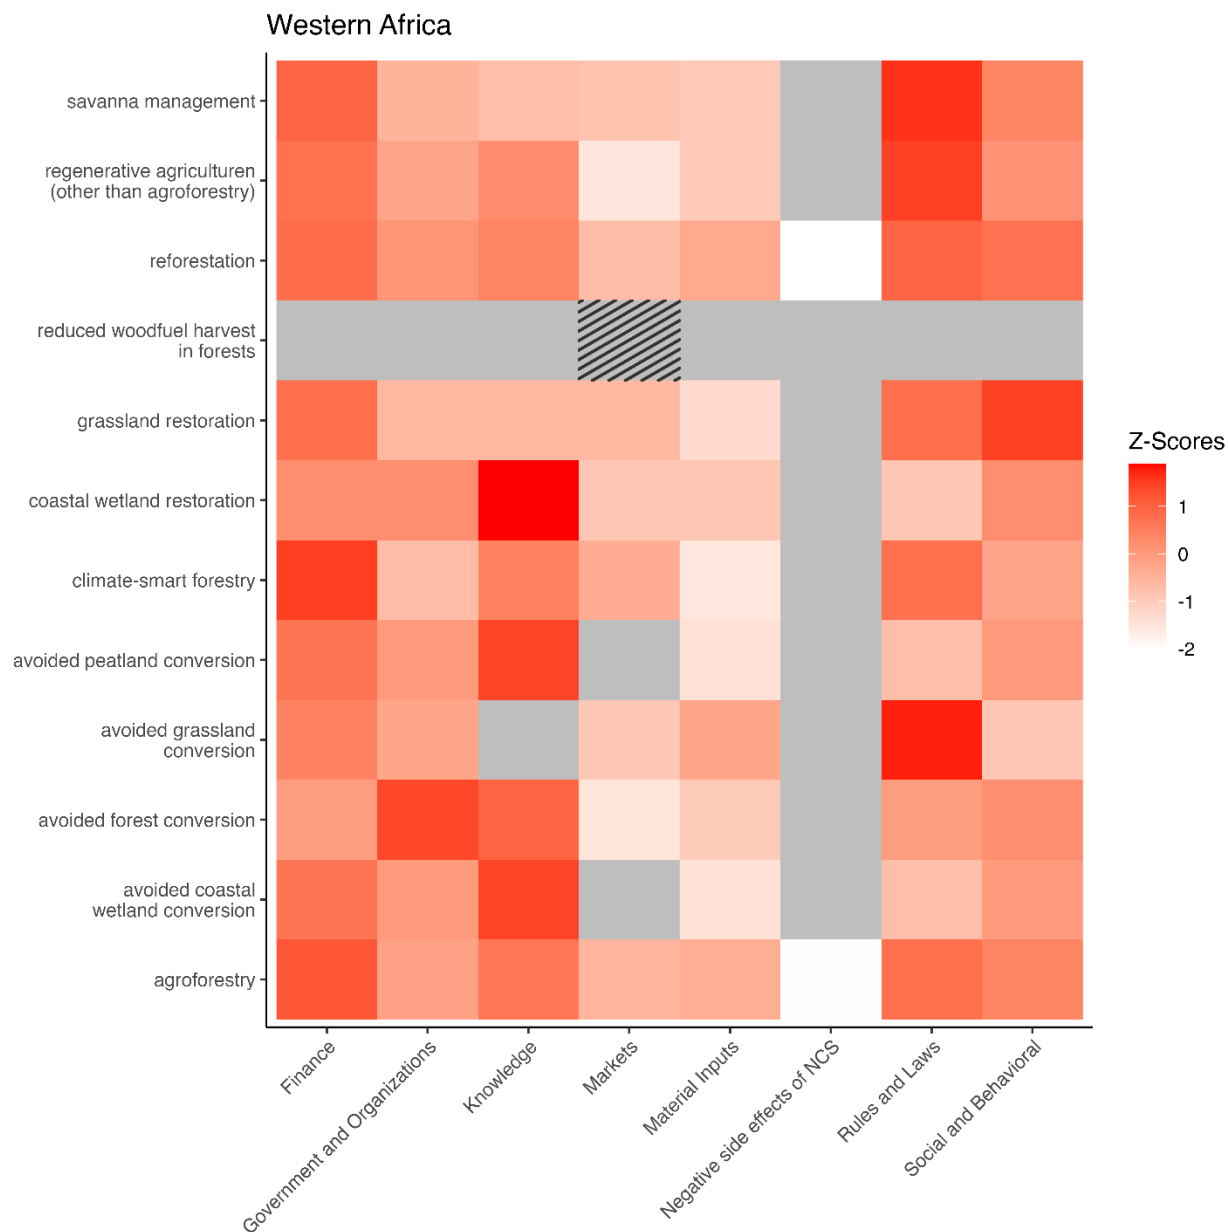

**Fig. S17 (continued). Pathway-level subregional z-score heatmaps for all 20 subregions with data.** Maps indicate the frequency with which a given constraint category was observed for a given pathway in a subregion compared to the mean frequency for all constraint categories for the pathway in that subregion, expressed as the number of standard deviations from the mean. Maps are color-coded at the pathway level. Grey indicates no data. Hashing indicates undefined z-score (standard deviation = 0).

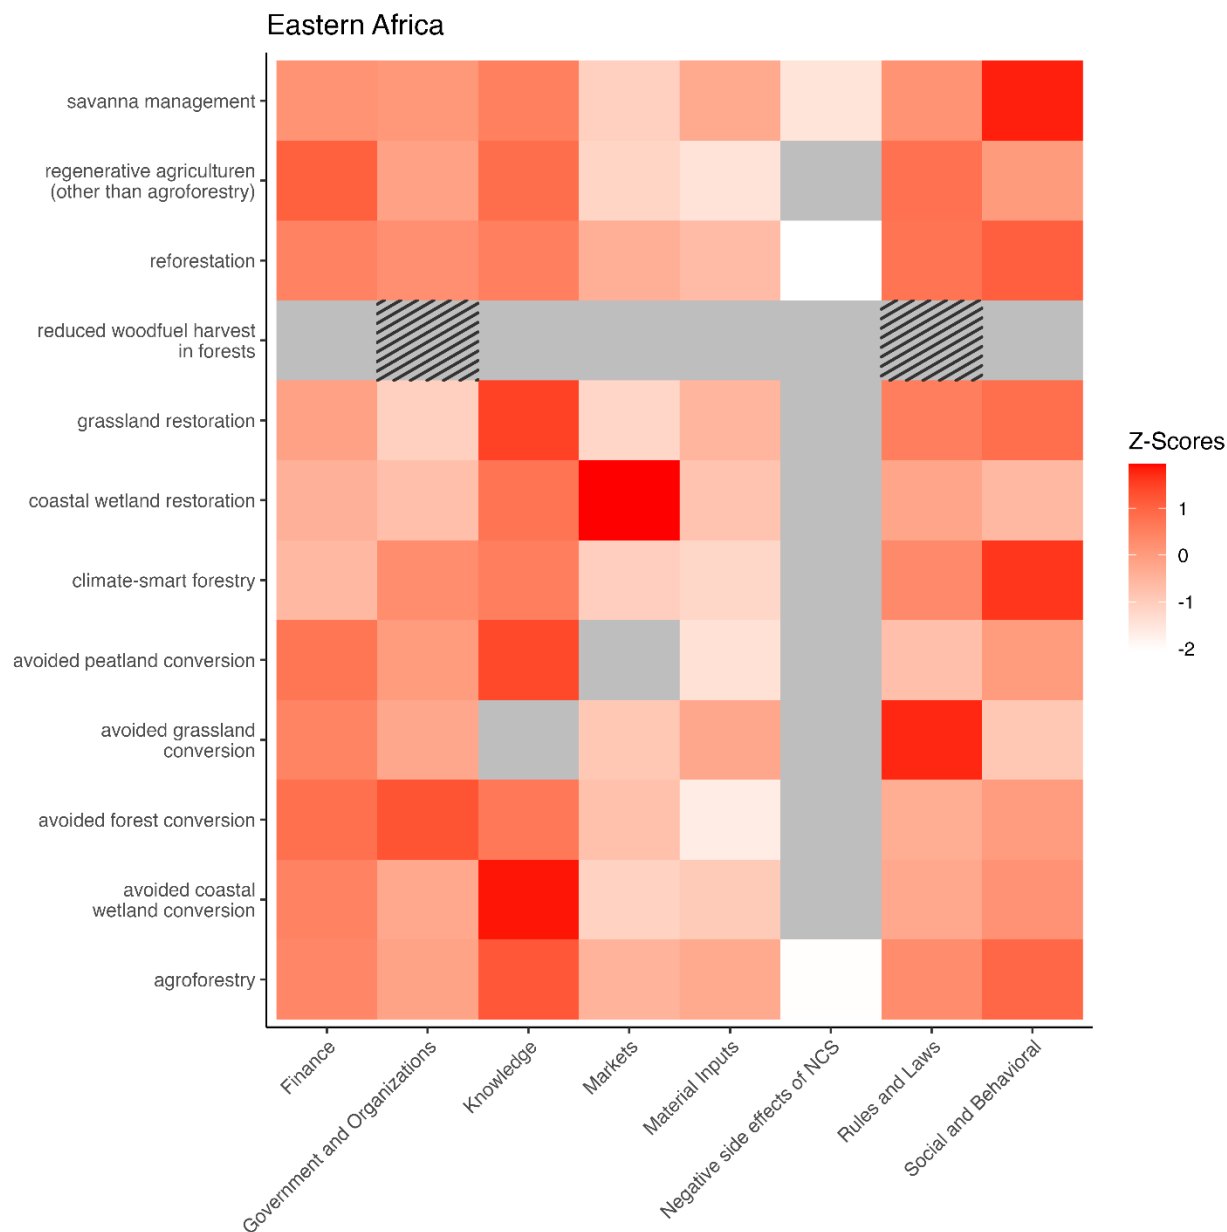

**Fig. S17 (continued). Pathway-level subregional z-score heatmaps for all 20 subregions with data.** Maps indicate the frequency with which a given constraint category was observed for a given pathway in a subregion compared to the mean frequency for all constraint categories for the pathway in that subregion, expressed as the number of standard deviations from the mean. Maps are color-coded at the pathway level. Grey indicates no data. Hashing indicates undefined z-score (standard deviation = 0).

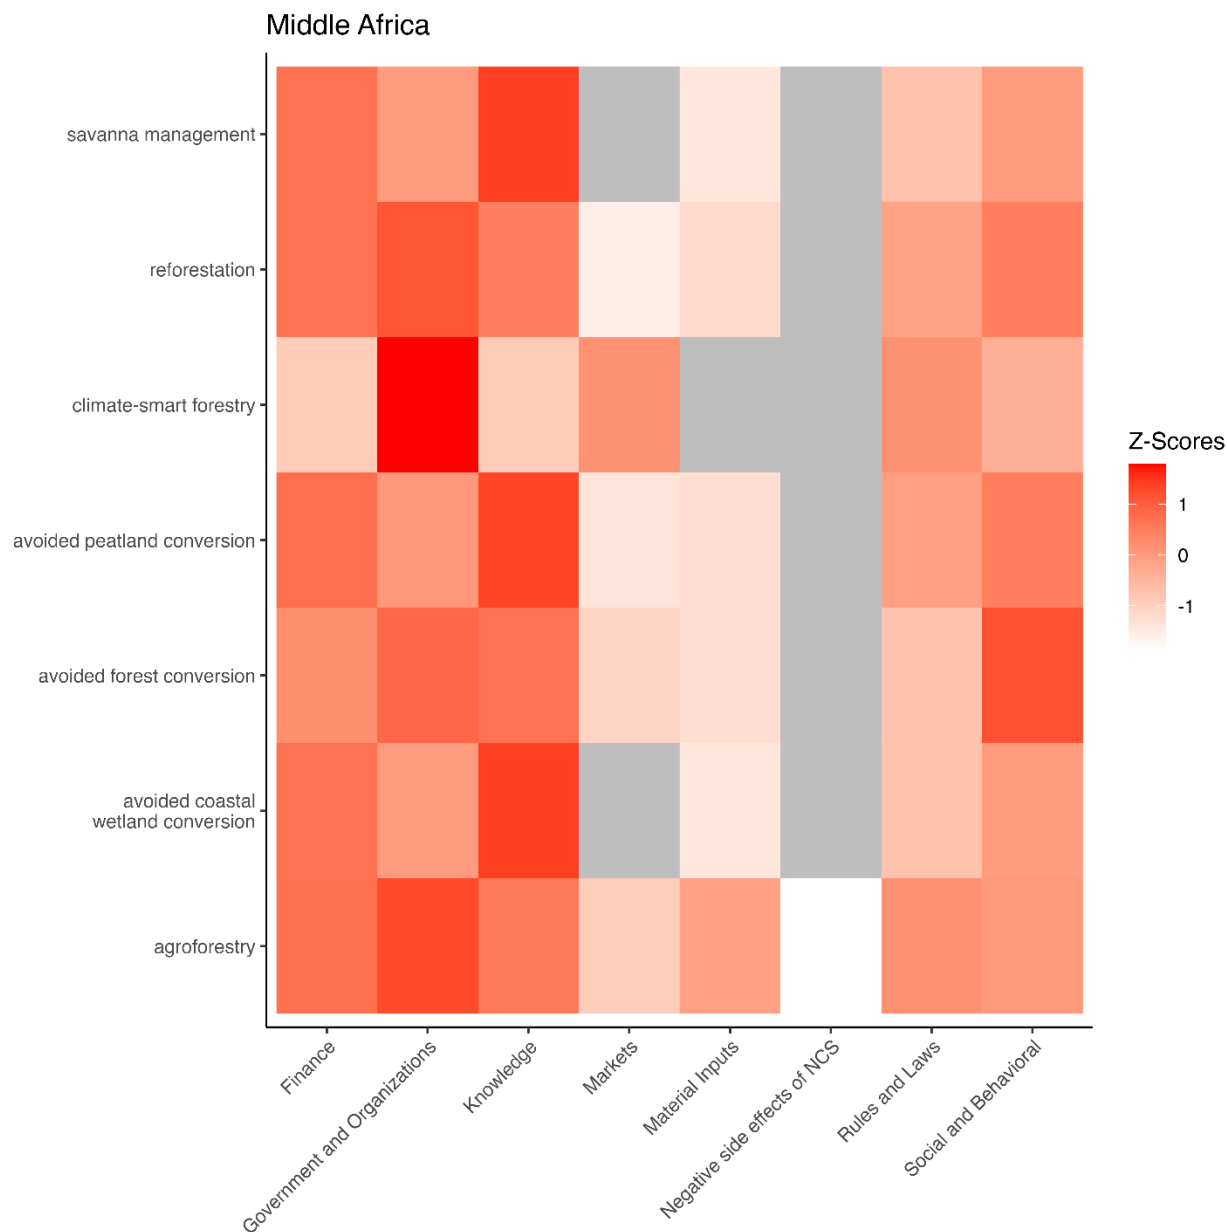

**Fig. S17 (continued). Pathway-level subregional z-score heatmaps for all 20 subregions with data.** Maps indicate the frequency with which a given constraint category was observed for a given pathway in a subregion compared to the mean frequency for all constraint categories for the pathway in that subregion, expressed as the number of standard deviations from the mean. Maps are color-coded at the pathway level. Grey indicates no data. Hashing indicates undefined z-score (standard deviation = 0).

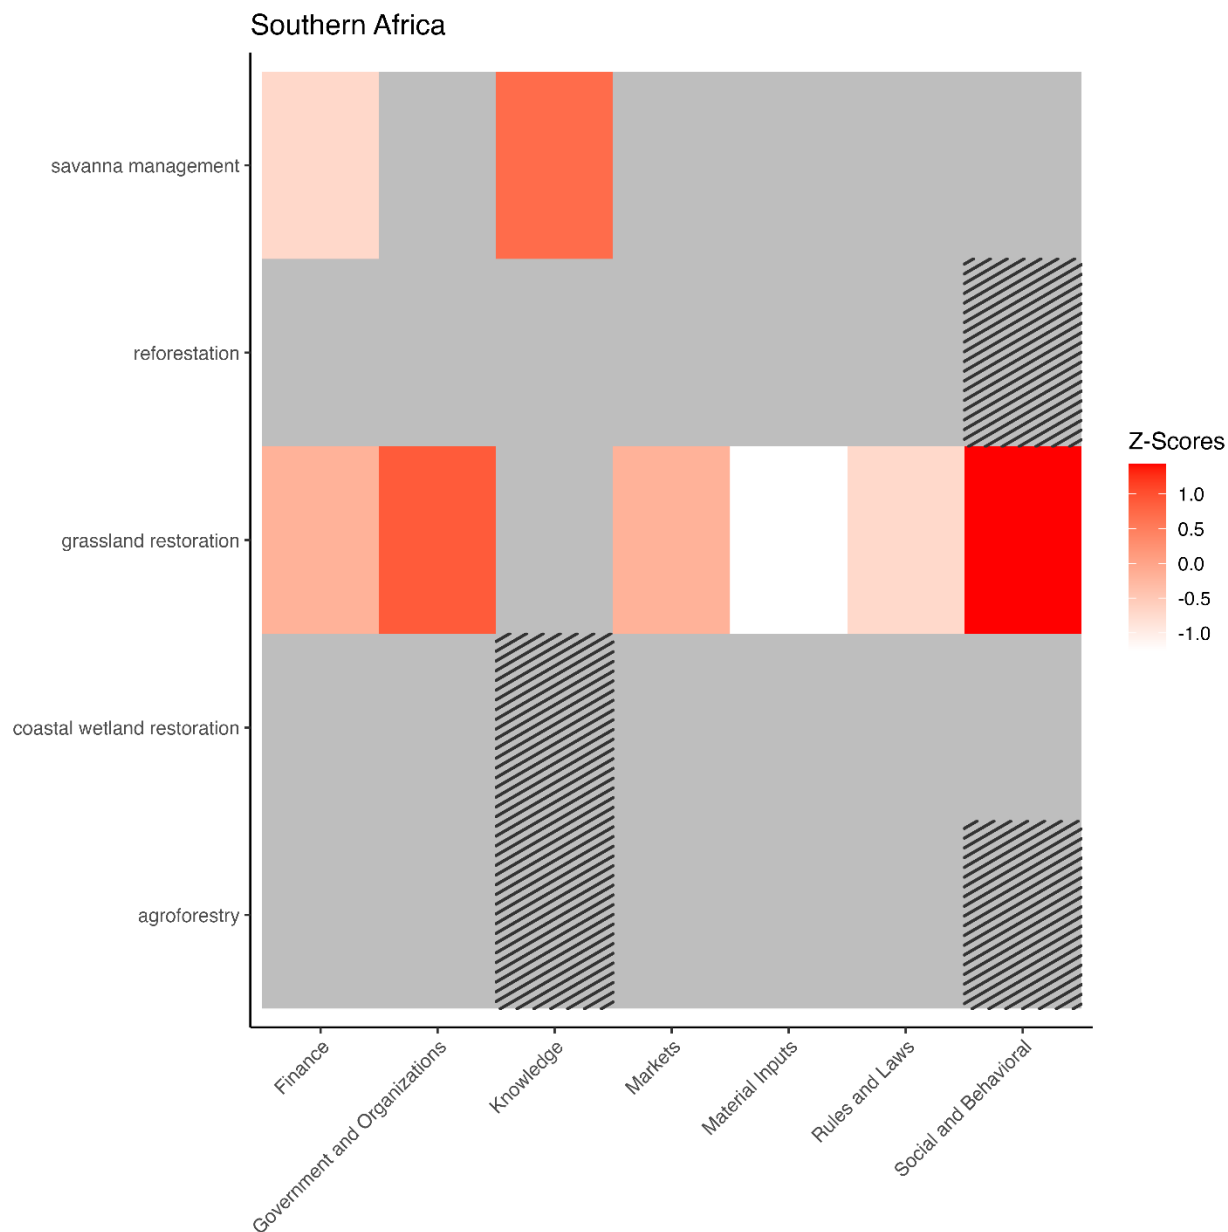

**Fig. S17 (continued). Pathway-level subregional z-score heatmaps for all 20 subregions with data.** Maps indicate the frequency with which a given constraint category was observed for a given pathway in a subregion compared to the mean frequency for all constraint categories for the pathway in that subregion, expressed as the number of standard deviations from the mean. Maps are color-coded at the pathway level. Grey indicates no data. Hashing indicates undefined z-score (standard deviation = 0).



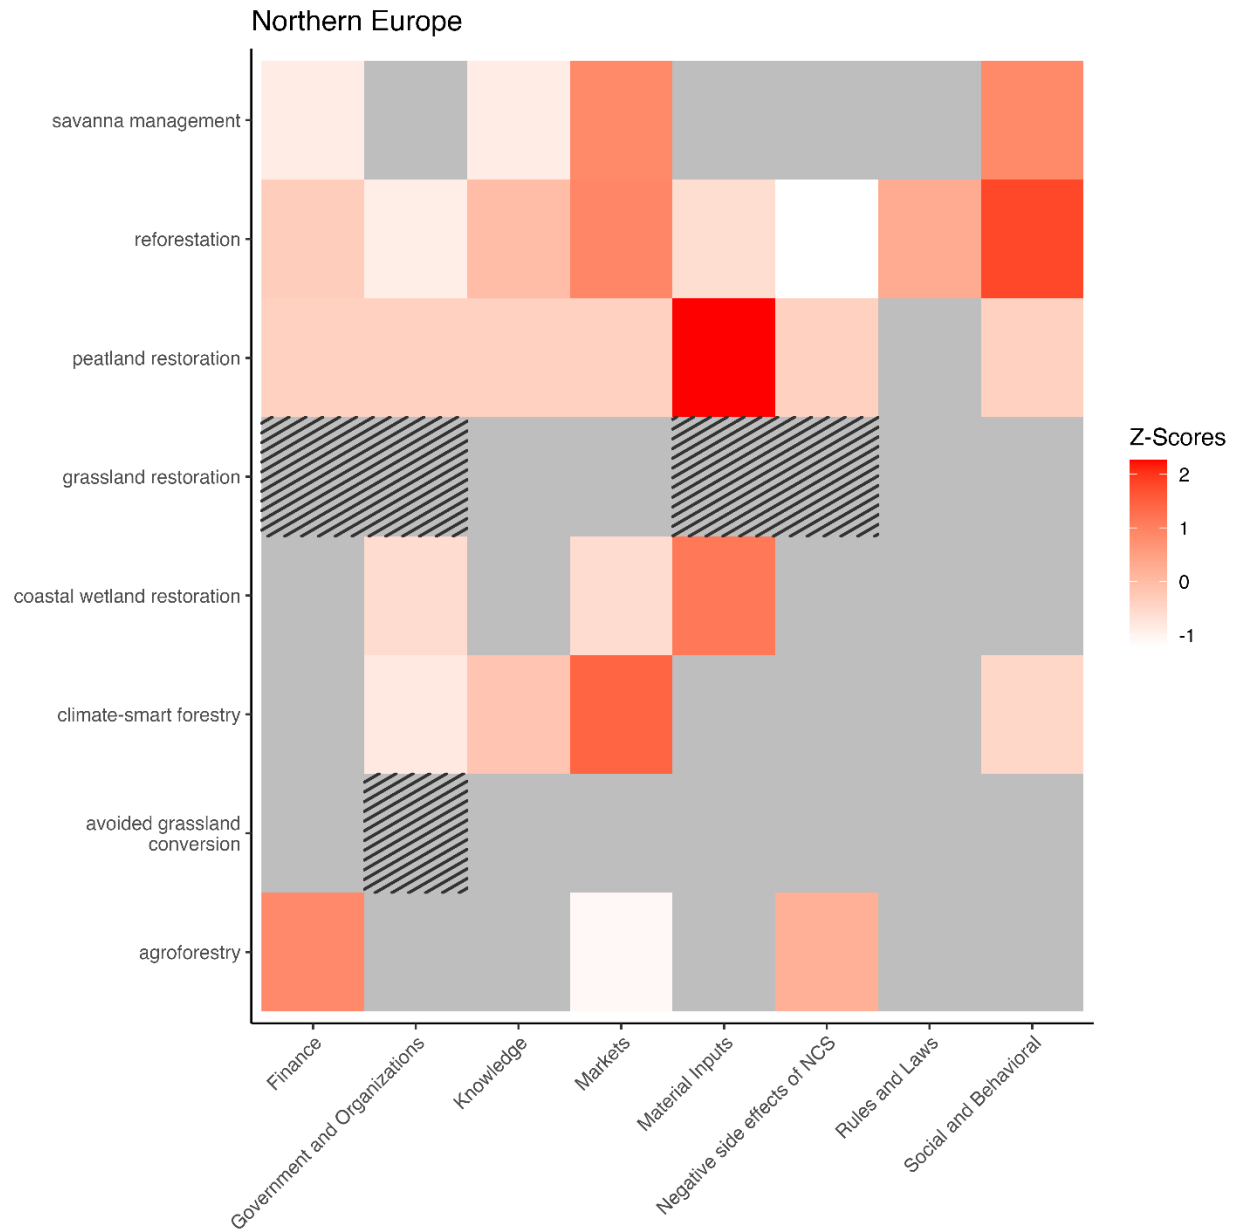

**Fig. S17 (continued). Pathway-level subregional z-score heatmaps for all 20 subregions with data.** Maps indicate the frequency with which a given constraint category was observed for a given pathway in a subregion compared to the mean frequency for all constraint categories for the pathway in that subregion, expressed as the number of standard deviations from the mean. Maps are color-coded at the pathway level. Grey indicates no data. Hashing indicates undefined z-score (standard deviation = 0).

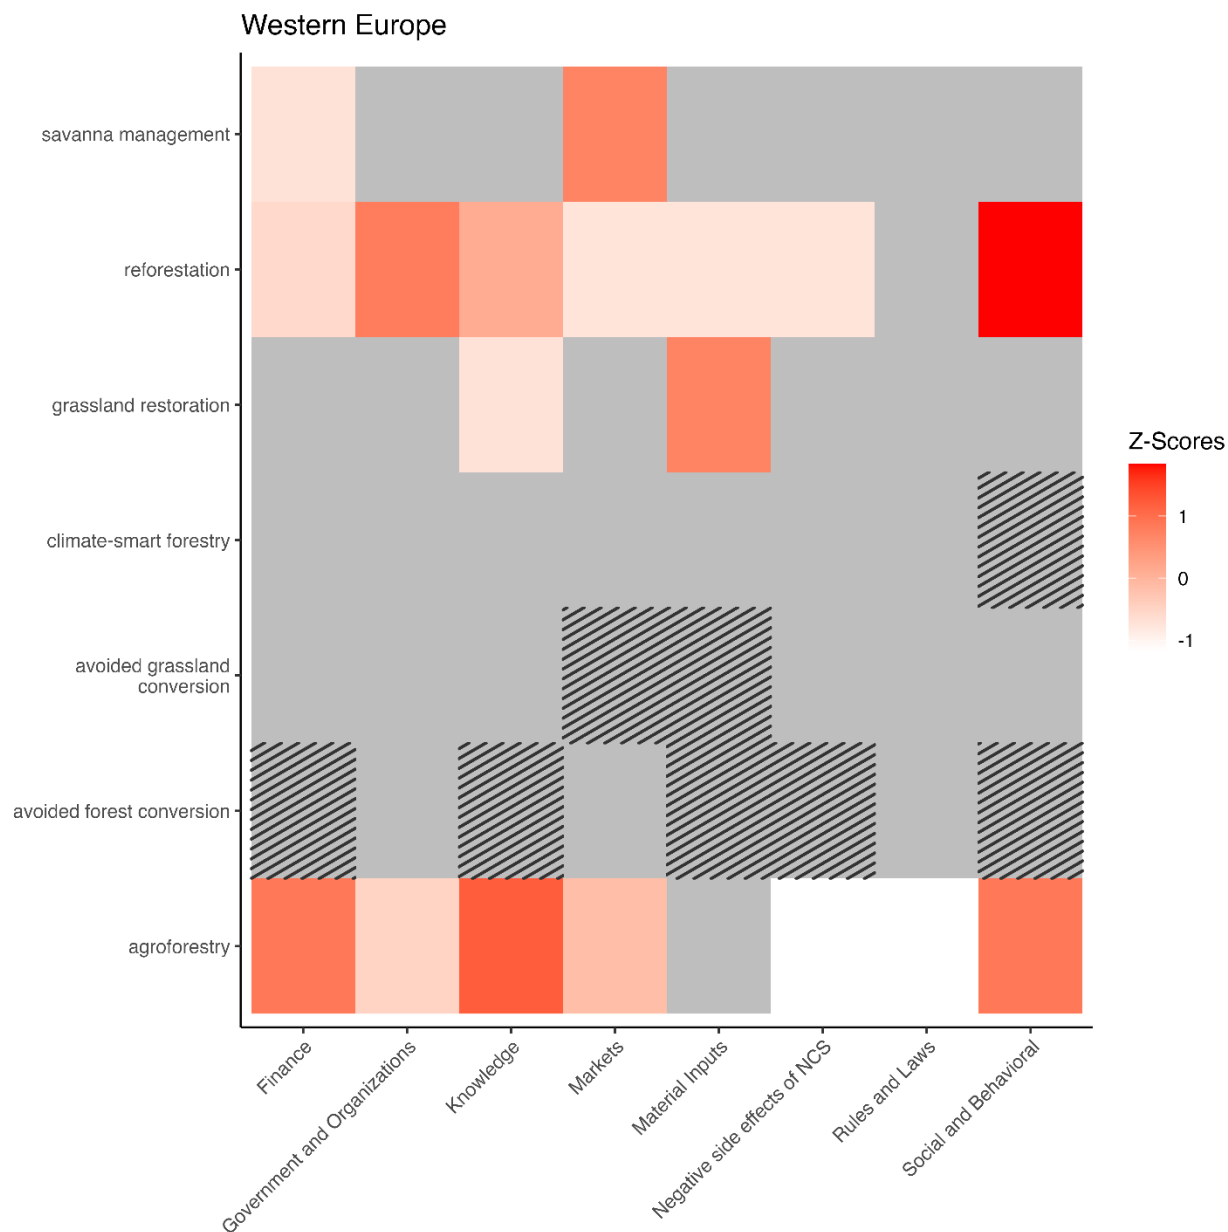

**Fig. S17 (continued). Pathway-level subregional z-score heatmaps for all 20 subregions with data.** Maps indicate the frequency with which a given constraint category was observed for a given pathway in a subregion compared to the mean frequency for all constraint categories for the pathway in that subregion, expressed as the number of standard deviations from the mean. Maps are color-coded at the pathway level. Grey indicates no data. Hashing indicates undefined z-score (standard deviation = 0).

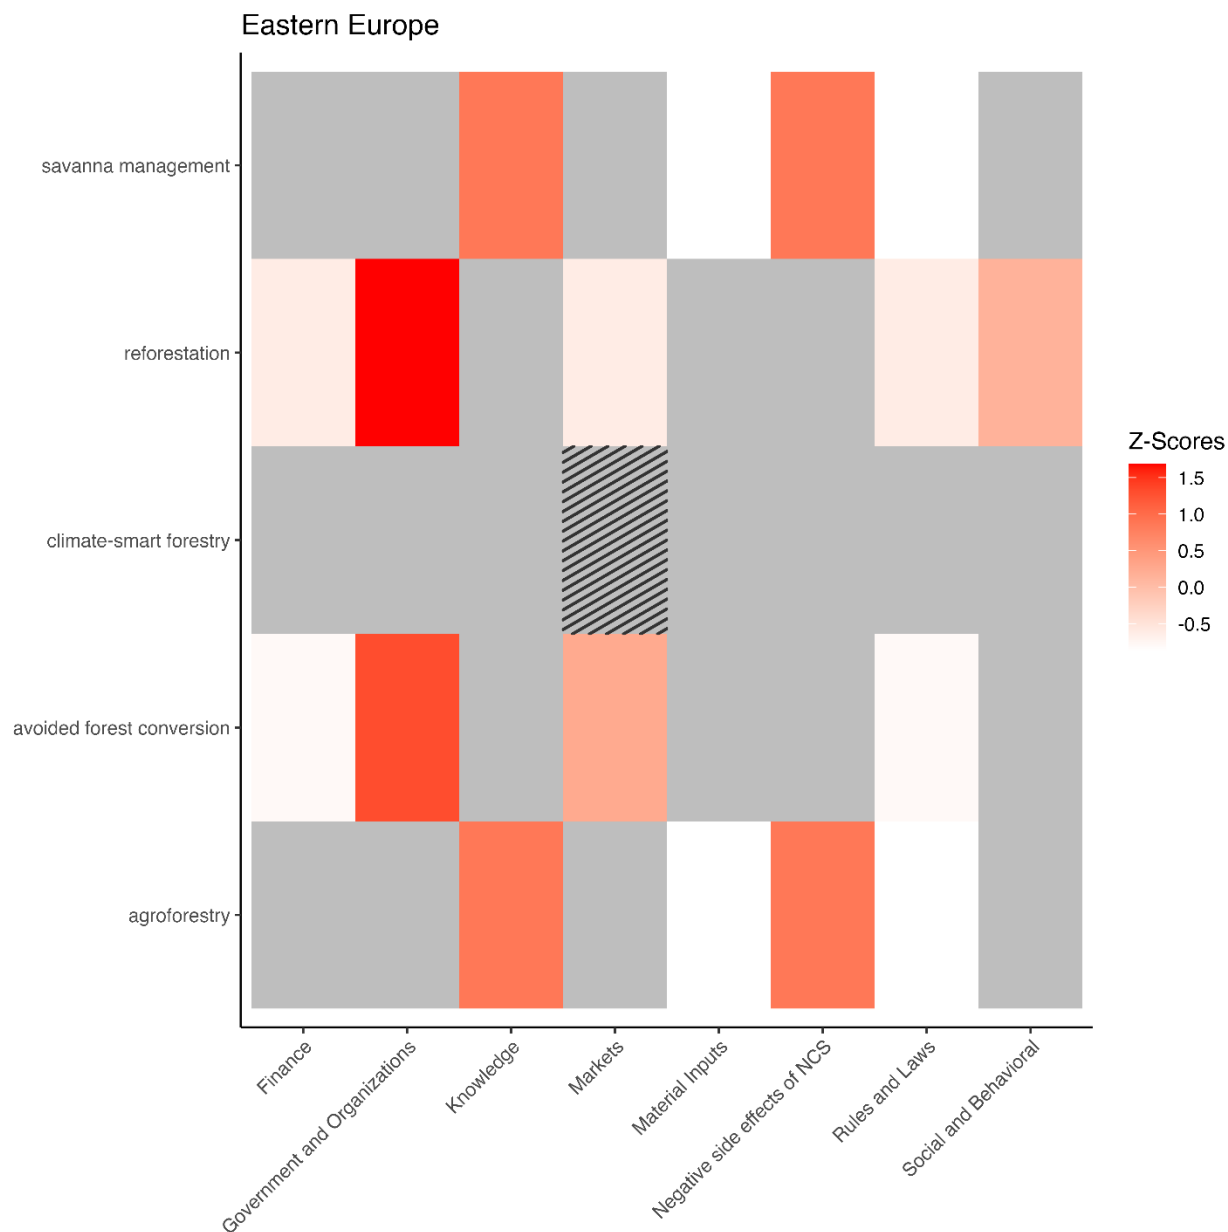

**Fig. S17 (continued). Pathway-level subregional z-score heatmaps for all 20 subregions with data.** Maps indicate the frequency with which a given constraint category was observed for a given pathway in a subregion compared to the mean frequency for all constraint categories for the pathway in that subregion, expressed as the number of standard deviations from the mean. Maps are color-coded at the pathway level. Grey indicates no data. Hashing indicates undefined z-score (standard deviation = 0).

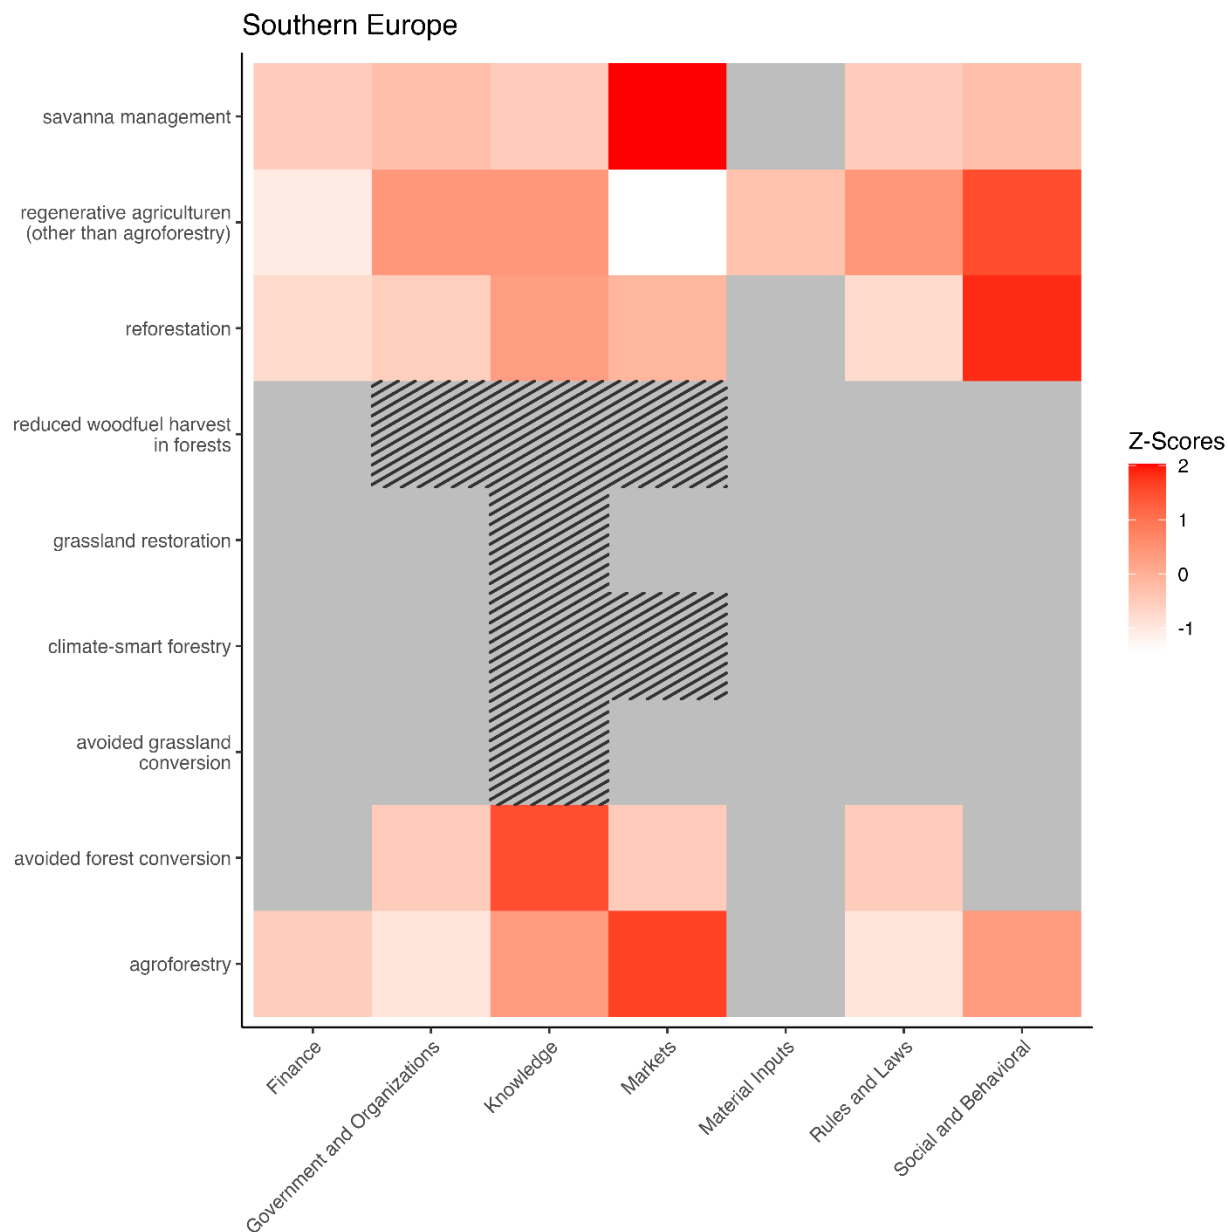

**Fig. S17 (continued). Pathway-level subregional z-score heatmaps for all 20 subregions with data.** Maps indicate the frequency with which a given constraint category was observed for a given pathway in a subregion compared to the mean frequency for all constraint categories for the pathway in that subregion, expressed as the number of standard deviations from the mean. Maps are color-coded at the pathway level. Grey indicates no data. Hashing indicates undefined z-score (standard deviation = 0).

| NCS Pathway                         | Availability of technical advice for land managers | Aversion to trying new land uses | Burdensome reporting requirements | Concerns over negative equity impacts of NCS | Difficulty identifying, engaging, or coordinating with relevant actors | Financial or other incentives for non-NCS | Greater profitability of alternative land uses | Information about how to design or begin the NCS | Information about how to manage the NCS | Information about market access or prices | Information about on-site benefits of NCS | Information about yields, inputs, or profits | Insecure or uncertain NCS benefit sharing | Insecure or uncertain rights to manage or sell property | Insecure, uncertain, or lack of rights to use natural resources | Labor (external or own) for the NCS | Lack of dispute resolution | Lack of opportunity to participate in or influence the implementation of NCS due to gender, race, ethnicity, or other dimensions of identity | Lack of policy coordination or implementation capacity | Land manager access to credit for NCS | Land manager access to other funding for NCS | Land manager insurance for NCS assets or outputs | Land manager literacy, numeracy, or technological capabilities | Limited social learning or exchange networks for NCS | Local preferences for non-NCS land uses | Markets for NCS outputs produced by land managers | Markets for carbon sequestered by the NCS | Markets for ecosystem services or biodiversity provided by the NCS | NCS-related corruption | Negative side effects of NCS | Planting stock or other materials for the NCS | Politically influential interests favoring non-NCS | Prices for NCS outputs produced by land managers | Prices for carbon sequestered by the NCS | Prices for ecosystem services or biodiversity provided by the NCS | Project access to credit for NCS | Project access to other funding for NCS | Regulatory barriers to production, transport, or sale of NCS outputs | Scepticism or disinterest in NCS or lack of trust in NCS promoters | Social norms favoring non-NCS land uses | Suitable land for the NCS | Uncertain, or lack of, enforcement of environmental laws | Unclear laws and policies related to NCS outputs/markets | Violent conflict or perceived threat of violence | Water for the NCS | Weak monitoring or enforcement of NCS agreements |   |   |
|-------------------------------------|----------------------------------------------------|----------------------------------|-----------------------------------|----------------------------------------------|------------------------------------------------------------------------|-------------------------------------------|------------------------------------------------|--------------------------------------------------|-----------------------------------------|-------------------------------------------|-------------------------------------------|----------------------------------------------|-------------------------------------------|---------------------------------------------------------|-----------------------------------------------------------------|-------------------------------------|----------------------------|----------------------------------------------------------------------------------------------------------------------------------------------|--------------------------------------------------------|---------------------------------------|----------------------------------------------|--------------------------------------------------|----------------------------------------------------------------|------------------------------------------------------|-----------------------------------------|---------------------------------------------------|-------------------------------------------|--------------------------------------------------------------------|------------------------|------------------------------|-----------------------------------------------|----------------------------------------------------|--------------------------------------------------|------------------------------------------|-------------------------------------------------------------------|----------------------------------|-----------------------------------------|----------------------------------------------------------------------|--------------------------------------------------------------------|-----------------------------------------|---------------------------|----------------------------------------------------------|----------------------------------------------------------|--------------------------------------------------|-------------------|--------------------------------------------------|---|---|
| Savanna management                  | 26                                                 | 5                                | 7                                 | 18                                           | 22                                                                     | 32                                        | 47                                             | 26                                               | 14                                      | 15                                        | 18                                        | 13                                           | 35                                        | 21                                                      | 26                                                              | 20                                  | 27                         | 107                                                                                                                                          | 23                                                     | 48                                    | 9                                            | 18                                               | 39                                                             | 15                                                   | 14                                      | 2                                                 | 34                                        | 2                                                                  | 9                      | 13                           | 20                                            | 2                                                  | 1                                                | 11                                       | 15                                                                | 37                               | 21                                      | 48                                                                   | 13                                                                 | 53                                      | 15                        | 0                                                        | 15                                                       | 15                                               |                   |                                                  |   |   |
| Regen. agric. (excl. agroforestry)  | 34                                                 | 30                               | 23                                | 32                                           | 31                                                                     | 54                                        | 29                                             | 40                                               | 38                                      | 52                                        | 31                                        | 31                                           | 29                                        | 40                                                      | 37                                                              | 37                                  | 13                         | 25                                                                                                                                           | 65                                                     | 56                                    | 58                                           | 36                                               | 39                                                             | 42                                                   | 42                                      | 41                                                | 23                                        | 36                                                                 | 9                      | 0                            | 44                                            | 32                                                 | 0                                                | 21                                       | 43                                                                | 32                               | 53                                      | 42                                                                   | 24                                                                 | 32                                      | 27                        | 51                                                       | 56                                                       | 13                                               | 42                | 50                                               |   |   |
| Reforestation                       | 98                                                 | 67                               | 34                                | 135                                          | 84                                                                     | 113                                       | 129                                            | 122                                              | 127                                     | 102                                       | 89                                        | 65                                           | 55                                        | 112                                                     | 85                                                              | 99                                  | 61                         | 60                                                                                                                                           | 282                                                    | 110                                   | 123                                          | 59                                               | 95                                                             | 114                                                  | 119                                     | 90                                                | 59                                        | 65                                                                 | 22                     | 38                           | 114                                           | 94                                                 | 4                                                | 61                                       | 75                                                                | 67                               | 149                                     | 104                                                                  | 205                                                                | 61                                      | 58                        | 175                                                      | 99                                                       | 42                                               | 83                | 116                                              |   |   |
| Reduced woodfuel harvest in forests | 1                                                  | 0                                | 0                                 | 0                                            | 1                                                                      | 0                                         | 0                                              | 0                                                | 0                                       | 0                                         | 0                                         | 0                                            | 0                                         | 0                                                       | 1                                                               | 0                                   | 0                          | 0                                                                                                                                            | 0                                                      | 0                                     | 0                                            | 0                                                | 0                                                              | 0                                                    | 2                                       | 0                                                 | 0                                         | 1                                                                  | 0                      | 0                            | 0                                             | 0                                                  | 1                                                | 0                                        | 0                                                                 | 0                                | 1                                       | 0                                                                    | 0                                                                  | 0                                       | 1                         | 0                                                        | 0                                                        | 0                                                | 2                 | 0                                                | 0 | 0 |
| Peatland restoration                | 7                                                  | 3                                | 4                                 | 5                                            | 4                                                                      | 6                                         | 9                                              | 7                                                | 6                                       | 7                                         | 6                                         | 1                                            | 4                                         | 4                                                       | 4                                                               | 2                                   | 4                          | 7                                                                                                                                            | 9                                                      | 1                                     | 4                                            | 1                                                | 2                                                              | 5                                                    | 5                                       | 7                                                 | 5                                         | 2                                                                  | 1                      | 3                            | 3                                             | 5                                                  | 0                                                | 4                                        | 3                                                                 | 2                                | 4                                       | 5                                                                    | 8                                                                  | 4                                       | 3                         | 8                                                        | 5                                                        | 2                                                | 1                 | 2                                                |   |   |
| Grassland restoration               | 12                                                 | 17                               | 11                                | 18                                           | 16                                                                     | 24                                        | 18                                             | 20                                               | 24                                      | 25                                        | 17                                        | 19                                           | 11                                        | 17                                                      | 16                                                              | 22                                  | 7                          | 15                                                                                                                                           | 34                                                     | 14                                    | 18                                           | 6                                                | 19                                                             | 17                                                   | 20                                      | 23                                                | 14                                        | 17                                                                 | 0                      | 2                            | 18                                            | 15                                                 | 0                                                | 12                                       | 19                                                                | 18                               | 25                                      | 22                                                                   | 12                                                                 | 16                                      | 18                        | 23                                                       | 27                                                       | 5                                                | 17                | 19                                               |   |   |
| Coastal wetland restoration         | 12                                                 | 22                               | 4                                 | 3                                            | 3                                                                      | 6                                         | 28                                             | 66                                               | 9                                       | 14                                        | 14                                        | 10                                           | 6                                         | 3                                                       | 3                                                               | 5                                   | 4                          | 2                                                                                                                                            | 28                                                     | 5                                     | 11                                           | 2                                                | 20                                                             | 10                                                   | 16                                      | 10                                                | 14                                        | 17                                                                 | 0                      | 6                            | 10                                            | 6                                                  | 0                                                | 17                                       | 20                                                                | 5                                | 29                                      | 6                                                                    | 22                                                                 | 6                                       | 11                        | 10                                                       | 1                                                        | 4                                                | 4                 |                                                  |   |   |
| Climate-smart forestry              | 23                                                 | 22                               | 14                                | 26                                           | 23                                                                     | 29                                        | 22                                             | 26                                               | 44                                      | 27                                        | 19                                        | 22                                           | 15                                        | 21                                                      | 18                                                              | 23                                  | 9                          | 18                                                                                                                                           | 45                                                     | 24                                    | 32                                           | 21                                               | 30                                                             | 24                                                   | 23                                      | 26                                                | 21                                        | 19                                                                 | 11                     | 2                            | 19                                            | 18                                                 | 2                                                | 27                                       | 21                                                                | 21                               | 30                                      | 32                                                                   | 16                                                                 | 21                                      | 18                        | 27                                                       | 26                                                       | 18                                               | 27                |                                                  |   |   |
| Avoided peatland conversion         | 14                                                 | 5                                | 6                                 | 4                                            | 13                                                                     | 13                                        | 5                                              | 17                                               | 15                                      | 6                                         | 6                                         | 12                                           | 12                                        | 6                                                       | 5                                                               | 10                                  | 3                          | 5                                                                                                                                            | 12                                                     | 11                                    | 15                                           | 4                                                | 13                                                             | 15                                                   | 4                                       | 6                                                 | 5                                         | 6                                                                  | 3                      | 0                            | 3                                             | 14                                                 | 0                                                | 4                                        | 5                                                                 | 13                               | 13                                      | 6                                                                    | 8                                                                  | 13                                      | 3                         | 15                                                       | 6                                                        | 0                                                | 0                 | 11                                               |   |   |
| Avoided grassland conversion        | 4                                                  | 4                                | 1                                 | 3                                            | 4                                                                      | 11                                        | 17                                             | 3                                                | 1                                       | 2                                         | 3                                         | 1                                            | 2                                         | 6                                                       | 6                                                               | 4                                   | 0                          | 2                                                                                                                                            | 15                                                     | 7                                     | 10                                           | 6                                                | 2                                                              | 6                                                    | 4                                       | 2                                                 | 4                                         | 9                                                                  | 0                      | 0                            | 7                                             | 10                                                 | 0                                                | 11                                       | 6                                                                 | 4                                | 6                                       | 6                                                                    | 4                                                                  | 4                                       | 7                         | 4                                                        | 12                                                       | 0                                                | 6                 | 4                                                |   |   |
| Avoided forest conversion           | 52                                                 | 26                               | 13                                | 29                                           | 58                                                                     | 54                                        | 84                                             | 42                                               | 44                                      | 48                                        | 28                                        | 29                                           | 32                                        | 57                                                      | 35                                                              | 39                                  | 24                         | 40                                                                                                                                           | 127                                                    | 48                                    | 67                                           | 15                                               | 49                                                             | 48                                                   | 71                                      | 38                                                | 42                                        | 35                                                                 | 14                     | 28                           | 34                                            | 54                                                 | 10                                               | 57                                       | 43                                                                | 30                               | 61                                      | 41                                                                   | 51                                                                 | 32                                      | 23                        | 114                                                      | 42                                                       | 14                                               | 21                | 78                                               |   |   |
| Avoided coastal wetland conversion  | 20                                                 | 9                                | 5                                 | 5                                            | 12                                                                     | 14                                        | 19                                             | 36                                               | 17                                      | 6                                         | 10                                        | 13                                           | 13                                        | 4                                                       | 5                                                               | 11                                  | 3                          | 3                                                                                                                                            | 14                                                     | 11                                    | 17                                           | 1                                                | 19                                                             | 13                                                   | 17                                      | 5                                                 | 8                                         | 9                                                                  | 2                      | 5                            | 8                                             | 13                                                 | 0                                                | 9                                        | 11                                                                | 12                               | 20                                      | 4                                                                    | 13                                                                 | 14                                      | 9                         | 13                                                       | 8                                                        | 0                                                | 2                 | 12                                               |   |   |
| Aero forestry                       | 110                                                | 33                               | 24                                | 33                                           | 45                                                                     | 65                                        | 67                                             | 111                                              | 87                                      | 63                                        | 68                                        | 53                                           | 36                                        | 87                                                      | 56                                                              | 72                                  | 55                         | 59                                                                                                                                           | 251                                                    | 96                                    | 127                                          | 39                                               | 67                                                             | 102                                                  | 59                                      | 78                                                | 31                                        | 66                                                                 | 12                     | 48                           | 90                                            | 35                                                 | 16                                               | 29                                       | 43                                                                | 38                               | 110                                     | 62                                                                   | 127                                                                | 37                                      | 41                        | 138                                                      | 53                                                       | 25                                               | 54                | 56                                               |   |   |

**Fig. S18. Frequency counts of individual constraint observations by NCS pathway.** Color-coded at the pathway level, with darker shading indicating higher counts. Thick borders and boldface indicate the most frequently observed constraint for each pathway; thin borders and boldface, the second-most frequently observed constraint for each pathway; boldface without borders indicates third-most frequently observed constraint for each pathway.

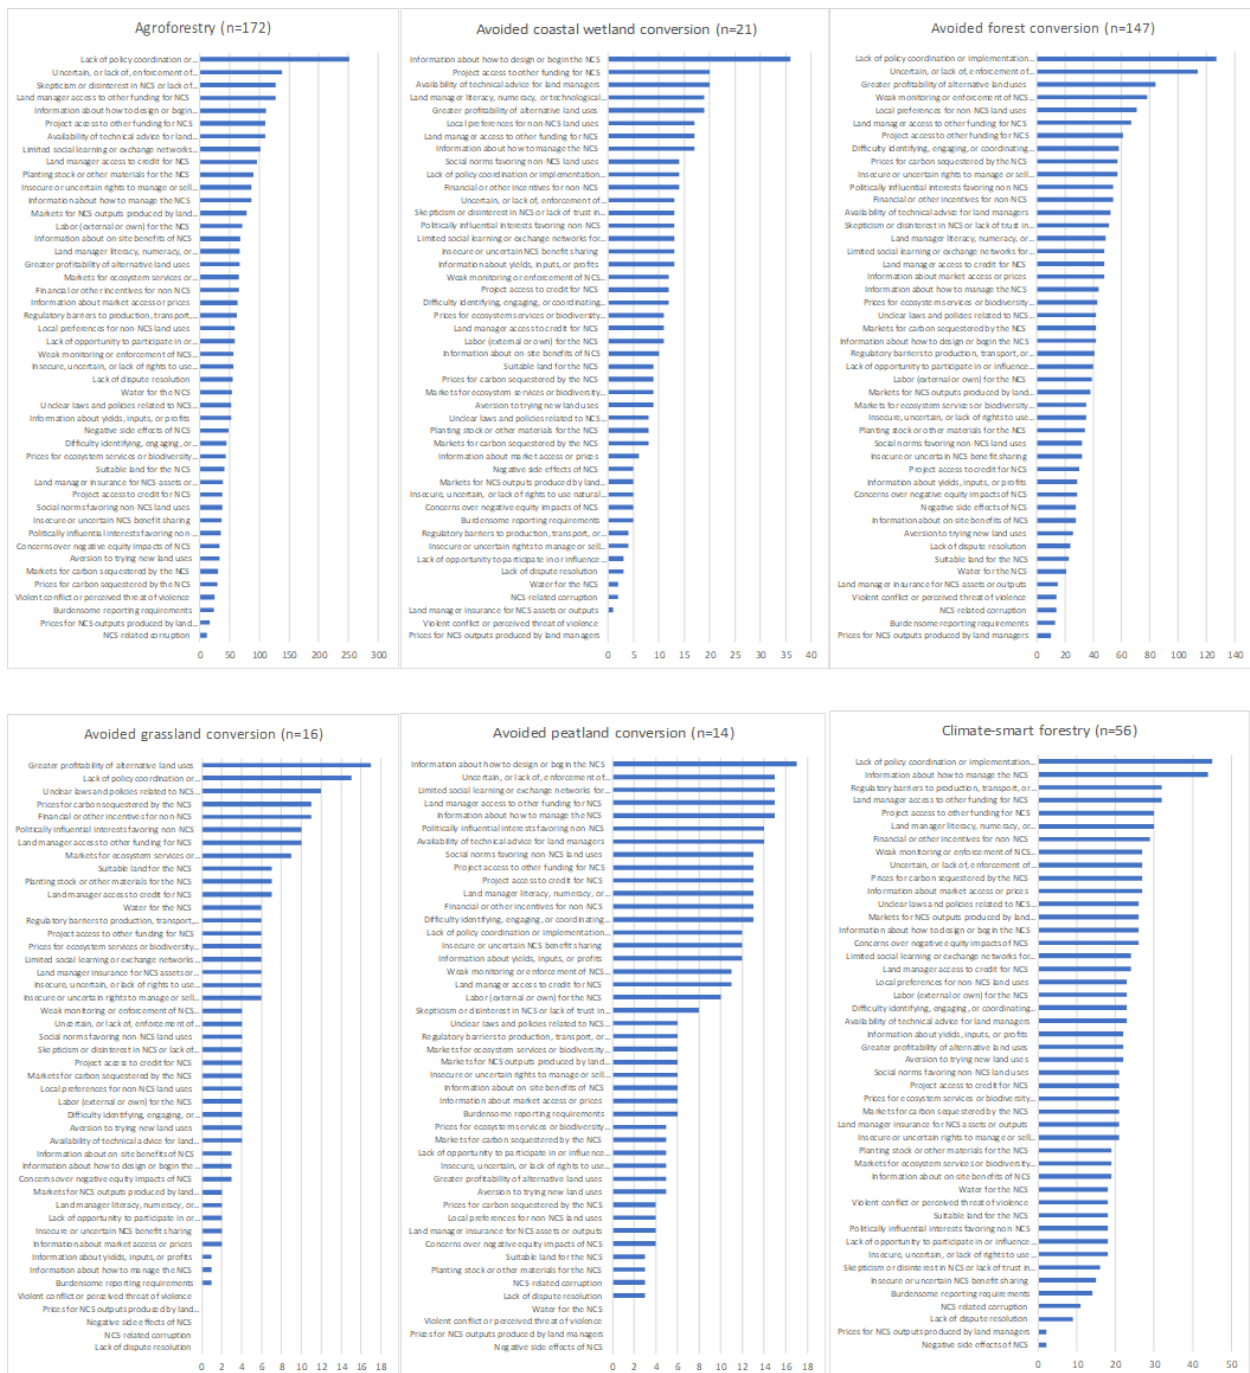

**Fig. S19. Frequency counts of individual constraints by pathway.** Combined number (n) of papers and surveys for each pathway shown in parentheses after pathway names. Note different x-axis scales.

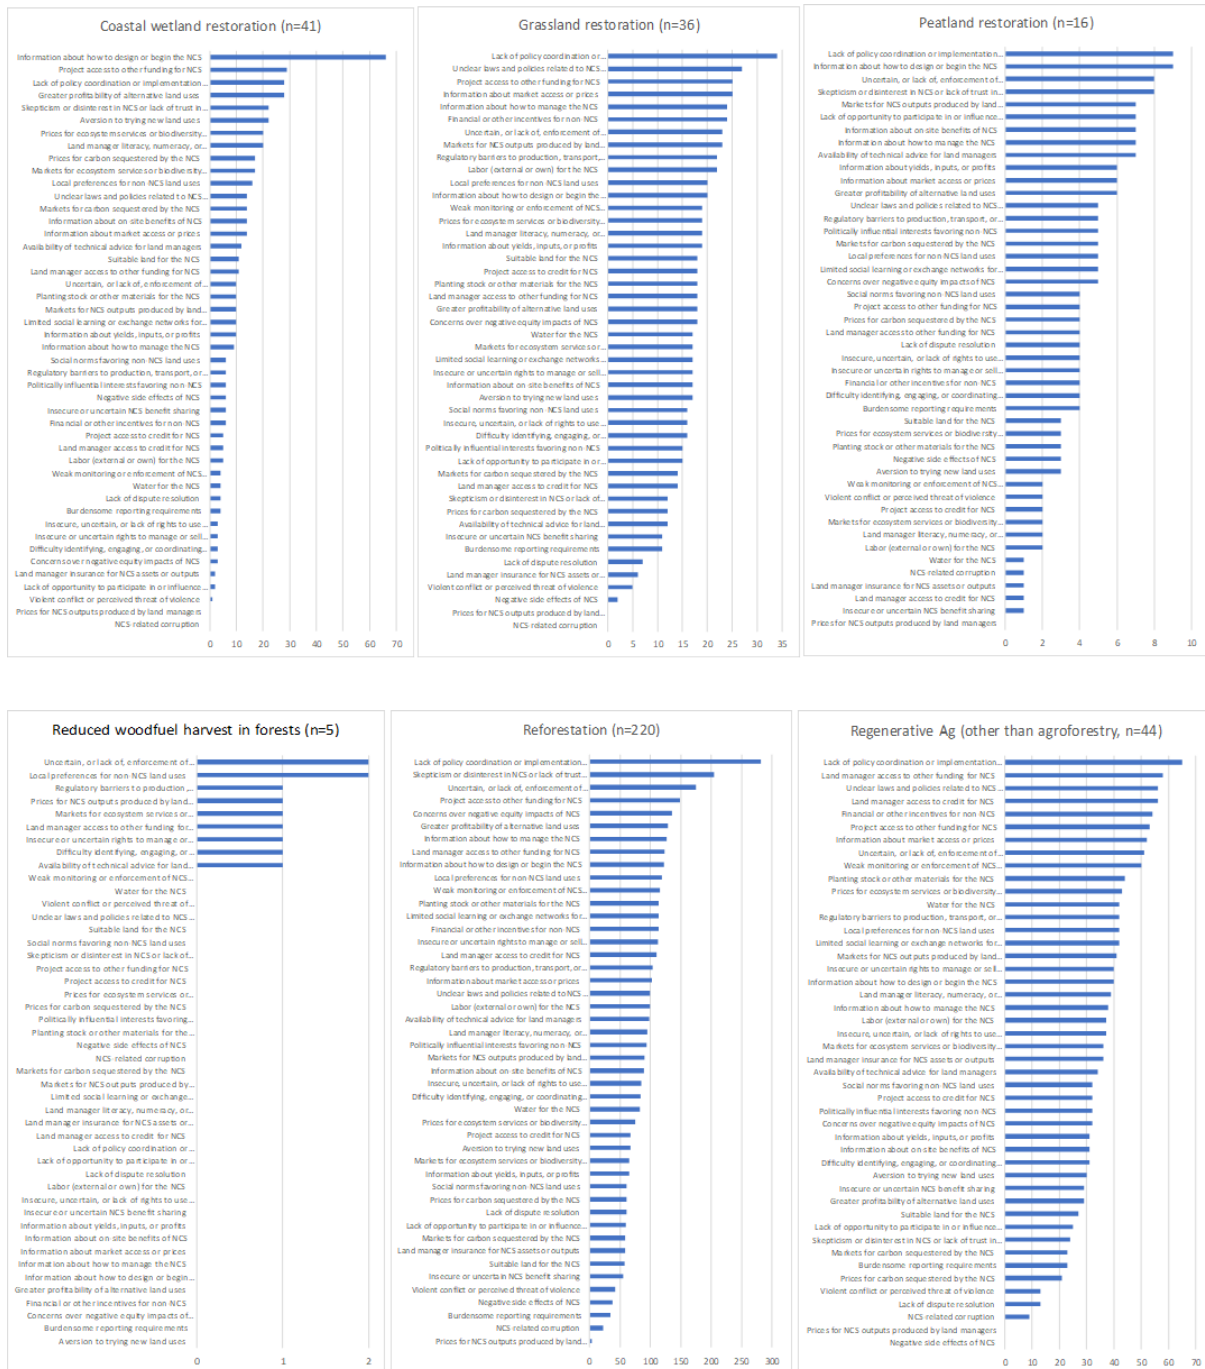

**Fig. S19 (continued). Frequency counts of individual constraints by pathway.** Combined number (n) of papers and surveys for each pathway shown in parentheses after pathway names. Note different x-axis scales.



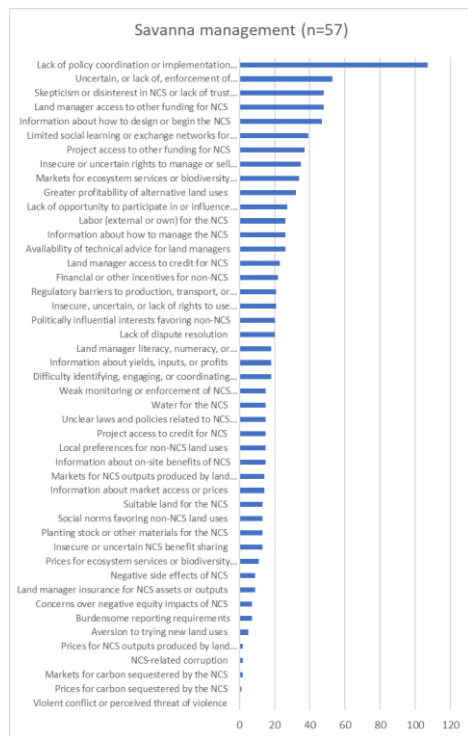

**Fig. S19 (continued). Frequency counts of individual constraints by pathway.** Combined number (n) of papers and surveys for each pathway shown in parentheses after pathway names. Note different x-axis scales.



|                           | Availability of technical advice for land managers<br>Aversion to trying new land uses<br>Burdenome reporting requirements<br>Concerns over negative equity impacts of NCS<br>Difficulty identifying, engaging, or coordinating with relevant actors<br>Financial or other incentives for non-NCS<br>Greater profitability of alternative land uses<br>Information about how to design or begin the NCS<br>Information about how to manage the NCS<br>Information about market access or prices<br>Information about on-site benefits of NCS<br>Information about yields, inputs, or profits<br>Insecure or uncertain NCS benefit sharing<br>Insecure, uncertain, or lack of rights to use natural resources<br>Labor (external or own) for the NCS<br>Lack of dispute resolution<br>Lack of opportunity to participate in or influence the implementation of NCS<br>due to gender, race, ethnicity, or other dimensions of identity<br>Lack of policy coordination or implementation capacity<br>Land manager access to credit for NCS<br>Land manager access to other funding for NCS<br>Land manager insurance for NCS assets or outputs<br>Land manager literacy, numeracy, or technological capabilities<br>Limited social learning or exchange networks for NCS<br>Local preferences for non-NCS land uses<br>Markets for NCS outputs produced by land managers<br>Markets for carbon sequestered by the NCS<br>Markets for ecosystem services or biodiversity provided by the NCS<br>NCS-related corruption<br>Negative side effects of NCS<br>Planting stock or other materials for the NCS<br>Politically influential interests favoring non-NCS<br>Prices for NCS outputs produced by land managers<br>Prices for carbon sequestered by the NCS<br>Prices for ecosystem services or biodiversity provided by the NCS<br>Project access to credit for NCS<br>Project access to other funding for NCS<br>Regulatory barriers to production, transport, or sale of NCS outputs<br>Skepticism or disinterest in NCS or lack of trust in NCS promoters<br>Social norms favoring non-NCS land uses<br>Suitable land for the NCS<br>Uncertain, or lack of, enforcement of environmental laws<br>Unclear laws and policies related to NCS outputs/markets<br>Violent conflict or perceived threat of violence<br>Water for the NCS<br>Weak monitoring or enforcement of NCS agreements |    |    |    |    |     |     |     |     |     |    |    |    |     |    |    |    |     |     |     |     |    |     |     |    |     |    |    |    |    |     |    |    |    |    |     |     |     |     |    |    |     |    |    |    |     |   |
|---------------------------|------------------------------------------------------------------------------------------------------------------------------------------------------------------------------------------------------------------------------------------------------------------------------------------------------------------------------------------------------------------------------------------------------------------------------------------------------------------------------------------------------------------------------------------------------------------------------------------------------------------------------------------------------------------------------------------------------------------------------------------------------------------------------------------------------------------------------------------------------------------------------------------------------------------------------------------------------------------------------------------------------------------------------------------------------------------------------------------------------------------------------------------------------------------------------------------------------------------------------------------------------------------------------------------------------------------------------------------------------------------------------------------------------------------------------------------------------------------------------------------------------------------------------------------------------------------------------------------------------------------------------------------------------------------------------------------------------------------------------------------------------------------------------------------------------------------------------------------------------------------------------------------------------------------------------------------------------------------------------------------------------------------------------------------------------------------------------------------------------------------------------------------------------------------------------------------------------------------------------------------------------------------------------------------------------------------------------------------------------------------------------------------|----|----|----|----|-----|-----|-----|-----|-----|----|----|----|-----|----|----|----|-----|-----|-----|-----|----|-----|-----|----|-----|----|----|----|----|-----|----|----|----|----|-----|-----|-----|-----|----|----|-----|----|----|----|-----|---|
| Northern America          | 34                                                                                                                                                                                                                                                                                                                                                                                                                                                                                                                                                                                                                                                                                                                                                                                                                                                                                                                                                                                                                                                                                                                                                                                                                                                                                                                                                                                                                                                                                                                                                                                                                                                                                                                                                                                                                                                                                                                                                                                                                                                                                                                                                                                                                                                                                                                                                                                       | 14 | 3  | 9  | 31 | 9   | 31  | 35  | 20  | 21  | 27 | 11 | 17 | 6   | 7  | 28 | 2  | 10  | 40  | 9   | 35  | 7  | 12  | 21  | 14 | 17  | 8  | 27 | 0  | 7  | 17  | 10 | 0  | 20 | 20 | 7   | 22  | 7   | 35  | 20 | 10 | 10  | 24 | 2  | 2  | 3   |   |
| Central America           | 42                                                                                                                                                                                                                                                                                                                                                                                                                                                                                                                                                                                                                                                                                                                                                                                                                                                                                                                                                                                                                                                                                                                                                                                                                                                                                                                                                                                                                                                                                                                                                                                                                                                                                                                                                                                                                                                                                                                                                                                                                                                                                                                                                                                                                                                                                                                                                                                       | 26 | 11 | 36 | 28 | 30  | 35  | 80  | 44  | 33  | 27 | 18 | 16 | 35  | 9  | 28 | 55 | 29  | 161 | 25  | 34  | 22 | 42  | 54  | 40 | 28  | 18 | 38 | 2  | 0  | 24  | 22 | 3  | 21 | 24 | 11  | 47  | 33  | 73  | 16 | 26 | 93  | 34 | 1  | 21 | 32  |   |
| South America             | 49                                                                                                                                                                                                                                                                                                                                                                                                                                                                                                                                                                                                                                                                                                                                                                                                                                                                                                                                                                                                                                                                                                                                                                                                                                                                                                                                                                                                                                                                                                                                                                                                                                                                                                                                                                                                                                                                                                                                                                                                                                                                                                                                                                                                                                                                                                                                                                                       | 39 | 21 | 25 | 40 | 67  | 111 | 108 | 71  | 57  | 57 | 51 | 25 | 107 | 49 | 29 | 72 | 14  | 264 | 50  | 53  | 2  | 21  | 87  | 71 | 65  | 72 | 39 | 10 | 4  | 60  | 67 | 8  | 46 | 45 | 21  | 107 | 51  | 154 | 36 | 46 | 219 | 56 | 15 | 27 | 88  |   |
| Caribbean                 | 12                                                                                                                                                                                                                                                                                                                                                                                                                                                                                                                                                                                                                                                                                                                                                                                                                                                                                                                                                                                                                                                                                                                                                                                                                                                                                                                                                                                                                                                                                                                                                                                                                                                                                                                                                                                                                                                                                                                                                                                                                                                                                                                                                                                                                                                                                                                                                                                       | 10 | 4  | 8  | 11 | 11  | 6   | 16  | 12  | 11  | 15 | 11 | 6  | 6   | 10 | 7  | 6  | 7   | 11  | 1   | 16  | 7  | 12  | 8   | 6  | 7   | 7  | 6  | 0  | 0  | 6   | 4  | 0  | 6  | 6  | 6   | 11  | 12  | 10  | 6  | 11 | 12  | 12 | 1  | 10 | 7   |   |
| Western Asia              | 0                                                                                                                                                                                                                                                                                                                                                                                                                                                                                                                                                                                                                                                                                                                                                                                                                                                                                                                                                                                                                                                                                                                                                                                                                                                                                                                                                                                                                                                                                                                                                                                                                                                                                                                                                                                                                                                                                                                                                                                                                                                                                                                                                                                                                                                                                                                                                                                        | 0  | 0  | 4  | 0  | 0   | 8   | 8   | 6   | 0   | 6  | 0  | 0  | 0   | 0  | 0  | 0  | 6   | 6   | 0   | 0   | 0  | 0   | 0   | 6  | 0   | 10 | 0  | 0  | 0  | 0   | 0  | 0  | 0  | 0  | 0   | 0   | 0   | 0   | 0  | 0  | 0   | 0  | 0  | 0  | 0   |   |
| Central Asia              | 1                                                                                                                                                                                                                                                                                                                                                                                                                                                                                                                                                                                                                                                                                                                                                                                                                                                                                                                                                                                                                                                                                                                                                                                                                                                                                                                                                                                                                                                                                                                                                                                                                                                                                                                                                                                                                                                                                                                                                                                                                                                                                                                                                                                                                                                                                                                                                                                        | 0  | 0  | 4  | 0  | 0   | 0   | 0   | 0   | 0   | 0  | 0  | 0  | 0   | 0  | 0  | 0  | 0   | 2   | 0   | 0   | 0  | 0   | 0   | 0  | 0   | 0  | 0  | 0  | 0  | 0   | 0  | 0  | 0  | 0  | 0   | 0   | 0   | 2   | 0  | 1  | 0   | 0  | 0  | 0  |     |   |
| Eastern Asia              | 15                                                                                                                                                                                                                                                                                                                                                                                                                                                                                                                                                                                                                                                                                                                                                                                                                                                                                                                                                                                                                                                                                                                                                                                                                                                                                                                                                                                                                                                                                                                                                                                                                                                                                                                                                                                                                                                                                                                                                                                                                                                                                                                                                                                                                                                                                                                                                                                       | 24 | 6  | 8  | 3  | 10  | 38  | 36  | 22  | 9   | 41 | 7  | 3  | 5   | 4  | 12 | 7  | 2   | 43  | 9   | 17  | 8  | 17  | 11  | 15 | 4   | 12 | 11 | 1  | 1  | 14  | 24 | 0  | 10 | 21 | 4   | 31  | 3   | 85  | 6  | 13 | 7   | 11 | 0  | 7  |     |   |
| Southern Asia             | 16                                                                                                                                                                                                                                                                                                                                                                                                                                                                                                                                                                                                                                                                                                                                                                                                                                                                                                                                                                                                                                                                                                                                                                                                                                                                                                                                                                                                                                                                                                                                                                                                                                                                                                                                                                                                                                                                                                                                                                                                                                                                                                                                                                                                                                                                                                                                                                                       | 3  | 2  | 9  | 12 | 11  | 8   | 7   | 19  | 8   | 5  | 5  | 13 | 9   | 8  | 4  | 0  | 15  | 39  | 4   | 17  | 3  | 13  | 14  | 22 | 14  | 6  | 6  | 13 | 24 | 13  | 1  | 3  | 22 | 10 | 6   | 8   | 22  | 13  | 1  | 4  | 5   | 3  | 0  | 4  | 9   |   |
| South-Eastern Asia        | 33                                                                                                                                                                                                                                                                                                                                                                                                                                                                                                                                                                                                                                                                                                                                                                                                                                                                                                                                                                                                                                                                                                                                                                                                                                                                                                                                                                                                                                                                                                                                                                                                                                                                                                                                                                                                                                                                                                                                                                                                                                                                                                                                                                                                                                                                                                                                                                                       | 11 | 8  | 15 | 14 | 11  | 60  | 37  | 28  | 11  | 21 | 11 | 11 | 10  | 12 | 31 | 12 | 19  | 67  | 26  | 41  | 6  | 17  | 20  | 19 | 20  | 10 | 10 | 14 | 25 | 18  | 16 | 30 | 14 | 11 | 28  | 19  | 36  | 14  | 4  | 23 | 18  | 4  | 0  | 13 |     |   |
| Australia and New Zealand | 8                                                                                                                                                                                                                                                                                                                                                                                                                                                                                                                                                                                                                                                                                                                                                                                                                                                                                                                                                                                                                                                                                                                                                                                                                                                                                                                                                                                                                                                                                                                                                                                                                                                                                                                                                                                                                                                                                                                                                                                                                                                                                                                                                                                                                                                                                                                                                                                        | 3  | 3  | 7  | 6  | 7   | 9   | 3   | 0   | 3   | 1  | 4  | 0  | 3   | 3  | 8  | 3  | 0   | 16  | 3   | 10  | 0  | 6   | 0   | 11 | 0   | 3  | 11 | 0  | 26 | 0   | 6  | 0  | 12 | 10 | 7   | 19  | 5   | 3   | 8  | 11 | 0   | 7  | 0  | 0  | 3   |   |
| Melanesia                 | 1                                                                                                                                                                                                                                                                                                                                                                                                                                                                                                                                                                                                                                                                                                                                                                                                                                                                                                                                                                                                                                                                                                                                                                                                                                                                                                                                                                                                                                                                                                                                                                                                                                                                                                                                                                                                                                                                                                                                                                                                                                                                                                                                                                                                                                                                                                                                                                                        | 0  | 0  | 0  | 0  | 1   | 1   | 3   | 1   | 1   | 16 | 1  | 0  | 0   | 0  | 1  | 1  | 0   | 1   | 1   | 1   | 0  | 1   | 1   | 0  | 1   | 1  | 0  | 15 | 1  | 0   | 0  | 1  | 1  | 0  | 1   | 1   | 0   | 0   | 0  | 1  | 1   | 1  | 0  | 1  | 1   |   |
| Northern Africa           | 1                                                                                                                                                                                                                                                                                                                                                                                                                                                                                                                                                                                                                                                                                                                                                                                                                                                                                                                                                                                                                                                                                                                                                                                                                                                                                                                                                                                                                                                                                                                                                                                                                                                                                                                                                                                                                                                                                                                                                                                                                                                                                                                                                                                                                                                                                                                                                                                        | 0  | 4  | 4  | 4  | 0   | 10  | 4   | 1   | 4   | 0  | 4  | 4  | 4   | 4  | 0  | 0  | 0   | 4   | 5   | 5   | 5  | 0   | 0   | 4  | 0   | 10 | 4  | 14 | 0  | 0   | 4  | 0  | 1  | 4  | 4   | 4   | 0   | 4   | 0  | 0  | 4   | 4  | 0  | 4  | 0   | 4 |
| Western Africa            | 58                                                                                                                                                                                                                                                                                                                                                                                                                                                                                                                                                                                                                                                                                                                                                                                                                                                                                                                                                                                                                                                                                                                                                                                                                                                                                                                                                                                                                                                                                                                                                                                                                                                                                                                                                                                                                                                                                                                                                                                                                                                                                                                                                                                                                                                                                                                                                                                       | 49 | 45 | 63 | 50 | 84  | 70  | 80  | 69  | 75  | 34 | 58 | 54 | 90  | 93 | 65 | 9  | 41  | 116 | 121 | 114 | 93 | 73  | 80  | 64 | 48  | 18 | 52 | 7  | 8  | 77  | 66 | 3  | 12 | 66 | 55  | 98  | 107 | 42  | 58 | 58 | 97  | 96 | 25 | 94 | 86  |   |
| Eastern Africa            | 90                                                                                                                                                                                                                                                                                                                                                                                                                                                                                                                                                                                                                                                                                                                                                                                                                                                                                                                                                                                                                                                                                                                                                                                                                                                                                                                                                                                                                                                                                                                                                                                                                                                                                                                                                                                                                                                                                                                                                                                                                                                                                                                                                                                                                                                                                                                                                                                       | 56 | 33 | 79 | 85 | 137 | 32  | 95  | 115 | 127 | 44 | 74 | 56 | 109 | 89 | 99 | 30 | 112 | 159 | 129 | 140 | 49 | 138 | 111 | 90 | 113 | 60 | 60 | 31 | 20 | 111 | 71 | 0  | 60 | 74 | 106 | 130 | 74  | 44  | 67 | 41 | 129 | 90 | 58 | 99 | 114 |   |
| Central Africa            | 23                                                                                                                                                                                                                                                                                                                                                                                                                                                                                                                                                                                                                                                                                                                                                                                                                                                                                                                                                                                                                                                                                                                                                                                                                                                                                                                                                                                                                                                                                                                                                                                                                                                                                                                                                                                                                                                                                                                                                                                                                                                                                                                                                                                                                                                                                                                                                                                       | 1  | 5  | 11 | 22 | 23  | 5   | 19  | 19  | 1   | 6  | 19 | 19 | 6   | 5  | 24 | 5  | 3   | 22  | 23  | 24  | 1  | 19  | 23  | 1  | 5   | 4  | 5  | 2  | 1  | 5   | 19 | 1  | 7  | 0  | 19  | 23  | 5   | 3   | 19 | 4  | 26  | 5  | 9  | 5  | 23  |   |
| Southern Africa           | 0                                                                                                                                                                                                                                                                                                                                                                                                                                                                                                                                                                                                                                                                                                                                                                                                                                                                                                                                                                                                                                                                                                                                                                                                                                                                                                                                                                                                                                                                                                                                                                                                                                                                                                                                                                                                                                                                                                                                                                                                                                                                                                                                                                                                                                                                                                                                                                                        | 1  | 1  | 2  | 1  | 0   | 0   | 1   | 0   | 0   | 2  | 0  | 0  | 0   | 0  | 0  | 1  | 1   | 2   | 0   | 2   | 0  | 1   | 0   | 1  | 1   | 0  | 1  | 0  | 0  | 0   | 1  | 0  | 0  | 1  | 0   | 1   | 1   | 2   | 1  | 0  | 1   | 1  | 0  | 0  | 1   |   |
| Northern Europe           | 1                                                                                                                                                                                                                                                                                                                                                                                                                                                                                                                                                                                                                                                                                                                                                                                                                                                                                                                                                                                                                                                                                                                                                                                                                                                                                                                                                                                                                                                                                                                                                                                                                                                                                                                                                                                                                                                                                                                                                                                                                                                                                                                                                                                                                                                                                                                                                                                        | 0  | 0  | 3  | 0  | 4   | 16  | 2   | 5   | 0   | 1  | 1  | 0  | 1   | 1  | 6  | 0  | 0   | 7   | 0   | 11  | 0  | 0   | 0   | 6  | 0   | 5  | 0  | 0  | 8  | 3   | 0  | 0  | 1  | 0  | 2   | 0   | 7   | 0   | 0  | 0  | 0   | 0  | 0  | 1  |     |   |
| Western Europe            | 10                                                                                                                                                                                                                                                                                                                                                                                                                                                                                                                                                                                                                                                                                                                                                                                                                                                                                                                                                                                                                                                                                                                                                                                                                                                                                                                                                                                                                                                                                                                                                                                                                                                                                                                                                                                                                                                                                                                                                                                                                                                                                                                                                                                                                                                                                                                                                                                       | 5  | 0  | 7  | 3  | 0   | 5   | 0   | 2   | 0   | 3  | 1  | 0  | 0   | 0  | 2  | 0  | 8   | 0   | 6   | 0   | 0  | 1   | 1   | 0  | 0   | 4  | 0  | 3  | 2  | 5   | 0  | 0  | 0  | 0  | 0   | 5   | 1   | 11  | 0  | 1  | 0   | 0  | 0  | 0  | 0   |   |
| Eastern Europe            | 4                                                                                                                                                                                                                                                                                                                                                                                                                                                                                                                                                                                                                                                                                                                                                                                                                                                                                                                                                                                                                                                                                                                                                                                                                                                                                                                                                                                                                                                                                                                                                                                                                                                                                                                                                                                                                                                                                                                                                                                                                                                                                                                                                                                                                                                                                                                                                                                        | 0  | 0  | 1  | 0  | 4   | 2   | 0   | 0   | 4   | 0  | 0  | 0  | 0   | 0  | 0  | 4  | 0   | 5   | 0   | 2   | 0  | 0   | 0   | 1  | 0   | 0  | 0  | 0  | 8  | 0   | 2  | 0  | 0  | 2  | 0   | 0   | 2   | 0   | 0  | 0  | 0   | 0  | 0  | 0  | 0   | 0 |
| Southern Europe           | 15                                                                                                                                                                                                                                                                                                                                                                                                                                                                                                                                                                                                                                                                                                                                                                                                                                                                                                                                                                                                                                                                                                                                                                                                                                                                                                                                                                                                                                                                                                                                                                                                                                                                                                                                                                                                                                                                                                                                                                                                                                                                                                                                                                                                                                                                                                                                                                                       | 1  | 0  | 5  | 2  | 0   | 9   | 5   | 5   | 0   | 1  | 3  | 1  | 2   | 1  | 1  | 0  | 0   | 6   | 0   | 3   | 1  | 1   | 1   | 4  | 1   | 0  | 21 | 0  | 0  | 0   | 1  | 0  | 1  | 2  | 0   | 4   | 6   | 18  | 1  | 1  | 6   | 1  | 0  | 1  | 2   |   |

**Fig. S20. Frequency counts of individual constraint observations by UN sub-region.** Color-coded at the subregion level, with darker shading indicating higher counts. Thick borders and boldface indicate the most frequently observed constraint for each subregion; thin borders and boldface, the second-most frequently observed constraint for each subregion; boldface without borders indicates third-most frequently observed constraint for each subregion.

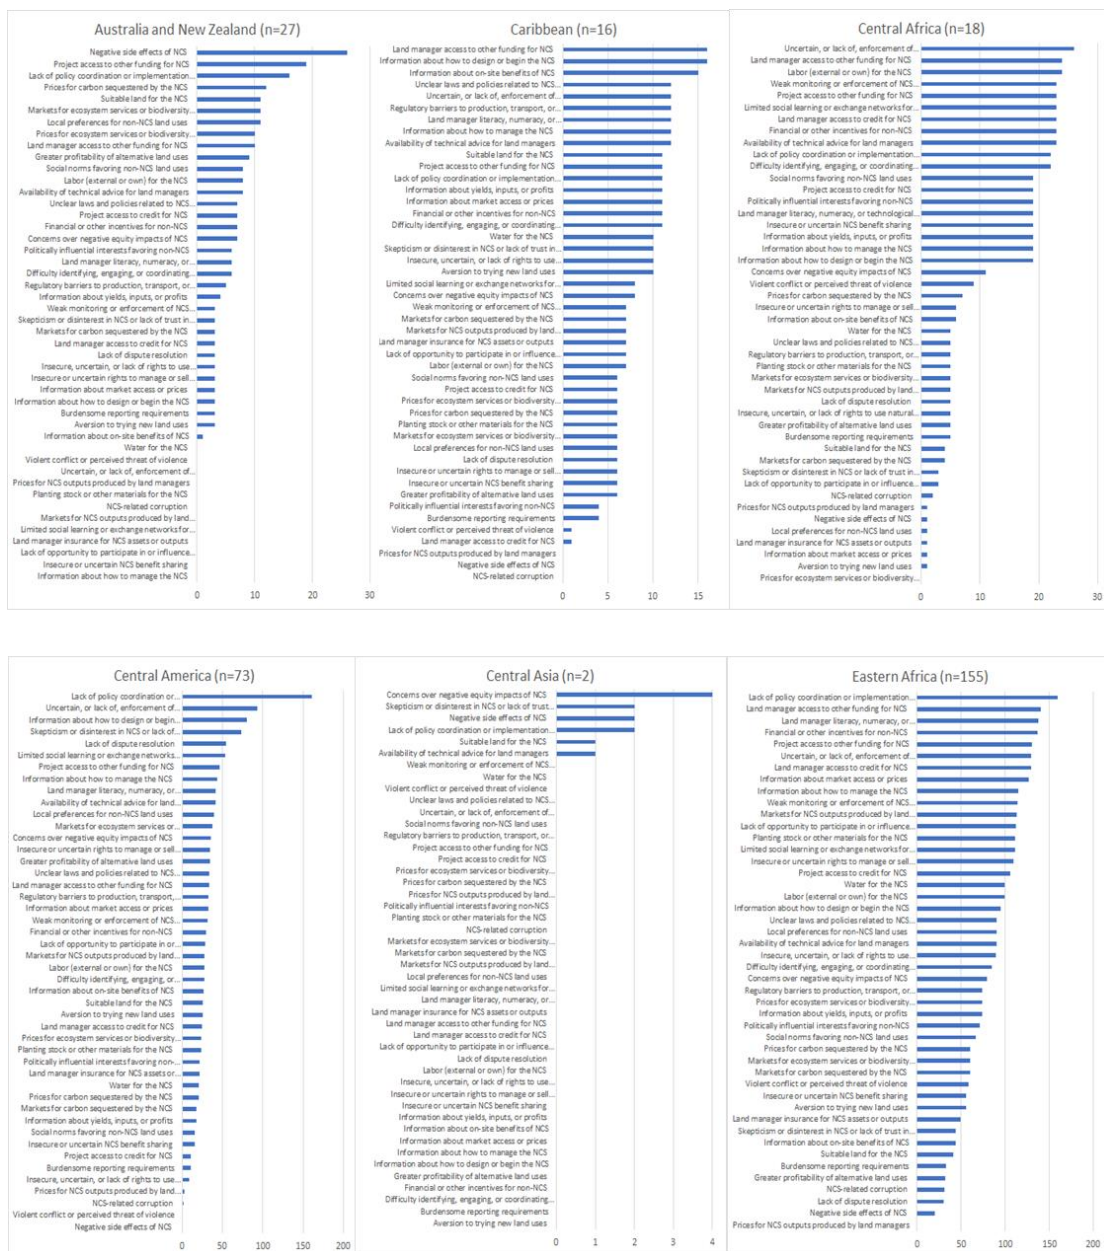

**Fig. S21. Frequency counts of individual constraints by UN subregion.** Note different x-axis scales.

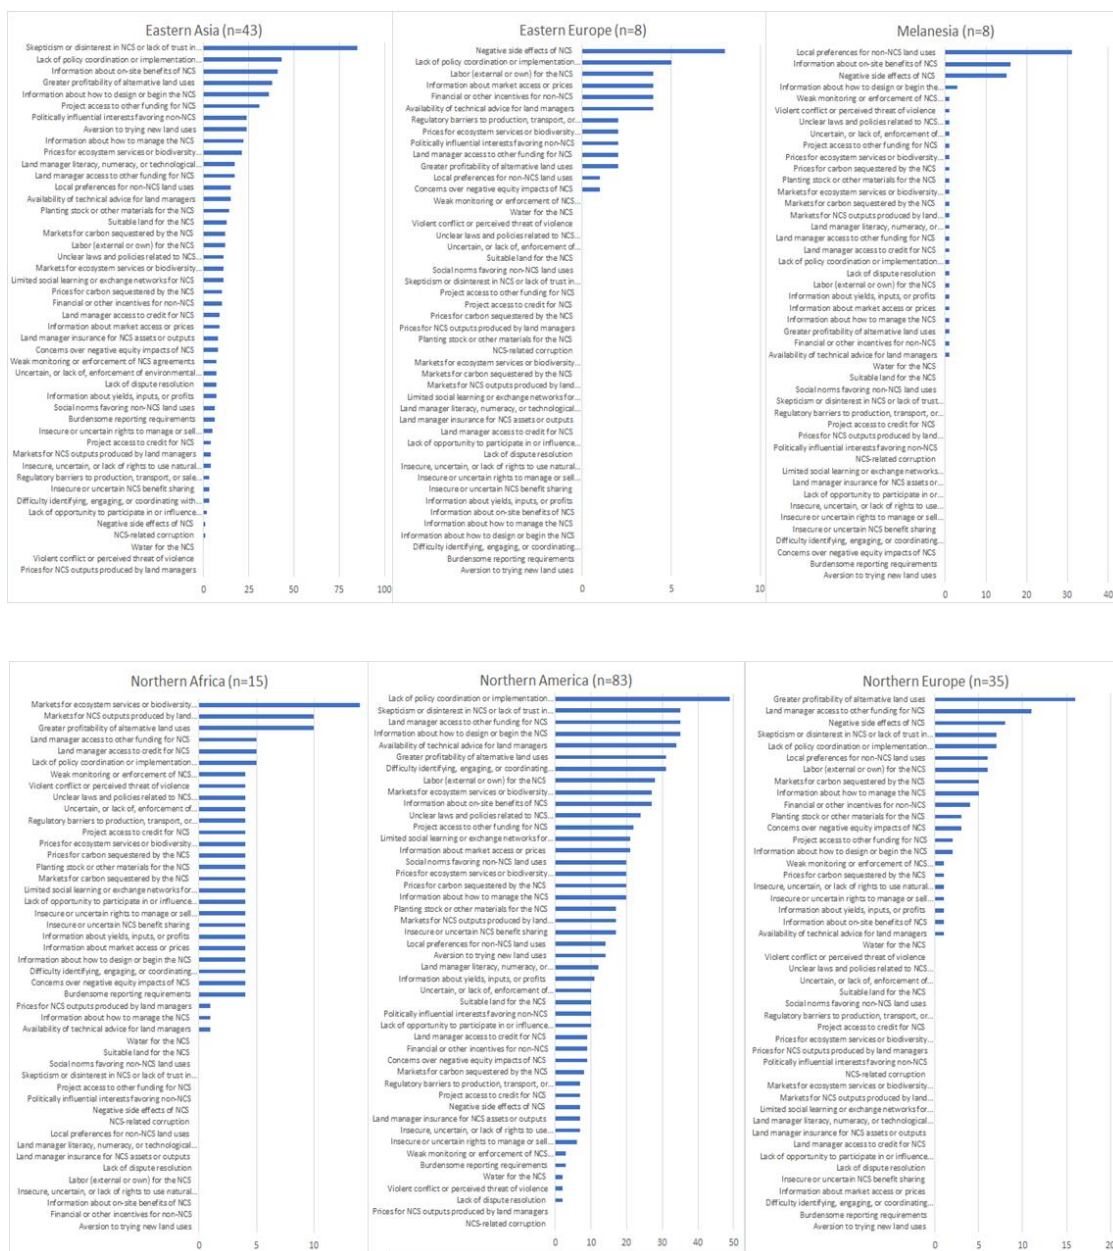

**Fig. S21 (continued). Frequency counts of individual constraints by UN subregion. Note different x-axis scales.**



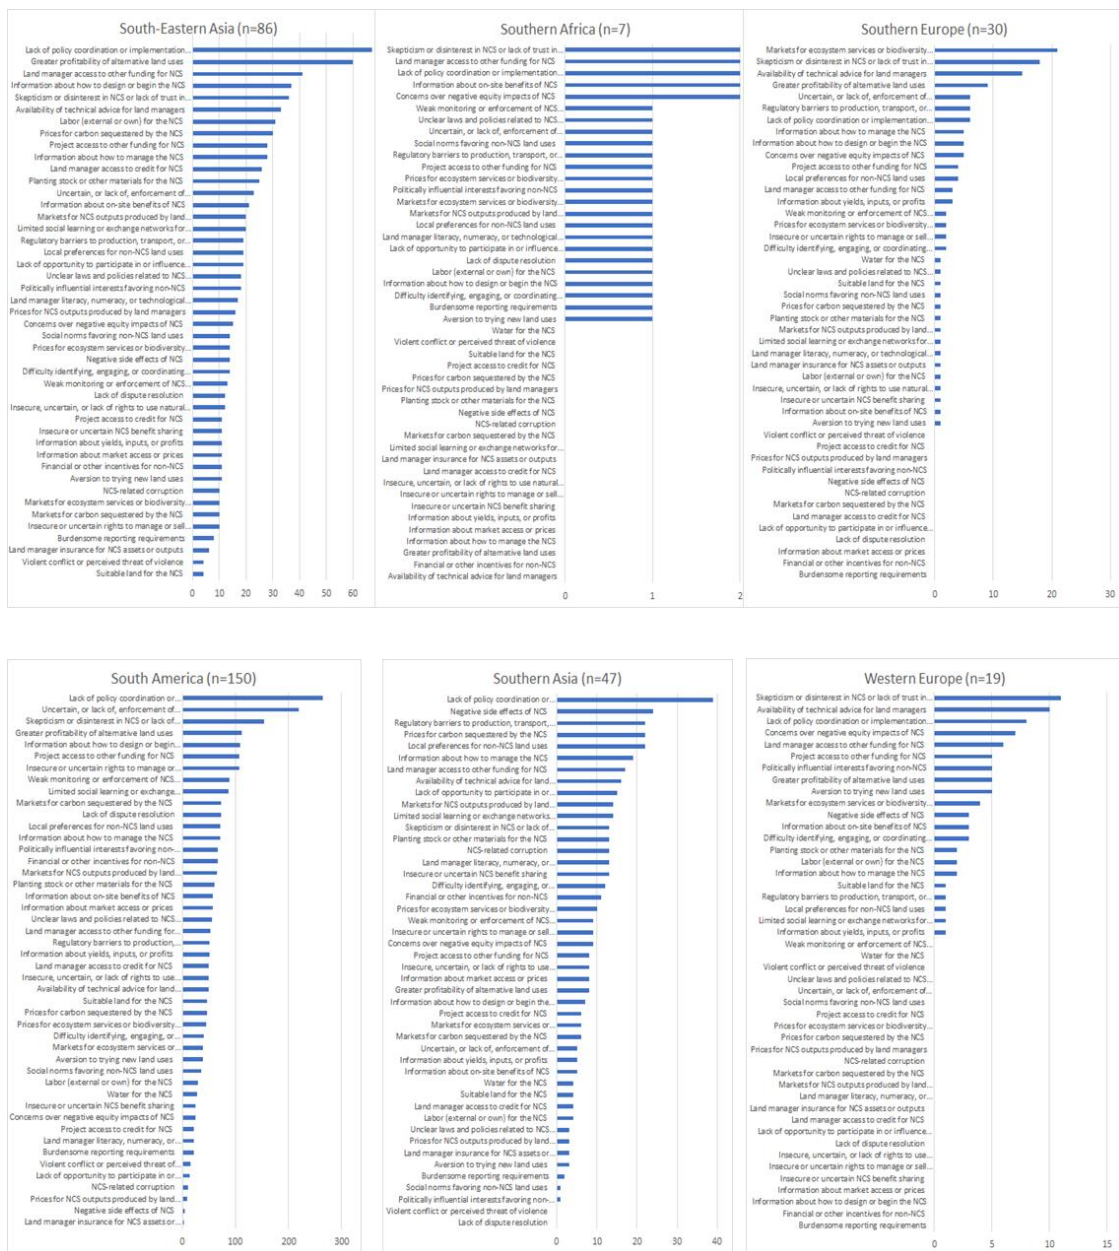

**Fig. S21 (continued). Frequency counts of individual constraints by UN subregion. Note different x-axis scales.**

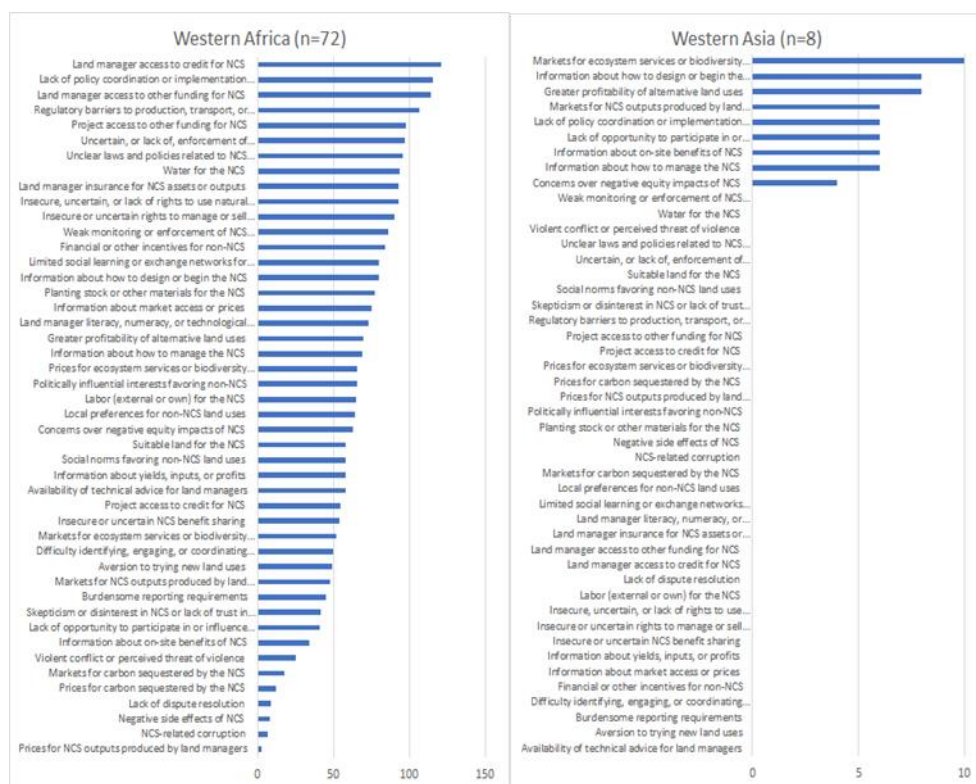

**Figure S21 (continued).** Frequency counts of individual constraints by UN subregion. Note different x-axis scales.

| Category        | Constraint name                                                    | Abbreviated name           | Description                                                                                                                                                                                                                                                                                                 |
|-----------------|--------------------------------------------------------------------|----------------------------|-------------------------------------------------------------------------------------------------------------------------------------------------------------------------------------------------------------------------------------------------------------------------------------------------------------|
| Material Inputs | Planting stock or other materials for the NCS                      | Planting stock/materials   | Limited or uncertain availability or quality, or high or uncertain cost of planting and related inputs                                                                                                                                                                                                      |
|                 | Labor (external or own) for the NCS                                | Available labor            | Limited or uncertain availability or quality, or high or uncertain cost of labor (for land managers or NCS project). Includes lack of sufficiently skilled labor.                                                                                                                                           |
|                 | Suitable land for the NCS                                          | Suitable land              | Limited or uncertain availability or quality, or high or uncertain cost of land. Includes instances where the NCS in question cannot be implemented due to biophysical constraints (e.g., due to size of farm machinery; steep slopes; lack of accessibility; water-logging; lack of soil depth or quality) |
|                 | Water for the NCS                                                  | Water availability         | Limited or uncertain availability or quality, or high or uncertain cost of water for establishment or maintenance of the NCS; includes insufficient precipitation, lack of water for irrigation, and lack of irrigation infrastructure                                                                      |
| Finance         | Land manager access to credit for NCS                              | Land manager credit        | Limited or uncertain availability, or too high or uncertain cost of credit for land managers for the NCS                                                                                                                                                                                                    |
|                 | Land manager access to other funding for NCS                       | Land manager other funding | Limited or uncertain availability, or too high or uncertain cost of other (non-credit) funding for land managers for the NCS                                                                                                                                                                                |
|                 | Land manager insurance for NCS assets or outputs                   | Land manager insurance     | Limited or uncertain availability, or too high or uncertain cost of NCS insurance for land managers                                                                                                                                                                                                         |
|                 | Project access to credit for NCS                                   | Project credit             | Limited or uncertain availability, or too high or uncertain cost of credit for entities that implement or support NCS; includes institutional entities such as communities and private entities that implement or facilitate NCS                                                                            |
|                 | Project access to other funding for NCS                            | Project other funding      | Limited or uncertain availability, or too high or uncertain cost of (non-credit) funding entities that implement or support NCS; includes institutional entities such as communities or government agencies, and private entities, that implement or facilitate NCS                                         |
|                 | Burdensome reporting requirements                                  | Burdensome reporting       | Limited or uncertain capacity to manage demanding donor/creditor relationships or reporting requirements, or high or uncertain cost of such reporting                                                                                                                                                       |
| Markets         | Markets for NCS outputs produced by land managers                  | NCS output markets         | Limited or uncertain availability of output (e.g., food or wood) markets, or high or uncertain costs associated with accessing output markets (due to lack of transport infrastructure or services, or high transaction costs in general)                                                                   |
|                 | Markets for carbon sequestered by the NCS                          | Carbon markets             | Limited or uncertain availability of carbon markets, or high or uncertain costs associated with accessing carbon markets (due to lack of needed intermediate service providers or high transaction costs in general)                                                                                        |
|                 | Markets for ecosystem services or biodiversity provided by the NCS | ES/biodiversity markets    | Limited or uncertain availability of relevant ecosystem services (e.g., water quality or flow regulation) or biodiversity markets, or high or uncertain costs associated with accessing such markets                                                                                                        |
|                 | Prices for NCS outputs produced by land managers                   | NCS output prices          | Low or uncertain prices of NCS outputs (e.g., food or wood)                                                                                                                                                                                                                                                 |
|                 | Prices for carbon sequestered by the NCS                           | Carbon prices              | Low or uncertain prices of carbon                                                                                                                                                                                                                                                                           |
|                 | Prices for ecosystem services or biodiversity provided by the NCS  | ES/biodiversity prices     | Low or uncertain prices of ecosystem services (e.g., water quality or flow regulation) or biodiversity                                                                                                                                                                                                      |
|                 | Greater profitability of alternative land uses                     | Lower profitability        | (Uncertainty about whether) Alternative land use generates higher net profits than NCS, or alternative land use has preferred cash flow structure (e.g., where delay in NCS income is considered to be too long)                                                                                            |

|                              |                                                                                                                                              |                                   |                                                                                                                                                                                                                                                                                                                                                      |
|------------------------------|----------------------------------------------------------------------------------------------------------------------------------------------|-----------------------------------|------------------------------------------------------------------------------------------------------------------------------------------------------------------------------------------------------------------------------------------------------------------------------------------------------------------------------------------------------|
| Negative side effects of NCS | Negative side effects (resource use, human health, property damage, wildlife conflict)                                                       | Negative NCS side effects         | Reductions in yields of existing crops, both subsistence or commercial (regardless of whether overall profitability of NCS is higher); negative impacts on human health; property damage; increased complexity or difficulty of land management; negative biodiversity impacts; conflict with neighbors; conflict with wildlife attracted by the NCS |
| Knowledge                    | Land manager literacy, numeracy, or technological capabilities                                                                               | Land manager capabilities         | Land manager reading, calculation, or technological abilities constrain NCS adoption (e.g., inability to read NCS educational or instructional materials; lack of ability to apply on-farm yield or profit calculators); or high or uncertain cost associated with improving land managers' literacy, numeracy or technological capabilities         |
|                              | Information about how to design or begin the NCS                                                                                             | NCS design info                   | Limited or uncertain availability of NCS design or installation information for land managers, NCS project staff or government employees; or limited or uncertain quality of this information, or high or uncertain cost associated with accessing this information                                                                                  |
|                              | Information about how to manage the NCS                                                                                                      | NCS management info               | Limited or uncertain availability of NCS operations or management information for land managers, NCS project staff or government employees; or limited or uncertain quality of this information, or high or uncertain cost associated with accessing this information                                                                                |
|                              | Availability of technical advice for land managers                                                                                           | Technical advice                  | Limited or uncertain availability or quality, or high or uncertain cost of NCS technical advice or extension services for land managers                                                                                                                                                                                                              |
|                              | Information about yields, inputs, or profits                                                                                                 | Input/yield/profit info           | Limited or uncertain availability or quality of information about NCS yields, inputs, or profits. Includes both absence of evidence, and lack of access to evidence.                                                                                                                                                                                 |
|                              | Information about market access or prices                                                                                                    | Market access/price info          | Limited or uncertain availability of information about NCS market access or prices (for NCS outputs, carbon, ecosystem services or biodiversity)                                                                                                                                                                                                     |
|                              | Information about on-site benefits of NCS                                                                                                    | On-site benefits info             | Limited availability or high uncertainty, or limited or uncertain quality of information about NCS performance (e.g., restoration success and associated climate mitigation; yield) and "co-benefits" (e.g., improved soil fertility or moisture, temperature mitigation for people or livestock, crop yield, or income diversification)             |
| Social and Behavioral        | Local preferences for non-NCS land uses                                                                                                      | Preference for non-NCS            | Preferences of land managers or local residents for non-NCS land uses. Preferences of govt officials or other influential parties are captured in separate constraint "Politically influential interests favoring non-NCS."                                                                                                                          |
|                              | Aversion to trying new land uses                                                                                                             | Aversion to change land use       | Generic dislike of any change in current land uses                                                                                                                                                                                                                                                                                                   |
|                              | Skepticism or disinterest in NCS or lack of trust in NCS promoters                                                                           | Skepticism/disinterest            | Land managers or local community or leaders are skeptical of or disinterested in NCS, or mistrust NCS promoters. Most cases involved disinterest rather than mistrust. Includes cases where NCS are hindered by concerns over lack of transparency of NCS implementation or planning                                                                 |
|                              | Social norms favoring non-NCS land uses                                                                                                      | Social norms                      | Cultural, religious, or other norms lead land managers to prefer non-NCS land uses (e.g., view of non-crop uses as 'unproductive' or otherwise less acceptable). Includes community pressure preventing land managers who are otherwise interested in NCS from adopting NCS.                                                                         |
|                              | Concerns over negative equity impacts of NCS                                                                                                 | Equity concerns                   | Land managers', or local community's or leaders' perception of actual or potential undesirable equity outcomes of NCS that inhibit NCS adoption or continuation                                                                                                                                                                                      |
|                              | Lack of opportunity to participate in or influence the implementation of NCS due to gender, race, ethnicity, or other dimensions of identity | Identity-based discrimination     | Identity-based discrimination that prevents certain racial, ethnic, religious, gender, or other groups from adopting NCS or from shaping the implementation of NCS                                                                                                                                                                                   |
|                              | Limited social learning or exchange networks for NCS                                                                                         | Social learning/exchange networks | Lack of, or lack of access to, formal or informal networks or programs that facilitate mutual learning or sharing of experiences about NCS among implementers, communities or government officials                                                                                                                                                   |

|                              |                                                                        |                                             |                                                                                                                                                                                                                                                                                                                                              |
|------------------------------|------------------------------------------------------------------------|---------------------------------------------|----------------------------------------------------------------------------------------------------------------------------------------------------------------------------------------------------------------------------------------------------------------------------------------------------------------------------------------------|
|                              | Difficulty identifying, engaging, or coordinating with relevant actors | Coordination among actors                   | Challenges in identifying, engaging, or coordinating with actors whose support or lack of opposition is required to make NCS implementation feasible in a given case, due to the large number, wide geographic dispersion, or conflicting attitudes of actors.                                                                               |
|                              | Lack of dispute resolution                                             | Dispute resolution                          | Absence of formal or informal mechanisms for resolving conflicts among individuals or groups that negatively impacts the establishment or maintenance of the NCS                                                                                                                                                                             |
| Rules and Laws               | Insecure or uncertain rights to manage or sell property                | Tenure rights-land                          | Lack of de jure, de facto, or perceived tenure rights – specifically, the right to manage or sell the land                                                                                                                                                                                                                                   |
|                              | Insecure, uncertain, or lack of rights to use natural resources        | Tenure rights-NCS assets                    | Lack of de jure, de facto, or perceived tenure rights – specifically, the right to use, harvest or sell specific components of the land (e.g., trees)                                                                                                                                                                                        |
|                              | Regulatory barriers to production, transport, or sale of NCS outputs   | Regulatory barriers                         | Permits, licenses, or other administrative conditions that must be met for legal adoption of NCS or for production, harvest, transport or sale of NCS outputs (e.g., transport permits for wood)                                                                                                                                             |
|                              | Insecure or uncertain NCS benefit sharing                              | Benefit sharing                             | Lack of, or doubts about, desirable distribution of benefits from NCS among relevant parties (e.g., land managers, other community member, funders, technical service providers, local authorities, or government representatives or agencies)                                                                                               |
|                              | NCS-related corruption                                                 | NCS-related corruption                      | Illegal rent-seeking by government officials or private actors that affects NCS management or effectiveness but that may not be particular to the NCS (e.g., corruption among government forest or transportation department officials)                                                                                                      |
|                              | Unclear laws and policies related to NCS outputs/markets               | Unclear laws/policies                       | Uncertainty about laws, policies or regulations that govern or may pertain to the adoption of NCS or the sale of NCS outputs (e.g., carbon, wood, food crops)                                                                                                                                                                                |
|                              | Financial or other incentives for non-NCS                              | Economic incentives for non-NCS             | Subsidies, reduced taxes, preferential access to credit or insurance, or other government incentives for non-NCS land uses that are not provided for NCS                                                                                                                                                                                     |
| Government and organizations | Lack of policy coordination or implementation capacity                 | Policy coordination implementation capacity | Uncoordinated, conflicting, or duplicative (and thus compliance burden-raising) policies (among economic sectors, different administrative units, different organizations, or combinations thereof) that negatively affect NCS adoption and deployment; or lack of capacity (technology, human resources) to implement NCS-relevant policies |
|                              | Uncertain, or lack of, enforcement of environmental laws               | Enforcement of environmental laws           | Complete or partial lack, or unpredictability, of enforcement of environmental laws that affect the NCS                                                                                                                                                                                                                                      |
|                              | Weak monitoring or enforcement of NCS agreements                       | Enforcement of NCS agreements               | Absent or insufficient compliance monitoring of formal or informal agreements underlying NCS implementation (e.g., in payments for environmental services [PES] programs for restoration, conservation, or changes in land management)                                                                                                       |
|                              | Violent conflict or perceived threat of violence                       | Violent conflict                            | Presence or fear of civil strife or military conflict, or perception of lack of government's ability to guarantee individuals' physical safety                                                                                                                                                                                               |
|                              | Politically influential interests favoring non-NCS                     | Influential interests favor non-NCS         | Individuals or small groups (private or government) with the ability to meaningfully affect policies favor non-NCS land uses. Includes political prioritization of competing goals and lack of urgency for NCS implementation.                                                                                                               |

**Table S1. Descriptions of NCS constraints.**



| This paper                                                                                                                                                                                                                                                                                                                                                                                                                                                                                                                  | IPCC <sup>2</sup>                                                                                                                                                                                                                                                                                                                                                                                        | Schulte et al. <sup>3</sup>                                                                                                                                                                                                                   | Roe et al. <sup>1</sup>                                                                                                                                                                                                                | Karki et al. <sup>4</sup>                                                                                                                                                                                                                                                                                                                                                                                                                                                                                                                                                                                                                                                             |
|-----------------------------------------------------------------------------------------------------------------------------------------------------------------------------------------------------------------------------------------------------------------------------------------------------------------------------------------------------------------------------------------------------------------------------------------------------------------------------------------------------------------------------|----------------------------------------------------------------------------------------------------------------------------------------------------------------------------------------------------------------------------------------------------------------------------------------------------------------------------------------------------------------------------------------------------------|-----------------------------------------------------------------------------------------------------------------------------------------------------------------------------------------------------------------------------------------------|----------------------------------------------------------------------------------------------------------------------------------------------------------------------------------------------------------------------------------------|---------------------------------------------------------------------------------------------------------------------------------------------------------------------------------------------------------------------------------------------------------------------------------------------------------------------------------------------------------------------------------------------------------------------------------------------------------------------------------------------------------------------------------------------------------------------------------------------------------------------------------------------------------------------------------------|
| <i>NCS implementation constraint categories and constraints</i>                                                                                                                                                                                                                                                                                                                                                                                                                                                             | <i>AFOLU barriers and opportunities</i>                                                                                                                                                                                                                                                                                                                                                                  | <i>Categories of NCS enabling factors</i>                                                                                                                                                                                                     | <i>NCS feasibility dimensions and indicators</i>                                                                                                                                                                                       | <i>Barriers and sub-barriers to LMT deployment</i>                                                                                                                                                                                                                                                                                                                                                                                                                                                                                                                                                                                                                                    |
| <b>Markets</b>                                                                                                                                                                                                                                                                                                                                                                                                                                                                                                              | <b>Socio-economic</b>                                                                                                                                                                                                                                                                                                                                                                                    | <b>Economic</b>                                                                                                                                                                                                                               | <b>Economic</b>                                                                                                                                                                                                                        | <b>Economic</b>                                                                                                                                                                                                                                                                                                                                                                                                                                                                                                                                                                                                                                                                       |
| <ul style="list-style-type: none"> <li>• Markets for NCS outputs produced by land managers (1)</li> <li>• Markets for carbon sequestered by the NCS (2)</li> <li>• Markets for ecosystem services or biodiversity provided by the NCS (3)</li> <li>• Prices for NCS outputs produced by land managers (4)</li> <li>• Prices for carbon sequestered by the NCS (5)</li> <li>• Prices for ecosystem services or biodiversity provided by the NCS (6)</li> <li>• Greater profitability of alternative land uses (7)</li> </ul> | <ul style="list-style-type: none"> <li>• Design and coverage of financing mechanisms (2,3,9)</li> <li>• Scale and accessibility of financing (4,5,6,8,9,11,12)</li> <li>• Risk aversion and uncertainty coupled with significant upfront investments and time lags (18,22,7)</li> <li>• Impacts on poverty and food security (36)</li> <li>• Cultural values and social acceptance (21,23,24)</li> </ul> | <ul style="list-style-type: none"> <li>• Delivery of benefits</li> <li>• Accessibility (1)</li> <li>• Labor availability (projects, programs, or gov. ministries) (37,43)</li> <li>• Market competitiveness (7)</li> </ul>                    | <ul style="list-style-type: none"> <li>• GDP per capita (PPP)</li> <li>• Forest rents (\$/ha)</li> <li>• Agricultural value added (\$/ha)</li> <li>• Ease of doing business</li> <li>• Ease of obtaining a bank loan (8,11)</li> </ul> | <ul style="list-style-type: none"> <li>• <i>Costs</i> (unable to afford specialized machinery; large initial investment, expensive to deploy at a scale where there is large potential) (9,11)</li> <li>• <i>Income</i> (potential for income decline due to trade-offs; transitional period with higher production costs and lower income; lack of incentives) (2,7)</li> <li>• <i>Value</i> (difficulty of monetizing non-market benefits/ES) (2,3,4)</li> </ul>                                                                                                                                                                                                                    |
| <b>Finance</b>                                                                                                                                                                                                                                                                                                                                                                                                                                                                                                              |                                                                                                                                                                                                                                                                                                                                                                                                          | <b>Financial</b>                                                                                                                                                                                                                              |                                                                                                                                                                                                                                        |                                                                                                                                                                                                                                                                                                                                                                                                                                                                                                                                                                                                                                                                                       |
| <ul style="list-style-type: none"> <li>• Land manager access to credit for NCS (8)</li> <li>• Land manager access to other funding for NCS (9)</li> <li>• Land manager insurance for NCS assets or outputs (10)</li> <li>• Project access to credit for NCS (11)</li> <li>• Project access to other funding for NCS (12)</li> <li>• Burdensome reporting requirements (13)</li> </ul>                                                                                                                                       |                                                                                                                                                                                                                                                                                                                                                                                                          | <ul style="list-style-type: none"> <li>• Performance-based finance (2,3)</li> <li>• Secure funding (9,12)</li> <li>• Donor finance (9,12)</li> <li>• Financial services (10)</li> </ul>                                                       |                                                                                                                                                                                                                                        |                                                                                                                                                                                                                                                                                                                                                                                                                                                                                                                                                                                                                                                                                       |
| <b>Knowledge</b>                                                                                                                                                                                                                                                                                                                                                                                                                                                                                                            | <b>Technological</b>                                                                                                                                                                                                                                                                                                                                                                                     | <b>Technical</b>                                                                                                                                                                                                                              | <b>Technological</b>                                                                                                                                                                                                                   | <b>Technological</b>                                                                                                                                                                                                                                                                                                                                                                                                                                                                                                                                                                                                                                                                  |
| <ul style="list-style-type: none"> <li>• Land manager literacy, numeracy, or technological capabilities (14)</li> <li>• Information about how to design or begin the NCS (15)</li> <li>• Information about how to manage the NCS (16)</li> <li>• Availability of technical advice for land managers (17)</li> <li>• Information about yields, inputs, or profits (18)</li> <li>• Information about market access or prices (19)</li> <li>• Information about on-site benefits of NCS (20)</li> </ul>                        | <ul style="list-style-type: none"> <li>• Monitoring, reporting, and verification needs (13,17)</li> </ul>                                                                                                                                                                                                                                                                                                | <ul style="list-style-type: none"> <li>• Technical assistance (17)</li> <li>• Monitoring, reporting, verification (13)</li> <li>• Land-use planning (15)</li> <li>• Compatible practices (15,16)</li> <li>• Research (15,16,18,20)</li> </ul> | <ul style="list-style-type: none"> <li>• Access to information and communications (15,16,18,19,20)</li> <li>• Market access and infrastructure (1,2)</li> <li>• Agricultural total factor productivity</li> </ul>                      | <ul style="list-style-type: none"> <li>• <i>Complexity</i> (difficult to adopt due to the complexity of LMTs for farmers/land managers; requiring high management skills) (14,15,16)</li> <li>• <i>Resources</i> (difficulty in access to specialised machinery; unavailability of transportation infrastructure; Lack of access to inputs; Limited/no access to credit; Limited extension facilities) (8,11,17,42)</li> <li>• <i>Development</i> (lack of development of efficient monitoring, reporting and verification; large uncertainties about the benefits of an LMT; limited scientific understanding of land suitability; technological readiness) (14,15,18,20)</li> </ul> |
| <b>Social - Behavioral</b>                                                                                                                                                                                                                                                                                                                                                                                                                                                                                                  |                                                                                                                                                                                                                                                                                                                                                                                                          | <b>Social</b>                                                                                                                                                                                                                                 | <b>Socio-cultural</b>                                                                                                                                                                                                                  | <b>Socio-cultural</b>                                                                                                                                                                                                                                                                                                                                                                                                                                                                                                                                                                                                                                                                 |

- Local preferences for non-NCS land uses (21)
- Aversion to trying new land uses (22)
- Skepticism or disinterest in NCS or lack of trust in NCS promoters (23)
- Social norms favoring non-NCS land uses (24)
- Concerns over negative equity impacts of NCS (25)
- Lack of opportunity to participate in or influence the implementation of NCS due to gender, race, ethnicity, or other dimensions of identity (26)
- Limited social learning or exchange networks for NCS (27)
- Difficulty identifying, engaging, or coordinating with relevant actors (28)
- Lack of dispute resolution (29)

- IPLC engagement (26)
- Acceptance (local) (21,23,24)
- Stakeholder consultation (28)
- Recognition of traditional values
- Free, prior, informed consent (FPIC)

- Personal rights (political rights, freedom of expression, freedom of religion, access to justice, property rights for women)
- Nutrition and basic medical care

- *Norms and values* (traditional beliefs, cultural affiliation to a traditional production system, cultural norm) (21,24)
- *Knowledge and perception* (lack of knowledge, limited awareness of value and benefits, low social acceptance, social pressure against LMTs, perceived threats from LMTs) (18,20,23,46)
- *Behavior* (difficulty in long-term decision for transition, lack of trust, habit of relying on conventional practice) (23,22)

#### Ethical

- *Conflicts* (risks of land grabbing; Issue of equitable benefit sharing; Issue of social conflicts) (25,29,30,33)
- *Trade-offs* (land availability and competition with other land uses; possible increase in food prices and compromise food security; Negative effect on the environment) (45,46)
- *Fairness* (limited access of women and minority groups to resources and land; no consideration of the rights of Indigenous People and local communities) (26)

| Rules and laws                                                                                                                                                                                                                                                                                                                                                                                                                                                                                                               | Institutional                                                                                                                                                                                         | Institutional                                                                                                                                                                                                                                                              | Institutional                                                                                                                                                                                                                                                                                                                             | Institutional                                                                                                                                                                                                                                                                                                                                                                                                                                                                                                                           |
|------------------------------------------------------------------------------------------------------------------------------------------------------------------------------------------------------------------------------------------------------------------------------------------------------------------------------------------------------------------------------------------------------------------------------------------------------------------------------------------------------------------------------|-------------------------------------------------------------------------------------------------------------------------------------------------------------------------------------------------------|----------------------------------------------------------------------------------------------------------------------------------------------------------------------------------------------------------------------------------------------------------------------------|-------------------------------------------------------------------------------------------------------------------------------------------------------------------------------------------------------------------------------------------------------------------------------------------------------------------------------------------|-----------------------------------------------------------------------------------------------------------------------------------------------------------------------------------------------------------------------------------------------------------------------------------------------------------------------------------------------------------------------------------------------------------------------------------------------------------------------------------------------------------------------------------------|
| <ul style="list-style-type: none"> <li>• Insecure or uncertain rights to manage or sell property (30)</li> <li>• Insecure, uncertain, or lack of rights to use natural resources (31)</li> <li>• Regulatory barriers to production, transport, or sale of NCS outputs (32)</li> <li>• Insecure or uncertain NCS benefit sharing (33)</li> <li>• NCS-related corruption (34)</li> <li>• Unclear laws and policies related to NCS outputs or markets (35)</li> <li>• Financial or other incentives for non-NCS (36)</li> </ul> | <ul style="list-style-type: none"> <li>• Transparent and accountable governance (34,38,39)</li> <li>• Clear land tenure and land-use rights (30,31)</li> <li>• Institutional capacity (37)</li> </ul> | <ul style="list-style-type: none"> <li>• Institutional frameworks (35)</li> <li>• Land/customary rights (30,31)</li> <li>• Realistic requirements (13)</li> <li>• Enforcement (38,39)</li> <li>• Regulatory support (32,35)</li> <li>• Clear carbon rights (33)</li> </ul> | <ul style="list-style-type: none"> <li>• Voice and accountability (26)</li> <li>• Political stability and absence of violence (40)</li> <li>• Government effectiveness (37,38,39)</li> <li>• Regulatory quality (35)</li> <li>• Rule of law (34,38)</li> <li>• Control of corruption (34)</li> <li>• Tenure insecurity (30,31)</li> </ul> | <ul style="list-style-type: none"> <li>• <i>Policy</i> (lack of policy support mechanism to set explicit incentives; lack of policy implementation; disinterest of policymakers) (37,41)</li> <li>• <i>Governance</i> (lack of cross-sectoral responsibility-sharing; top-down approach; coordination between stakeholders; lack of proper monitoring) (38,37)</li> <li>• <i>Regulation</i> (counter-productive public policies and legislation; lack of standards and protocols to measure carbon sequestration) (32,35,36)</li> </ul> |
| Government and organizations                                                                                                                                                                                                                                                                                                                                                                                                                                                                                                 |                                                                                                                                                                                                       |                                                                                                                                                                                                                                                                            | Political                                                                                                                                                                                                                                                                                                                                 |                                                                                                                                                                                                                                                                                                                                                                                                                                                                                                                                         |
| <ul style="list-style-type: none"> <li>• Lack of policy coordination or implementation capacity (37)</li> <li>• Uncertain, or lack of, enforcement of environmental laws (38)</li> <li>• Weak monitoring or enforcement of NCS agreements (39)</li> <li>• Violent conflict or perceived threat of violence (40)</li> </ul>                                                                                                                                                                                                   |                                                                                                                                                                                                       |                                                                                                                                                                                                                                                                            | <ul style="list-style-type: none"> <li>• Collaboration/coordination (37,28)</li> <li>• Acceptance (leadership) (41)</li> <li>• Political integrity (34)</li> <li>• Transparency</li> <li>• Accountability</li> </ul>                                                                                                                      |                                                                                                                                                                                                                                                                                                                                                                                                                                                                                                                                         |

- Politically influential interests favoring non-NCS (41)

| Material Inputs                                                                                                                                                                                                                        | Ecological                                                                                                                                                                                                                                                                       | Biophysical                                                                                                                                                            | Geophysical                                                                                                                                |
|----------------------------------------------------------------------------------------------------------------------------------------------------------------------------------------------------------------------------------------|----------------------------------------------------------------------------------------------------------------------------------------------------------------------------------------------------------------------------------------------------------------------------------|------------------------------------------------------------------------------------------------------------------------------------------------------------------------|--------------------------------------------------------------------------------------------------------------------------------------------|
| <ul style="list-style-type: none"> <li>• Planting stock or other materials for the NCS (42)</li> <li>• Labor (external or own) for the NCS (43)</li> <li>• Water for the NCS (44)</li> <li>• Suitable land for the NCS (45)</li> </ul> | <ul style="list-style-type: none"> <li>• Land and water availability (44,45)</li> <li>• Specific soil conditions, water availability, GHG emission potential, natural variability and resilience (18,20)</li> <li>• Adaptation benefits and biodiversity conservation</li> </ul> | <ul style="list-style-type: none"> <li>• Land conditions (45)</li> <li>• Climatic conditions</li> <li>• Species diversity</li> <li>• Carbon stock potential</li> </ul> | <ul style="list-style-type: none"> <li>• Total land-based technical mitigation potential / total land area (tCO<sub>2</sub>/ha)</li> </ul> |
| Negative side effects (46)                                                                                                                                                                                                             |                                                                                                                                                                                                                                                                                  |                                                                                                                                                                        | <div>Environmental-ecological</div> <ul style="list-style-type: none"> <li>• Environmental performance index (EPI)</li> </ul>              |

**Table S2. Comparison of constraint categories and constraints used in this paper with those used in other recent studies.**

Italicized numbers indicate potential or partial match with the respective constraint used in this paper. AFOLU – Agriculture, forestry and other land uses. ES – ecosystem services. GHG – greenhouse gas. LMT – land-based mitigation technology. NCS – natural climate solution.

| <i>Region</i>                      | Number of times<br>countries in region are<br>represented in papers | Number of<br>survey projects<br>in region | Number of<br>countries in region<br>covered in: |        | Number of times<br>countries in region are<br>studied in papers or<br>survey | Number of<br>countries in region<br>covered in literature<br>or survey | Share of all<br>countries in region<br>covered in papers<br>or survey |
|------------------------------------|---------------------------------------------------------------------|-------------------------------------------|-------------------------------------------------|--------|------------------------------------------------------------------------------|------------------------------------------------------------------------|-----------------------------------------------------------------------|
|                                    |                                                                     |                                           | Papers                                          | Survey |                                                                              |                                                                        |                                                                       |
| Africa                             | 116                                                                 | 63                                        | 41                                              | 22     | 179                                                                          | 44                                                                     | 81%                                                                   |
| Americas                           | 184                                                                 | 59                                        | 25                                              | 15     | 243                                                                          | 26                                                                     | 79%                                                                   |
| Asia                               | 154                                                                 | 25                                        | 37                                              | 5      | 179                                                                          | 37                                                                     | 77%                                                                   |
| Europe                             | 79                                                                  | 2                                         | 26                                              | 2      | 81                                                                           | 26                                                                     | 59%                                                                   |
| Australia-New<br>Zealand-Melanesia | 16                                                                  | 5                                         | 4                                               | 2      | 21                                                                           | 4                                                                      | 57%                                                                   |

**Table S3. Country coverage in literature review and survey.**

## Survey Questionnaire

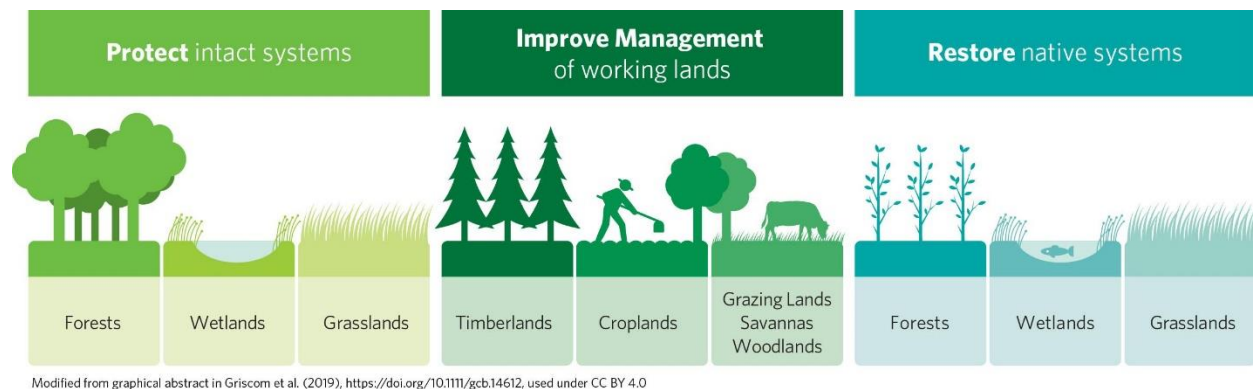

## Global survey of constraints, solutions, and enabling factors for scaling of projects that implement Natural Climate Solutions

*Note: Hold your cursor over text that looks like [this](#) for extra information, like definitions or explanations. [Note: the pop-up explanations are converted to footnotes in this document.]*

Welcome to the first global survey of projects that implement Natural Climate Solutions. Natural Climate Solutions (NCS) are conservation, restoration, or improved management activities in terrestrial or aquatic systems that reduce greenhouse gas emissions or sequester carbon dioxide. They include common practices such as integration of trees in pasture or croplands; soil conservation or restoration measures (for example, cover crops, reduced tillage, or improved fallow); improved crop fertilizer or water management; improved fire management; improved livestock density, rotation, and manure management; and restoration or avoided conversion of forests, grasslands or wetlands.

This survey seeks to learn from any project that implements NCS activities, whether exclusively or as part of a broader portfolio of activities, and regardless of whether the project seeks to achieve climate change mitigation or adaptation, livelihood or human well-being improvements, biodiversity conservation, or some other objective.

### ***Why we need this survey***

The biophysical potential for NCS to make large contributions to climate change mitigation is well-documented. Yet, [projects](#)<sup>1</sup> that implement NCS often face a variety of constraints, and these constraints remain poorly understood. Without understanding the constraints NCS projects face, it is uncertain where and how much NCS potential is limited by implementation challenges;

---

<sup>1</sup> An NCS “project” here is defined as 1) the direct implementation of one or several NCS by an entity or group of entities on a discrete site or sites (for example, a peatland rewetting and agroforestry project carried out by a local government with the assistance of a research entity); or 2) the provision, by others, of services that support the direct implementation of specific NCS practices across diverse sites by a discrete set of land owners or managers (for example, the provision of technical extension services that support the adoption of smallholder agroforestry in a particular geography).

project planning is more uncertain; and it is more difficult to consider where and how NCS may be scaled.

To address this information gap, we (the signatories below) have launched a multi-institutional, global-scale effort to engage projects that deploy NCS, with the goal of collecting information on the constraints they face when implementing NCS, identifying possible solutions to those constraints, and better understanding key factors that inhibit the scaling of NCS projects. **This survey is a central part of that effort.**

We are contacting you because of your deep knowledge of projects that implement NCS activities.

Your participation in this survey is critical to help better understand what is needed to enable faster progress on mitigating climate change and achieving the many other desirable outcomes that NCS deliver.

This survey has three parts and should take approximately 45 minutes to complete.

***What this survey will do for your project(s) and for efforts to limit climate change and further other important outcomes that NCS can deliver***

We believe that participation in this survey will allow you to critically reflect on project implementation, through a systematic and comprehensive self-assessment of the constraints your project may face, and of the potential solutions for addressing those constraints.

In addition, the insights gained from this survey will be used to:

- Help projects globally communicate the key constraints they are facing, via a mapping portal;
- Inform private and public decision-makers about these constraints and about key actions needed to mitigate these constraints in a geographically explicit manner;
- Inform private and public decision-makers about key enabling conditions for scaling of NCS that currently are not met in specific geographies;
- Inform other (current or future) NCS projects about potential constraints and key actions to mitigate these constraints;
- Identify important solutions for projects with similar constraints

In the first quarter of 2023, we will share the initial results of this survey, including country and regional analyses, with you and all other survey participants. The results also will be published in an open-access journal article and on the new NCS Global Opportunity Mapper web portal to be launched in late 2023, with all project identifying information removed to ensure confidentiality.

All of the information you provide will be kept confidential. Only summary information with aggregated responses will be reported publicly. Your participation in this survey is voluntary and you may withdraw at any time. There is minimal risk of your individual responses being revealed due to the measures we are taking to secure your information. The Lead Investigators for this

project are Timm Kroeger and J.T. Erbaugh at The Nature Conservancy. You may reach them at [tkroeger@tnc.org](mailto:tkroeger@tnc.org) and [james.erbaugh@tnc.org](mailto:james.erbaugh@tnc.org), respectively.

Thank you again for your support of this important effort! We greatly appreciate your expertise and contribution.

**Please complete this survey by 31 December, 2023.**

Sincerely,

*The Nature Conservancy  
African Forest Forum  
Catholic Relief Services  
Center for International Forestry Research / World Agroforestry Center  
Conservation International  
EcoAgriculture Partners  
Eden Reforestation Projects  
Foundation for Ecological Security  
Heifer International  
International Centre for Integrated Mountain Development  
One Acre Fund  
Regreening Africa  
Wildlife Conservation Society  
World Resources Institute  
World Wildlife Fund*

---

Page Break

After reading the description of this research, are you interested in participating in this survey?

- ☐ I am willing to participate
- ☐ I am not willing to participate

---

Page Break

Thank you for agreeing to participate.

The questions that follow ask for information about you, your organizational affiliation, and the [project](#)<sup>2</sup> for which you are entering constraints.

If you think there are additional people involved in your project with specific expertise on particular constraints your project faces, or with different perspectives on constraints, we would encourage each of them to complete the survey or, ideally, you and them to jointly complete a single survey.

You may share the survey with others who share expertise on the constraints your project faces by sending them this link:

[https://tncva.qualtrics.com/jfe/form/SV\\_dbbsSQm8iSMPQtU](https://tncva.qualtrics.com/jfe/form/SV_dbbsSQm8iSMPQtU)

---

Name/s of respondent/s (First, Last):

*Note: This question is optional. If more than one person complete this survey together, please separate all names with semicolons.*

---

<sup>2</sup> An NCS “project” here is defined as 1) the direct implementation of one or several NCS by an entity or group of entities on a discrete site or sites (for example, a peatland rewetting and agroforestry project carried out by a local government with the assistance of a research entity); or 2) the provision, by others, of services that support the direct implementation of specific NCS practices across diverse sites by a discrete set of land owners or managers (for example, the provision of technical extension services that support the adoption of smallholder agroforestry in a particular geography).



Gender identity of respondent/s

*Note: Please enter the number of respondents taking this survey that identify as the following genders*

☐ Women \_\_\_\_\_

☐ Men \_\_\_\_\_

☐ Non-binary \_\_\_\_\_

---

Nationality of respondent/s

*Note: For groups of respondents with different nationalities, please separate each nationality with a semicolon.*

\_\_\_\_\_

---

Organizational affiliation of respondent/s

*Note: If individuals from more than one organization complete this survey, or if an individual has multiple organizational affiliations, please separate each organization with a semicolon.*

\_\_\_\_\_

---

Position title of respondent/s

*Note: If more than one person complete this survey together, please separate each position with a semicolon.*

\_\_\_\_\_

---

Page Break

Name of the [project](#)<sup>3</sup> for which you are entering constraints

*Note 1: If you are working on multiple separate NCS projects, please complete this survey for one specific project. You may complete separate surveys for additional projects. If the activities carried out remain the same or similar but are carried out by successive projects, it is sufficient to complete one survey for all these projects. In this case, in the relevant fields below, please enter the different project names, the start date of the initial project, and, if applicable, the end date of the last project.*

*Note 2: Projects can face very different challenges when they implement activities in different administrative units (for example, countries, states or provinces). If your project operates across national boundaries, we strongly suggest completing a separate survey for each national context. In addition, if your project faces very different challenges in different areas within a single country, it might be useful to fill out separate surveys for these areas. However, we leave the geographic precision with which you want to report constraints for your project to your best judgment.*

---

The year this project began (or will begin) to implement climate change mitigating activities

*Note: If the start year is uncertain, please enter "uncertain."*

---

The year this project ended or will end

*Note: If the project does not have an end date, please enter "none."*

---

What is the current total area of your project (in hectares, square kilometers, acres, or square miles)? If your project has ended, please enter the total area from the last year of its operation. If you provide services that support the direct implementation of NCS activities by others, enter the approximate total size of the area on which your services support NCS implementation.

---

<sup>3</sup> An NCS “project” here is defined as 1) the direct implementation of one or several NCS by an entity or group of entities on a discrete site or sites (for example, a peatland rewetting and agroforestry project carried out by a local government with the assistance of a research entity); or 2) the provision, by others, of services that support the direct implementation of specific NCS practices across diverse sites by a discrete set of land owners or managers (for example, the provision of technical extension services that support the adoption of smallholder agroforestry in a particular geography).

*Note: If you do not measure your project in area, please leave this question blank*

|              | Area Measurement | Unit                  |                       |                       |                       |
|--------------|------------------|-----------------------|-----------------------|-----------------------|-----------------------|
|              |                  | hectares              | square kilometers     | acres                 | square miles          |
| Project Size |                  | <input type="radio"/> | <input type="radio"/> | <input type="radio"/> | <input type="radio"/> |

If you do not measure your project in terms of area, but there is another measurement for your project, please enter the measurement and units.

|              | Size Measurement | Unit |
|--------------|------------------|------|
|              |                  |      |
| Project Size |                  |      |

Page Break

Is this project pursuing carbon credits?

- ☐ Yes
- ☐ Not currently, but interest in exploring the possibility in the future
- ☐ No
- ☐ Unsure

Which of the following carbon markets or credit registries does the project target?

- ☐ CAR (Climate Action Reserve)
- ☐ VERRA (Verified Carbon Standard)
- ☐ CDM (Clean Development Mechanism)
- ☐ ACR (American Carbon Registry)
- ☐ ICR (International Carbon Registry)
- ☐ EU ETS (European Union Emissions Trading Scheme)
- ☐ Plan Vivo
- ☐ Other (please specify) \_\_\_\_\_
- ☐ Unsure

---

Page Break

Country in which the [project](#)<sup>4</sup> is located

*Note: If the project takes place in multiple countries, please list each country, separating them*

---

<sup>4</sup> An NCS “project” here is defined as 1) the direct implementation of one or several NCS by an entity or group of entities on a discrete site or sites (for example, a peatland rewetting and agroforestry project carried out by a local government with the assistance of a research entity); or 2) the provision, by others, of services that support the direct implementation of specific NCS practices across diverse sites by a discrete set of land owners or managers (for example, the provision of technical extension services that support the adoption of smallholder agroforestry in a particular geography).

with a comma (",").

---

If you entered more than one country as the project location, please enter the country for which you are completing this survey.

---

Indicate where this project is implemented (by moving the marker)

*Note: If the project takes place in multiple locations, please use the marker to identify the primary implementation location.*

[Map widget]

---

Are there any other details about your project location that are important to know?

*Note: Additional details you might include are the names of different states/provinces in which the project operates. Please only list the locations (states/provinces) in the country for which you are completing this survey.*

---

---

---

---

---

Who owns the lands or waters on which this project operates (select all that apply):

- ☐ Government
  - ☐ Private individuals
  - ☐ Private companies
  - ☐ Non-governmental organizations (NGOs)
  - ☐ Indigenous communities<sup>5</sup>
  - ☐ Other local communities
  - ☐ Other (please specify)
- 

---

<sup>5</sup> Indigenous Peoples are also referred to as Native Peoples, Aboriginal Peoples, First Peoples, or by locally-specific terms.

Who manages (*that is, tends, harvests or otherwise uses natural resources from*) the lands or waters on which this project operates (select all that apply):

- ☐ Government
  - ☐ Private individuals
  - ☐ Private companies
  - ☐ Non-governmental organizations (NGOs)
  - ☐ Indigenous communities <sup>6</sup>
  - ☐ Other local communities
  - ☐ Other (please specify)
- 

---

Page Break

This NCS project implements or directly supports the implementation of (*select all that apply*):

*Note: If you or your organization do not directly implement NCS on your own lands but rather provide services that directly support the implementation of NCS by others (for example, provision of technical extension services or of supplies or inputs for NCS), please select from the list below the NCS whose implementation your services support.*

---

<sup>6</sup> Indigenous Peoples are also referred to as Native Peoples, Aboriginal Peoples, First Peoples, or by locally-specific terms.

- ☐ Agroforestry <sup>7</sup>
  - ☐ Regenerative agriculture (other than Agroforestry) <sup>8</sup>
  - ☐ Avoided forest conversion <sup>9</sup>
  - ☐ Restoration of natural forests <sup>10</sup>
  - ☐ Reforestation with commercial plantations <sup>11</sup>
  - ☐ Climate-smart forestry <sup>12</sup>
  - ☐ Avoided coastal wetland conversion <sup>13</sup>
  - ☐ Coastal wetland restoration <sup>14</sup>
  - ☐ Avoided grassland conversion <sup>15</sup>
  - ☐ Grassland restoration <sup>16</sup>
  - ☐ Avoided peatland conversion <sup>17</sup>
  - ☐ Peatland restoration <sup>18</sup>
  - ☐ Savanna management <sup>19</sup>
  - ☐ Other (please specify):
- 

<sup>7</sup> Integration of trees in crop or pasturelands, including tree intercropping, orchards, woodlots, and short-rotation energy tree crops.

<sup>8</sup> Activities that often are implemented to achieve soil or water conservation, or improved soil health or water quality: Biochar, changes in the type, timing, quantity, or targeting of fertilizer application, cover cropping, improved fallow or interplanting of legumes, establishment of riparian buffers, improved rice water management, reduced tillage, improved livestock density or rotation, legumes in pastures, grazing land fire management, or improved manure management.

<sup>9</sup> Avoided forest loss from commodity agriculture, shifting cultivation, or urban or infrastructure expansion.

<sup>10</sup> Active planting, assisted regrowth (for example: fencing, fertilization, or suppression of competition from non-tree or invasive species), or passive/natural recovery.



Activities related to agroforestry performed through this project:

- ☐ Trees in croplands (alley cropping, windbreaks) or trees in pasturelands
- ☐ Establishing orchards (fruit or nut trees)
- ☐ Establishing woodlots (treed area managed as a source of fuel, posts and other wood products)
- ☐ Establishing short-rotation tree crops for biomass energy
- ☐ Other (please specify) \_\_\_\_\_

Activities related to avoided forest conversion performed through this project:

- ☐ Avoided conversion from agriculture
- ☐ Avoided conversion from shifting cultivation
- ☐ Avoided conversion from urban or infrastructure expansion
- ☐ Other (please specify) \_\_\_\_\_

---

<sup>11</sup> Active planting of single species (monoculture) or multiple species (polyculture) plantations.

<sup>12</sup> Extended rotation lengths, reduced impact logging for climate mitigation (RIL-C), forestry set-asides (ceased logging), or enhanced growth.

<sup>13</sup> Saltmarsh, mangrove, or seagrass conservation.

<sup>14</sup> Re-establishment of saltmarshes, mangroves, or seagrass.

<sup>15</sup> Avoided loss of grasslands from commodity agriculture, shifting conservation, or urban or infrastructure expansion.

<sup>16</sup> Natural regeneration of grasslands or assisted planting of grasslands.

<sup>17</sup> Avoided peatland drainage or avoided peatland burning.

<sup>18</sup> Canal blocking or other forms of peatland re-wetting.

<sup>19</sup> Improved fire management and reduced wood harvest (including in prairies, woodlands, woody grasslands, shrublands, steppes, pampas, cerrado, tundra and other terrestrial habitats with tree cover of <25%).

NatReforSubPath Activities related to restoration of natural forests performed through this project:

- ☐ Active planting
  - ☐ Assisted regrowth (for example: fencing, fertilization, or suppression of competition from non-tree or invasive species)
  - ☐ Passive/natural recovery
  - ☐ Other (please specify)
- 

Activities related to reforestation with commercial plantations through this project:

- ☐ Assisted planting of single tree species (monocultures)
  - ☐ Assisted planting of multiple tree species (polycultures)
  - ☐ Other (please specify)
- 

Activities related to climate-smart forestry performed through this project:

- ☐ Extended rotations
  - ☐ Reduced impact logging for climate mitigation (RIL-C)
  - ☐ Forestry set-asides (stop logging)
  - ☐ Enhanced growth
  - ☐ Other (please specify)
-

Activities related to avoided coastal wetland conversion performed through this project:

- ☐ Avoided Saltmarsh conversion
  - ☐ Avoided Mangrove conversion
  - ☐ Avoided Seagrass conversion
  - ☐ Other (please specify)
- 

Activities related to coastal wetland restoration performed through this project:

- ☐ Saltmarsh restoration
  - ☐ Mangrove restoration
  - ☐ Seagrass restoration
  - ☐ Other (please specify)
- 

Activities related to avoided grassland conversion performed through this project:

- ☐ Avoided conversion from commodity agriculture
  - ☐ Avoided conversion from shifting conservation
  - ☐ Avoided conversion from urban or infrastructure expansion
  - ☐ Other (please specify)
-

Activities related to grassland restoration performed through this project:

- ☐ Natural regeneration
  - ☐ Assisted planting
  - ☐ Other (please specify)
- 

Activities related to avoided peatland conversion performed through this project:

- ☐ Avoided peatland drainage
  - ☐ Avoided peatland burning
  - ☐ Other (please specify)
- 

Activities related to peatland restoration performed through this project:

- ☐ Canal blocking
  - ☐ Other forms of peatland re-wetting
  - ☐ Other (please specify)
- 

Activities related to regenerative agriculture (other than agroforestry) performed through this project:

*(Note: these are activities that often are implemented to achieve soil or water conservation, improved soil health, or improved water quality.)*

- ☐ Application of biochar
  - ☐ Changes in fertilizer application (type, rate, timing, location)
  - ☐ Cover cropping
  - ☐ Improved fallow or intercropping with legumes
  - ☐ Establishment of riparian buffers
  - ☐ Improved rice water management
  - ☐ Reduced tillage
  - ☐ Improved livestock density or rotation
  - ☐ Planting legumes in pasture
  - ☐ Improved manure management
  - ☐ Improved fire management (grasslands, croplands)
- 

Activities related to [savanna](#) management performed through this project:

- ☐ Fire management (for example: early dry season prescribed burning)
  - ☐ Reduced wood harvest
  - ☐ Other (please specify)
- 

End of Block: Introduction

---

## Start of Block: Module 1 Constraints Selection

The first part of this survey asks about constraints to implementing NCS projects. 'Constraints' refer to factors that limit the implementation of NCS or that make NCS implementation challenging.

When answering questions about constraints, please think about the barriers your project team (including any partners that help implement the project) faces that impact your ability to meet project objectives. These include barriers that make it challenging for individual land managers to implement NCS.

We suggest first reading through the full list of constraints, and then selecting all constraints that make it challenging for your team to achieve the full project objectives.

If you don't see a constraint that is important to the implementation of your project, you may add that constraint in the "Other Constraint" text fields at the bottom of the constraints list.

Please complete this survey specifically for the project you identified above.

Page Break

---

Please indicate if your project faces constraints related to the following:

|                                                                                                                                                  | Yes (Applies to my project) | No (Does not apply to my project) | Unsure                |
|--------------------------------------------------------------------------------------------------------------------------------------------------|-----------------------------|-----------------------------------|-----------------------|
| Planting stock or other materials for the NCS                                                                                                    | <input type="radio"/>       | <input type="radio"/>             | <input type="radio"/> |
| Labor (external or own) for the NCS                                                                                                              | <input type="radio"/>       | <input type="radio"/>             | <input type="radio"/> |
| Suitable land for the NCS                                                                                                                        | <input type="radio"/>       | <input type="radio"/>             | <input type="radio"/> |
| Water for the NCS                                                                                                                                | <input type="radio"/>       | <input type="radio"/>             | <input type="radio"/> |
| <a href="#">Land manager/operator</a> <sup>20</sup> access to credit for NCS                                                                     | <input type="radio"/>       | <input type="radio"/>             | <input type="radio"/> |
| <b><u>Land manager/operator</u></b> access to other funding for NCS                                                                              | <input type="radio"/>       | <input type="radio"/>             | <input type="radio"/> |
| <b><u>Land manager/operator</u></b> insurance for NCS assets or outputs                                                                          | <input type="radio"/>       | <input type="radio"/>             | <input type="radio"/> |
| Project access to credit for NCS                                                                                                                 | <input type="radio"/>       | <input type="radio"/>             | <input type="radio"/> |
| Project access to other funding for NCS                                                                                                          | <input type="radio"/>       | <input type="radio"/>             | <input type="radio"/> |
| Donor/Creditor relationships or reporting                                                                                                        | <input type="radio"/>       | <input type="radio"/>             | <input type="radio"/> |
| Markets for NCS outputs (for example, food or wood) produced by land managers/operators                                                          | <input type="radio"/>       | <input type="radio"/>             | <input type="radio"/> |
| Markets for carbon sequestered by the NCS                                                                                                        | <input type="radio"/>       | <input type="radio"/>             | <input type="radio"/> |
| <a href="#">Markets</a> <sup>21</sup> for ecosystem services (for example, water quality or flow regulation) or biodiversity provided by the NCS | <input type="radio"/>       | <input type="radio"/>             | <input type="radio"/> |
| Prices for NCS outputs (for example, food or wood) produced by land managers/operators                                                           | <input type="radio"/>       | <input type="radio"/>             | <input type="radio"/> |



---

<sup>20</sup> Any actors or organizations that manage land, including private individuals, community groups, government organizations, or corporations.

<sup>21</sup> Including any type of payment for ecosystem services

|                                                                                                                                        |                       |                       |                       |
|----------------------------------------------------------------------------------------------------------------------------------------|-----------------------|-----------------------|-----------------------|
| Prices for carbon sequestered by the NCS                                                                                               | <input type="radio"/> | <input type="radio"/> | <input type="radio"/> |
| Prices for ecosystem services (for example, water quality or flow regulation) or biodiversity provided by the NCS                      | <input type="radio"/> | <input type="radio"/> | <input type="radio"/> |
| Greater profitability of alternative land uses (please specify alternative use)                                                        | <input type="radio"/> | <input type="radio"/> | <input type="radio"/> |
| Land manager/operator literacy, numeracy, or technological capabilities                                                                | <input type="radio"/> | <input type="radio"/> | <input type="radio"/> |
| Information about how to design or begin the NCS                                                                                       | <input type="radio"/> | <input type="radio"/> | <input type="radio"/> |
| Information about how to manage the NCS (for example, maintenance activities, monitoring activities, or other inputs and their timing) | <input type="radio"/> | <input type="radio"/> | <input type="radio"/> |
| Availability of technical advice for land managers/operators (for example, extension services)                                         | <input type="radio"/> | <input type="radio"/> | <input type="radio"/> |
| Information about yields, inputs, or profits                                                                                           | <input type="radio"/> | <input type="radio"/> | <input type="radio"/> |
| Information about market access or prices                                                                                              | <input type="radio"/> | <input type="radio"/> | <input type="radio"/> |
| Information about on-site benefits of NCS (for example, soil fertility, shade for livestock, or income diversification)                | <input type="radio"/> | <input type="radio"/> | <input type="radio"/> |
| Preferences for non-NCS land uses                                                                                                      | <input type="radio"/> | <input type="radio"/> | <input type="radio"/> |
| Aversion to trying new land uses                                                                                                       | <input type="radio"/> | <input type="radio"/> | <input type="radio"/> |
| Skepticism/disinterest toward NCS or lack of trust in NCS promoters                                                                    | <input type="radio"/> | <input type="radio"/> | <input type="radio"/> |
| Social norms favoring non-NCS land uses                                                                                                | <input type="radio"/> | <input type="radio"/> | <input type="radio"/> |

|                                                                                                                                              |                       |                       |                       |
|----------------------------------------------------------------------------------------------------------------------------------------------|-----------------------|-----------------------|-----------------------|
| Concerns over negative equity impacts of NCS                                                                                                 | <input type="radio"/> | <input type="radio"/> | <input type="radio"/> |
| Lack of opportunity to participate in or influence the implementation of NCS due to gender, race, ethnicity, or other dimensions of identity | <input type="radio"/> | <input type="radio"/> | <input type="radio"/> |
| Limited social learning or exchange networks for NCS                                                                                         | <input type="radio"/> | <input type="radio"/> | <input type="radio"/> |
| Difficulty identifying, engaging, or coordinating with relevant actors                                                                       | <input type="radio"/> | <input type="radio"/> | <input type="radio"/> |
| Insecure or uncertain rights to manage or sell property                                                                                      | <input type="radio"/> | <input type="radio"/> | <input type="radio"/> |
| Insecure, uncertain, or lack of rights to use natural resources                                                                              | <input type="radio"/> | <input type="radio"/> | <input type="radio"/> |
| Regulatory barriers to production, transport, or sale of NCS outputs (for example, need for permits or licensing)                            | <input type="radio"/> | <input type="radio"/> | <input type="radio"/> |
| Insecure or uncertain NCS benefit sharing                                                                                                    | <input type="radio"/> | <input type="radio"/> | <input type="radio"/> |
| NCS-related corruption                                                                                                                       | <input type="radio"/> | <input type="radio"/> | <input type="radio"/> |
| Unclear laws and policies related to NCS outputs/markets                                                                                     | <input type="radio"/> | <input type="radio"/> | <input type="radio"/> |
| Lack of policy coordination (for example, between sectors or between different administrative units)                                         | <input type="radio"/> | <input type="radio"/> | <input type="radio"/> |
| Uncertain enforcement of environmental laws                                                                                                  | <input type="radio"/> | <input type="radio"/> | <input type="radio"/> |
| Weak monitoring and enforcement of NCS agreements                                                                                            | <input type="radio"/> | <input type="radio"/> | <input type="radio"/> |
| Violent conflict or perceived threat of violence                                                                                             | <input type="radio"/> | <input type="radio"/> | <input type="radio"/> |

|                                                                                                                  |                       |                       |                       |
|------------------------------------------------------------------------------------------------------------------|-----------------------|-----------------------|-----------------------|
| Lack of dispute resolution mechanisms                                                                            | <input type="radio"/> | <input type="radio"/> | <input type="radio"/> |
| Financial or other incentives for non-NCS (for example, subsidies, reduced taxes, access to credit or insurance) | <input type="radio"/> | <input type="radio"/> | <input type="radio"/> |
| Politically influential interests favoring non-NCS                                                               | <input type="radio"/> | <input type="radio"/> | <input type="radio"/> |
| Other Constraint 1 (please specify)                                                                              | <input type="radio"/> | <input type="radio"/> | <input type="radio"/> |
| Other Constraint 2 (please specify)                                                                              | <input type="radio"/> | <input type="radio"/> | <input type="radio"/> |
| Other Constraint 3 (please specify)                                                                              | <input type="radio"/> | <input type="radio"/> | <input type="radio"/> |

---

Page Break

Please rank up to five of the most important constraints you have identified, with one (1) as the most important constraint, two (2) as the second-most important constraint, and so on. Five (5) will be the fifth-most important constraint.

For all constraints listed below that are not ranked one through five, please leave blank.

End of Block: Module 1 Constraints Selection

Start of Block: Module 2: Additional information on top constraints

Next, we ask more specific questions about the constraints you identified as most important.

---

For constraints related to "planting stock and other materials," indicate if the following constrain the implementation of your project.

|                                                                                | Yes (Applies to my project) | No (Does not apply to my project) | Unsure                |
|--------------------------------------------------------------------------------|-----------------------------|-----------------------------------|-----------------------|
| <b>Limited or uncertain availability</b> of planting stock and other materials | <input type="radio"/>       | <input type="radio"/>             | <input type="radio"/> |
| <b>Limited or uncertain quality</b> of planting stock and other materials      | <input type="radio"/>       | <input type="radio"/>             | <input type="radio"/> |
| <b>High or uncertain costs</b> of planting stock or other materials            | <input type="radio"/>       | <input type="radio"/>             | <input type="radio"/> |

Provide any additional information that might help us understand constraints related to "planting stock and other materials" for this project.

---

For constraints related to "labor (external or own) for NCS pathway," indicate if the following constrain the implementation of your project.

|                                                                     | Yes (Applies to my project) | No (Does not apply to my project) | Unsure                |
|---------------------------------------------------------------------|-----------------------------|-----------------------------------|-----------------------|
| <b>Limited or uncertain availability</b> of labor (external or own) | <input type="radio"/>       | <input type="radio"/>             | <input type="radio"/> |
| <b>Limited or uncertain quality</b> of labor (external or own)      | <input type="radio"/>       | <input type="radio"/>             | <input type="radio"/> |
| <b>High or uncertain costs</b> of labor (external or own)           | <input type="radio"/>       | <input type="radio"/>             | <input type="radio"/> |

Provide any additional information that might help us understand constraints related to "labor (external or own) for NCS pathway" for this project.

---

Page Break

For constraints related to "suitable land for NCS pathway," indicate if the following constrain the implementation of your project.

|                                                  | Yes (Applies to my project) | No (Does not apply to my project) | Unsure                |
|--------------------------------------------------|-----------------------------|-----------------------------------|-----------------------|
| <b>Limited or uncertain availability</b> of land | <input type="radio"/>       | <input type="radio"/>             | <input type="radio"/> |
| <b>Limited or uncertain quality</b> of land      | <input type="radio"/>       | <input type="radio"/>             | <input type="radio"/> |
| <b>High or uncertain cost</b> of land            | <input type="radio"/>       | <input type="radio"/>             | <input type="radio"/> |

Provide any additional information that might help us understand constraints related to "suitable land for NCS pathway" for this project.

---

Page Break

For constraints related to "water for NCS pathway," indicate if the following constrain the implementation of your project.

|                                                   | Yes (Applies to my project) | No (Does not apply to my project) | Unsure                |
|---------------------------------------------------|-----------------------------|-----------------------------------|-----------------------|
| <b>Limited or uncertain availability</b> of water | <input type="radio"/>       | <input type="radio"/>             | <input type="radio"/> |
| <b>Limited or uncertain quality</b> of water      | <input type="radio"/>       | <input type="radio"/>             | <input type="radio"/> |
| <b>High or uncertain cost</b> of water            | <input type="radio"/>       | <input type="radio"/>             | <input type="radio"/> |

Provide any additional information that might help us understand constraints related to "water for the NCS pathway" for this project.

Page Break

For constraints related to "land manager/operator access to credit for NCS pathway," indicate if the following constrain the implementation of your project.

|                                                                       | Yes (Applies to my project) | No (Does not apply to my project) | Unsure                |
|-----------------------------------------------------------------------|-----------------------------|-----------------------------------|-----------------------|
| <b>Limited or uncertain availability</b> of credit for land operators | <input type="radio"/>       | <input type="radio"/>             | <input type="radio"/> |
| <b>High or uncertain cost</b> of credit for land operators            | <input type="radio"/>       | <input type="radio"/>             | <input type="radio"/> |

Provide any additional information that might help us understand constraints related to "land manager/operator access to credit for NCS pathway" for this project.

Page Break

For constraints related to "land manager/operator access to other funding for NCS," indicate if the following constrain the implementation of your project.

|                                                                              | Yes (Applies to my project) | No (Does not apply to my project) | Unsure                |
|------------------------------------------------------------------------------|-----------------------------|-----------------------------------|-----------------------|
| <b>Limited or uncertain availability</b> of other funding for land operators | <input type="radio"/>       | <input type="radio"/>             | <input type="radio"/> |
| <b>High or uncertain cost</b> of other funding for land operators            | <input type="radio"/>       | <input type="radio"/>             | <input type="radio"/> |

Provide any additional information that might help us understand constraints related to "land manager/operator access to other funding for NCS" for this project.

---

Page Break

For constraints related to "land manager/operator insurance for NCS assets or outputs," indicate if the following constrain the implementation of your project.

|                                                                          | Yes (Applies to my project) | No (Does not apply to my project) | Unsure                |
|--------------------------------------------------------------------------|-----------------------------|-----------------------------------|-----------------------|
| <b>Limited or uncertain availability</b> of insurance for land operators | <input type="radio"/>       | <input type="radio"/>             | <input type="radio"/> |
| <b>High or uncertain cost</b> of insurance for land operators            | <input type="radio"/>       | <input type="radio"/>             | <input type="radio"/> |

Provide any additional information that might help us understand constraints related to "land manager/operator insurance for NCS assets or outputs" for this project.

---

Page Break

For constraints related to "project access to credit for NCS," indicate if the following constrain the implementation of your project.



|                                                                    | Yes (Applies to my project) | No (Does not apply to my project) | Unsure                |
|--------------------------------------------------------------------|-----------------------------|-----------------------------------|-----------------------|
| <b>Limited or uncertain availability</b> of credit for the project | <input type="radio"/>       | <input type="radio"/>             | <input type="radio"/> |
| <b>High or uncertain cost</b> of credit for the project            | <input type="radio"/>       | <input type="radio"/>             | <input type="radio"/> |

Provide any additional information that might help us understand constraints related to "project access to credit for NCS" for this project.

---

Page Break

For constraints related to "project access to other funding for NCS," indicate if the following constrain the implementation of your project.

|                                                                           | Yes (Applies to my project) | No (Does not apply to my project) | Unsure                |
|---------------------------------------------------------------------------|-----------------------------|-----------------------------------|-----------------------|
| <b>Limited or uncertain availability</b> of other funding for the project | <input type="radio"/>       | <input type="radio"/>             | <input type="radio"/> |
| <b>High or uncertain cost</b> of other funding for the project            | <input type="radio"/>       | <input type="radio"/>             | <input type="radio"/> |

Provide any additional information that might help us understand constraints related to "project access to other funding for NCS" for this project.

---

Page Break

For constraints related to "donor/creditor relationships or reporting," indicate if the following constrain the implementation of your project.

|                                                                                          | Yes (Applies to my project) | No (Does not apply to my project) | Unsure                |
|------------------------------------------------------------------------------------------|-----------------------------|-----------------------------------|-----------------------|
| <b>Limited or uncertain capacity</b> to manage donor/creditor relationships or reporting | <input type="radio"/>       | <input type="radio"/>             | <input type="radio"/> |
| <b>High or uncertain cost</b> to manage donor/creditor relationships or reporting        | <input type="radio"/>       | <input type="radio"/>             | <input type="radio"/> |

Provide any additional information that might help us understand constraints related to "donor/creditor relationships or reporting" for this project.

---

Page Break

For constraints related to "markets for NCS outputs (for example, food or wood) produced by the land manager/operator," indicate if the following constrain the implementation of your project.

|                                                                                                                                                                                        | Yes (Applies to my project) | No (Does not apply to my project) | Unsure                |
|----------------------------------------------------------------------------------------------------------------------------------------------------------------------------------------|-----------------------------|-----------------------------------|-----------------------|
| <b>Limited or uncertain availability</b> of markets for outputs (for example, food or wood)                                                                                            | <input type="radio"/>       | <input type="radio"/>             | <input type="radio"/> |
| <b>High or uncertain costs</b> associated with accessing markets for project outputs (for example, this may be due to transport costs, market rules, or difficulty identifying buyers) | <input type="radio"/>       | <input type="radio"/>             | <input type="radio"/> |

Provide any additional information that might help us understand constraints related to "markets for NCS outputs (for example, food or wood) produced by the land operator" for this project.

---

Page Break

For constraints related to "markets for carbon sequestered by the NCS," indicate if the following constrain the implementation of your project.

|                                                                                                                                                                               | Yes (Applies to my project) | No (Does not apply to my project) | Unsure                |
|-------------------------------------------------------------------------------------------------------------------------------------------------------------------------------|-----------------------------|-----------------------------------|-----------------------|
| <b>Limited or uncertain availability</b> of markets for carbon                                                                                                                | <input type="radio"/>       | <input type="radio"/>             | <input type="radio"/> |
| <b>High or uncertain costs</b> associated with accessing markets for carbon (for example, this may be due to transport costs, market rules, or difficulty identifying buyers) | <input type="radio"/>       | <input type="radio"/>             | <input type="radio"/> |

Provide any additional information that might help us understand constraints related to "markets for carbon sequestered by the NCS" for this project.

---

Page Break

For constraints related to "markets for ecosystem services (for example, water quality or flow regulation) or biodiversity provided by the NCS," indicate if the following constrain the implementation of your project.

|                                                                                                                                                                                                                                                           | Yes (Applies to my project) | No (Does not apply to my project) | Unsure                |
|-----------------------------------------------------------------------------------------------------------------------------------------------------------------------------------------------------------------------------------------------------------|-----------------------------|-----------------------------------|-----------------------|
| <b>Limited or uncertain availability</b> of markets for ecosystem services (for example, water quality or flow regulation) or biodiversity                                                                                                                | <input type="radio"/>       | <input type="radio"/>             | <input type="radio"/> |
| <b>High or uncertain costs</b> associated with accessing markets for ecosystem services (for example, water quality or flow regulation) or biodiversity (for example, this may be due to transport costs, market rules, or difficulty identifying buyers) | <input type="radio"/>       | <input type="radio"/>             | <input type="radio"/> |

Provide any additional information that might help us understand constraints related to "markets for ecosystem services (for example, water quality or flow regulation) or biodiversity provided by the NCS" for this project.

---

Page Break

For constraints related to "prices for NCS outputs (for example, food or wood) produced by the land managers/operator," indicate if the following constrains the implementation of your project.

|                                                                        | Yes (Applies to my project) | No (Does not apply to my project) | Unsure                |
|------------------------------------------------------------------------|-----------------------------|-----------------------------------|-----------------------|
| <b>Low or uncertain prices</b> for outputs (for example, food or wood) | <input type="radio"/>       | <input type="radio"/>             | <input type="radio"/> |

Provide any additional information that might help us understand constraints related to "prices for NCS outputs (for example, food or wood) produced by the land managers/operator" for this project.

---

Page Break

For constraints related to "prices for carbon sequestered by the NCS," indicate if the following constrains the implementation of your project.

|                                           | Yes (Applies to my project) | No (Does not apply to my project) | Unsure                |
|-------------------------------------------|-----------------------------|-----------------------------------|-----------------------|
| <b>Low or uncertain prices</b> for carbon | <input type="radio"/>       | <input type="radio"/>             | <input type="radio"/> |

Provide any additional information that might help us understand constraints related to "prices for carbon sequestered by the NCS" for this project.

---

Page Break

For constraints related to "prices for ecosystem services (for example, water quality or flow regulation) or biodiversity provided by the NCS," indicate if the following constrains the implementation of your project.

|                                                                                                                       | Yes (Applies to my project) | No (Does not apply to my project) | Unsure                |
|-----------------------------------------------------------------------------------------------------------------------|-----------------------------|-----------------------------------|-----------------------|
| <b>Low or uncertain prices</b> for ecosystem services (for example, water quality or flow regulation) or biodiversity | <input type="radio"/>       | <input type="radio"/>             | <input type="radio"/> |

Provide any additional information that might help us understand constraints related to "prices for ecosystem services (for example, water quality or flow regulation) or biodiversity provided by the NCS" for this project.

---

Page Break

For constraints related to "greater profitability of alternative land uses: *[respondent's earlier text entry]*" indicate if the following constrain the implementation of your project.

|                                                                                     | Yes (Applies to my project) | No (Does not apply to my project) | Unsure                |
|-------------------------------------------------------------------------------------|-----------------------------|-----------------------------------|-----------------------|
| <b>Alternative land use(s) are more profitable</b> than NCS                         | <input type="radio"/>       | <input type="radio"/>             | <input type="radio"/> |
| <b>Uncertainty about whether alternative land uses are more profitable</b> than NCS | <input type="radio"/>       | <input type="radio"/>             | <input type="radio"/> |

Provide any additional information that might help us understand constraints related to "greater profitability of alternative land uses: *[respondent's earlier text entry]*" for this project.

---

Page Break

For constraints related to "land manager/operator literacy, numeracy or technological capabilities," indicate if the following constrain the implementation of your project.

|                                                                                                                                       | Yes (Applies to my project) | No (Does not apply to my project) | Unsure                |
|---------------------------------------------------------------------------------------------------------------------------------------|-----------------------------|-----------------------------------|-----------------------|
| <b>Limited or uncertain availability</b> of land managers/operators with sufficient literacy, numeracy, or technological capabilities | <input type="radio"/>       | <input type="radio"/>             | <input type="radio"/> |
| <b>High or uncertain cost</b> associated with improving land operators' literacy, numeracy, or technological capabilities             | <input type="radio"/>       | <input type="radio"/>             | <input type="radio"/> |

Provide any additional information that might help us understand constraints related to "land manager/operator literacy, numeracy, or technological capabilities" for this project.

---

---

Page Break

Who primarily experiences constraints related to "information about how to design or begin the NCS?"

- ☐ Land managers/operators primarily face the constraint
- ☐ **Project staff/managers** primarily face the constraint
- ☐ **Both land owners/managers and project staff/managers** face the constraint

For constraints related to "information about how to design or begin the NCS," indicate if the following constrain the implementation of your project.

|                                                                                 | Yes (Applies to my project) | No (Does not apply to my project) | Unsure                |
|---------------------------------------------------------------------------------|-----------------------------|-----------------------------------|-----------------------|
| <b>Limited or uncertain availability</b> of design and installation knowledge   | <input type="radio"/>       | <input type="radio"/>             | <input type="radio"/> |
| <b>Limited or uncertain quality</b> of design and installation knowledge        | <input type="radio"/>       | <input type="radio"/>             | <input type="radio"/> |
| <b>High or uncertain cost</b> associated with design and installation knowledge | <input type="radio"/>       | <input type="radio"/>             | <input type="radio"/> |

Provide any additional information that might help us understand constraints related to "information about how to design or begin the NCS" for this project.

---

---

Page Break

Who primarily experiences constraints related to "information about how to manage the NCS (for example, maintenance activities, monitoring activities, or other inputs and their timing)?"

- ☐ Land managers/operators primarily face the constraint
- ☐ **Project staff/managers** primarily face the constraint
- ☐ **Both land owners/managers and project staff/managers** face the constraint

---

For constraints related to "information about how to manage the NCS (for example, maintenance activities, monitoring activities, or other inputs and their timing)," indicate if the following constrain the implementation of your project.

|                                                                                   | Yes (Applies to my project) | No (Does not apply to my project) | Unsure                |
|-----------------------------------------------------------------------------------|-----------------------------|-----------------------------------|-----------------------|
| <b>Limited or uncertain availability</b> of operations and management knowledge   | <input type="radio"/>       | <input type="radio"/>             | <input type="radio"/> |
| <b>Limited or uncertain quality</b> of operations and management knowledge        | <input type="radio"/>       | <input type="radio"/>             | <input type="radio"/> |
| <b>High or uncertain cost</b> associated with operations and management knowledge | <input type="radio"/>       | <input type="radio"/>             | <input type="radio"/> |

---

Provide any additional information that might help us understand constraints related to "information about how to manage the NCS (for example, maintenance activities, monitoring activities, or other inputs and their timing)" for this project.

---

For constraints related to "availability of technical advice for land managers/operators (for example, extension services)," indicate if the following constrain the implementation of your project.



|                                                                                    | Yes (Applies to my project) | No (Does not apply to my project) | Unsure                |
|------------------------------------------------------------------------------------|-----------------------------|-----------------------------------|-----------------------|
| <b>Limited or uncertain availability</b> of technical advice or extension services | <input type="radio"/>       | <input type="radio"/>             | <input type="radio"/> |
| <b>Limited or uncertainty quality</b> of technical advice or extension services    | <input type="radio"/>       | <input type="radio"/>             | <input type="radio"/> |
| <b>High or uncertain cost</b> of technical advice or extension services            | <input type="radio"/>       | <input type="radio"/>             | <input type="radio"/> |

Provide any additional information that might help us understand constraints related to "availability of technical advice for land managers/operators (for example, extension services)" for this project.

---

Page Break

Who primarily experiences constraints related to "information about yields, inputs, and profits?"

- ☐ Land managers/operators primarily face the constraint
- ☐ **Project staff/managers** primarily face the constraint
- ☐ **Both land owners/managers and project staff/managers** face the constraint

For constraints related to "information about yields, inputs, and profits" for the outputs the project produces, indicate if the following constrain the implementation of your project.

|                                                                                        | Yes (Applies to my project) | No (Does not apply to my project) | Unsure                |
|----------------------------------------------------------------------------------------|-----------------------------|-----------------------------------|-----------------------|
| <b>Limited or uncertain availability</b> of information on yields, inputs, and profits | <input type="radio"/>       | <input type="radio"/>             | <input type="radio"/> |
| <b>Limited or uncertain quality</b> of information on yields, inputs, and profits      | <input type="radio"/>       | <input type="radio"/>             | <input type="radio"/> |

Provide any additional information that might help us understand constraints related to "information about yields, inputs, and profits" for this project.

---

---

Page Break

Who primarily experiences constraints related to "information about market access or prices?"

- ☐ Land managers/operators primarily face the constraint
- ☐ **Project staff/managers** primarily face the constraint
- ☐ **Both land owners/managers and project staff/managers** face the constraint

---

For constraints related to "information about market access or prices," indicate if the following constrain the implementation of your project.

|                                                                                    | Yes (Applies to my project) | No (Does not apply to my project) | Unsure                |
|------------------------------------------------------------------------------------|-----------------------------|-----------------------------------|-----------------------|
| <b>Limited or uncertain availability</b> of Information on market access or prices | <input type="radio"/>       | <input type="radio"/>             | <input type="radio"/> |
| <b>Limited or uncertain quality</b> of Information on market access or prices      | <input type="radio"/>       | <input type="radio"/>             | <input type="radio"/> |

---

Provide any additional information that might help us understand constraints related to "information about market access or prices" for this project.

|                                                                                    | Yes (Applies to my project) | No (Does not apply to my project) | Unsure                |
|------------------------------------------------------------------------------------|-----------------------------|-----------------------------------|-----------------------|
| <b>Limited or uncertain availability</b> of Information on market access or prices | <input type="radio"/>       | <input type="radio"/>             | <input type="radio"/> |
| <b>Limited or uncertain quality</b> of Information on market access or prices      | <input type="radio"/>       | <input type="radio"/>             | <input type="radio"/> |

Who primarily experiences constraints related to "information about on-site co-benefits of NCS (for example, soil fertility, fodder or shade for livestock)?"

- ☐ **Land owners/managers** primarily face the constraint
- ☐ **Project staff/managers** primarily face the constraint
- ☐ **Both land owners/managers and project staff/managers** face the constraint

For constraints related to "information about on-site co-benefits of NCS (for example, soil fertility, shade for livestock, or income diversification)," indicate if the following constrain the implementation of your project.

|                                                                              | Yes (Applies to my project) | No (Does not apply to my project) | Unsure                |
|------------------------------------------------------------------------------|-----------------------------|-----------------------------------|-----------------------|
| <b>Limited availability</b> of Information about on-site co-benefits         | <input type="radio"/>       | <input type="radio"/>             | <input type="radio"/> |
| <b>Limited or uncertain quality</b> of Information about on-site co-benefits | <input type="radio"/>       | <input type="radio"/>             | <input type="radio"/> |

Provide any additional information that might help us understand constraints related to "information about on-site co-benefits of NCS (for example, soil fertility, shade for livestock, or income diversification)" for this project.

---

Page Break

For constraints related to "preferences for non-NCS land uses," indicate if the following constrain the implementation of your project.

|                                                                                       | Yes (Applies to my project) | No (Does not apply to my project) | Unsure                |
|---------------------------------------------------------------------------------------|-----------------------------|-----------------------------------|-----------------------|
| <b>Land manager/operator</b> preferences for non-NCS land uses                        | <input type="radio"/>       | <input type="radio"/>             | <input type="radio"/> |
| <b>Local community or government</b> preferences for non-NCS land uses                | <input type="radio"/>       | <input type="radio"/>             | <input type="radio"/> |
| <b>District/County or State/Province government</b> preferences for non-NCS land uses | <input type="radio"/>       | <input type="radio"/>             | <input type="radio"/> |
| <b>National ministry or department</b> preferences for non-NCS land uses              | <input type="radio"/>       | <input type="radio"/>             | <input type="radio"/> |

Provide any additional information that might help us understand constraints related to "preferences for non-NCS land uses" for this project.

---

Page Break

For constraints related to "aversion to trying new land uses," indicate if the following constrain the implementation of your project.

|                                                                                      | Yes (Applies to my project) | No (Does not apply to my project) | Unsure                |
|--------------------------------------------------------------------------------------|-----------------------------|-----------------------------------|-----------------------|
| <b>Land manager/operator</b> aversion to trying new land uses                        | <input type="radio"/>       | <input type="radio"/>             | <input type="radio"/> |
| <b>Local community or government</b> aversion to trying new land uses                | <input type="radio"/>       | <input type="radio"/>             | <input type="radio"/> |
| <b>District/County or State/Province government</b> aversion to trying new land uses | <input type="radio"/>       | <input type="radio"/>             | <input type="radio"/> |
| <b>National ministry or department</b> aversion to trying new land uses              | <input type="radio"/>       | <input type="radio"/>             | <input type="radio"/> |

Provide any additional information that might help us understand constraints related to "aversion to trying new land uses" for this project.

---

Page Break

---

For constraints related to "skepticism toward NCS or a lack of trust in NCS promoters," indicate if the following constrain the implementation of your project.

|                                                                                                                 | Yes (Applies to my project) | No (Does not apply to my project) | Unsure                |
|-----------------------------------------------------------------------------------------------------------------|-----------------------------|-----------------------------------|-----------------------|
| <b>Land manager/operator</b> skepticism toward NCS or lack of trust toward NCS promoters                        | <input type="radio"/>       | <input type="radio"/>             | <input type="radio"/> |
| <b>Local community or government</b> skepticism toward NCS or lack of trust toward NCS promoters                | <input type="radio"/>       | <input type="radio"/>             | <input type="radio"/> |
| <b>District/County or State/Province government</b> skepticism toward NCS or lack of trust toward NCS promoters | <input type="radio"/>       | <input type="radio"/>             | <input type="radio"/> |
| <b>National ministry or department</b> skepticism toward NCS or lack of trust toward NCS promoters              | <input type="radio"/>       | <input type="radio"/>             | <input type="radio"/> |

Provide any additional information that might help us understand constraints related to "skepticism toward NCS or a lack of trust in NCS promoters" for this project.

---

Page Break

For constraints related to "social norms favoring non-NCS land uses," indicate if the following constrain the implementation of your project

|                                                                                        | Yes (Applies to my project) | No (Does not apply to my project) | Unsure                |
|----------------------------------------------------------------------------------------|-----------------------------|-----------------------------------|-----------------------|
| <b>Land manager/operator</b> favor non-NCS due to social norms                         | <input type="radio"/>       | <input type="radio"/>             | <input type="radio"/> |
| <b>Local community or government</b> favor non-NCS due to social norms                 | <input type="radio"/>       | <input type="radio"/>             | <input type="radio"/> |
| <b>District/County or State/Province government</b> favors non-NCS due to social norms | <input type="radio"/>       | <input type="radio"/>             | <input type="radio"/> |
| <b>National ministry or department</b> favors non-NCS due to social norms              | <input type="radio"/>       | <input type="radio"/>             | <input type="radio"/> |

---

3.28.01 Provide any additional information that might help us understand constraints related to "social norms favoring non-NCS uses" for this project.

---



---

Page Break

For constraints related to "concerns over negative equity impacts of NCS," indicate if the following constrain the implementation of your project.

|                                                                                           | Yes (Applies to my project) | No (Does not apply to my project) | Unsure                |
|-------------------------------------------------------------------------------------------|-----------------------------|-----------------------------------|-----------------------|
| <b>Land manager/operator</b> concerns over negative equity impacts                        | <input type="radio"/>       | <input type="radio"/>             | <input type="radio"/> |
| <b>Local community or government</b> concerns over negative equity impacts                | <input type="radio"/>       | <input type="radio"/>             | <input type="radio"/> |
| <b>District/County or State/Province government</b> concerns over negative equity impacts | <input type="radio"/>       | <input type="radio"/>             | <input type="radio"/> |
| <b>National ministry or department</b> concerns over negative equity impacts              | <input type="radio"/>       | <input type="radio"/>             | <input type="radio"/> |

Provide any additional information that might help us understand constraints related to "concerns over negative equity impacts of NCS" for this project.

---

Page Break



For constraints related to "lack of opportunity to participate in or influence the implementation of NCS due to gender, race, ethnicity, or other dimensions of identity," indicate if the following constrain the implementation of your project.

|                                                                                                                                  | Yes (Applies to my project) | No (Does not apply to my project) | Unsure                |
|----------------------------------------------------------------------------------------------------------------------------------|-----------------------------|-----------------------------------|-----------------------|
| <b>Gender inequities</b> define the lack of opportunity to participate in or influence the implementation of NCS                 | <input type="radio"/>       | <input type="radio"/>             | <input type="radio"/> |
| <b>Racial inequities</b> define the lack of opportunity to participate in or influence the implementation of NCS                 | <input type="radio"/>       | <input type="radio"/>             | <input type="radio"/> |
| <b>Ethnic inequities</b> define the lack of opportunity to participate in or influence the implementation of NCS                 | <input type="radio"/>       | <input type="radio"/>             | <input type="radio"/> |
| <b>Other inequities</b> define the lack of opportunity to participate in or influence the implementation of NCS (please specify) | <input type="radio"/>       | <input type="radio"/>             | <input type="radio"/> |

Provide any additional information that might help us understand constraints related to "lack of opportunity to participate in or influence the implementation of NCS due to gender, race, ethnicity, or other dimensions of identity" for this project.

---

For constraints related to "limited social learning or exchange networks for NCS," indicate if the following constrain the implementation of your project.

|                                                                                                           | Yes (Applies to my project) | No (Does not apply to my project) | Unsure                |
|-----------------------------------------------------------------------------------------------------------|-----------------------------|-----------------------------------|-----------------------|
| <b>Land manager/operator</b> limited access to social learning or exchange networks                       | <input type="radio"/>       | <input type="radio"/>             | <input type="radio"/> |
| <b>Local community or government</b> access to social learning or exchange networks                       | <input type="radio"/>       | <input type="radio"/>             | <input type="radio"/> |
| <b>District/County or State/Province</b> officials lacking access to social learning or exchange networks | <input type="radio"/>       | <input type="radio"/>             | <input type="radio"/> |
| <b>National ministry or department</b> officials lacking access to social learning or exchange networks   | <input type="radio"/>       | <input type="radio"/>             | <input type="radio"/> |

Provide any additional information that might help us understand constraints related to "limited social learning or exchange networks for NCS" for this project.

---

Page Break

---

For constraints related to "difficulty identifying, engaging, or coordinating with relevant actors," indicate if the following constrain the implementation of your project.

|                                                                                                                  | Yes (Applies to my project) | No (Does not apply to my project) | Unsure                |
|------------------------------------------------------------------------------------------------------------------|-----------------------------|-----------------------------------|-----------------------|
| It is difficult to identify, engage, or coordinate with <b>government actors or organizations</b>                | <input type="radio"/>       | <input type="radio"/>             | <input type="radio"/> |
| It is difficult to identify, engage, or coordinate with <b>Indigenous individuals or communities</b>             | <input type="radio"/>       | <input type="radio"/>             | <input type="radio"/> |
| It is difficult to identify, engage, or coordinate with <b>non-indigenous individuals or communities</b>         | <input type="radio"/>       | <input type="radio"/>             | <input type="radio"/> |
| It is difficult to identify, engage, or coordinate with <b>NGOs</b>                                              | <input type="radio"/>       | <input type="radio"/>             | <input type="radio"/> |
| It is difficult to identify, engage, or coordinate with <b>other individuals or communities</b> (please specify) | <input type="radio"/>       | <input type="radio"/>             | <input type="radio"/> |

Provide any additional information that might help us understand constraints related to "difficulty identifying, engaging, or coordinating with relevant actors" for this project.

---

Page Break

For constraints related to "insecure or uncertain rights to manage or sell property," indicate if the following constrain the implementation of your project.

|                                                                                                         | Yes (Applies to my project) | No (Does not apply to my project) | Unsure                |
|---------------------------------------------------------------------------------------------------------|-----------------------------|-----------------------------------|-----------------------|
| Insecure or uncertain rights to manage or sell property owned/managed by <b>land managers/operators</b> | <input type="radio"/>       | <input type="radio"/>             | <input type="radio"/> |
| Insecure or uncertain rights to manage or sell property owned/managed by <b>local communities</b>       | <input type="radio"/>       | <input type="radio"/>             | <input type="radio"/> |
| Insecure or uncertain rights to manage property owned by <b>Districts/Counties or States/Provinces</b>  | <input type="radio"/>       | <input type="radio"/>             | <input type="radio"/> |
| Insecure or uncertain rights to manage property owned by <b>National ministries or departments</b>      | <input type="radio"/>       | <input type="radio"/>             | <input type="radio"/> |

Provide any additional information that might help us understand constraints related to "insecure or uncertain rights to manage or sell property" for this project.

---

Page Break

For constraints related to "insecure, uncertain, or lack of rights to use natural resources," indicate if the following constrain the implementation of your project.

|                                                                                                                                | Yes (Applies to my project) | No (Does not apply to my project) | Unsure                |
|--------------------------------------------------------------------------------------------------------------------------------|-----------------------------|-----------------------------------|-----------------------|
| Insecure, uncertain, or lack of rights to use natural resources owned/managed by <b>land managers/operators</b>                | <input type="radio"/>       | <input type="radio"/>             | <input type="radio"/> |
| Insecure, uncertain, or lack of rights to use natural resources owned/managed by <b>local communities</b>                      | <input type="radio"/>       | <input type="radio"/>             | <input type="radio"/> |
| Insecure, uncertain, or lack of rights to use natural resources owned/managed by <b>Districts/Counties or States/Provinces</b> | <input type="radio"/>       | <input type="radio"/>             | <input type="radio"/> |
| Insecure, uncertain, or lack of rights to use natural resources owned/managed by <b>National ministries or departments</b>     | <input type="radio"/>       | <input type="radio"/>             | <input type="radio"/> |

Provide any additional information that might help us understand constraints related to "insecure, uncertain, or lack of rights to use natural resources " for this project.

---

Page Break

For constraints related to "regulatory barriers to production, transport, or sale of NCS outputs (for example, permits or licensing)," indicate if the following constrain the implementation of your project.

|                                                                                                                     | Yes (Applies to my project) | No (Does not apply to my project) | Unsure                |
|---------------------------------------------------------------------------------------------------------------------|-----------------------------|-----------------------------------|-----------------------|
| Regulatory barriers to production, transport or sale introduced by <b>local communities or government</b>           | <input type="radio"/>       | <input type="radio"/>             | <input type="radio"/> |
| <b>District/County or State-Province</b> -level regulatory barriers to production, transport or sale of NCS         | <input type="radio"/>       | <input type="radio"/>             | <input type="radio"/> |
| Regulatory barriers to production, transport or sale of NCS introduced by <b>National ministries or departments</b> | <input type="radio"/>       | <input type="radio"/>             | <input type="radio"/> |

Provide any additional information that might help us understand constraints related to "regulatory barriers to production, transport, or sale of NCS outputs (for example, permits or licensing)" for this project.

---

Page Break

For constraints related to "insecure or uncertain NCS benefit sharing," indicate if the following constrain the implementation of your project.

|                                                                                           | Yes (Applies to my project) | No (Does not apply to my project) | Unsure                |
|-------------------------------------------------------------------------------------------|-----------------------------|-----------------------------------|-----------------------|
| Insecure or uncertain benefit sharing among <b>land managers/operators</b>                | <input type="radio"/>       | <input type="radio"/>             | <input type="radio"/> |
| Insecure or uncertain benefit sharing among <b>local communities</b>                      | <input type="radio"/>       | <input type="radio"/>             | <input type="radio"/> |
| Insecure or uncertain benefit sharing among <b>Districts/Counties or States/Provinces</b> | <input type="radio"/>       | <input type="radio"/>             | <input type="radio"/> |
| Insecure or uncertain benefit sharing among <b>National ministries or departments</b>     | <input type="radio"/>       | <input type="radio"/>             | <input type="radio"/> |

Provide any additional information that might help us understand constraints related to "unsecure or uncertain NCS benefit sharing" for this project.

---

Page Break

For constraints related to "NCS-related corruption," indicate if the following constrain the implementation of your project.

|                                                                                                 | Yes (Applies to my project) | No (Does not apply to my project) | Unsure                |
|-------------------------------------------------------------------------------------------------|-----------------------------|-----------------------------------|-----------------------|
| NCS-related corruption among <b>land managers/operators</b>                                     | <input type="radio"/>       | <input type="radio"/>             | <input type="radio"/> |
| NCS-related corruption among <b>local communities</b>                                           | <input type="radio"/>       | <input type="radio"/>             | <input type="radio"/> |
| NCS-related corruption among <b>Districts/Counties or States/Provinces</b> government personnel | <input type="radio"/>       | <input type="radio"/>             | <input type="radio"/> |
| NCS-related corruption among <b>National ministry or department</b> personnel                   | <input type="radio"/>       | <input type="radio"/>             | <input type="radio"/> |

Provide any additional information that might help us understand constraints related to "NCS-related corruption" for this project.

---

---

Page Break

---



For constraints related to "unclear laws and policies related to NCS outputs/markets," indicate if the following constrain the implementation of your project.

|                                                                                                | Yes (Applies to my project) | No (Does not apply to my project) | Unsure                |
|------------------------------------------------------------------------------------------------|-----------------------------|-----------------------------------|-----------------------|
| Unclear laws or policies introduced by <b>local communities or governments</b>                 | <input type="radio"/>       | <input type="radio"/>             | <input type="radio"/> |
| Unclear laws or policies introduced by <b>Districts/Counties or States/Provinces</b>           | <input type="radio"/>       | <input type="radio"/>             | <input type="radio"/> |
| Unclear laws or policies introduced by <b>National organizations, agencies, or departments</b> | <input type="radio"/>       | <input type="radio"/>             | <input type="radio"/> |

Provide any additional information that might help us understand constraints related to "unclear laws and policies related to NCS outputs/markets" for this project.

---

Page Break

For constraints related to "lack of policy coordination (for example, between sectors or between different administrative units)," indicate if the following constrain the implementation of your project.

|                                                                                           | Yes (Applies to my project) | No (Does not apply to my project) | Unsure                |
|-------------------------------------------------------------------------------------------|-----------------------------|-----------------------------------|-----------------------|
| Lack of policy coordination among <b>local communities or governments</b>                 | <input type="radio"/>       | <input type="radio"/>             | <input type="radio"/> |
| Lack of policy coordination among <b>districts/counties or States/Provinces</b>           | <input type="radio"/>       | <input type="radio"/>             | <input type="radio"/> |
| Lack of policy coordination among <b>national organizations, agencies, or departments</b> | <input type="radio"/>       | <input type="radio"/>             | <input type="radio"/> |

Provide any additional information that might help us understand constraints related to "lack of policy coordination (for example, between sectors or between different administrative units)" for this project.

---

---

Page Break

For constraints related to "uncertain enforcement of environmental laws," indicate if the following constraint the implementation of your project.

|                                                                                                         | Yes (Applies to my project) | No (Does not apply to my project) | Unsure                |
|---------------------------------------------------------------------------------------------------------|-----------------------------|-----------------------------------|-----------------------|
| Uncertain enforcement of environmental rules by <b>land managers/operators</b>                          | <input type="radio"/>       | <input type="radio"/>             | <input type="radio"/> |
| Uncertain enforcement of environmental rules by <b>local communities or governments</b>                 | <input type="radio"/>       | <input type="radio"/>             | <input type="radio"/> |
| Uncertain enforcement of environmental rules by <b>Districts/Counties or States/Provinces</b>           | <input type="radio"/>       | <input type="radio"/>             | <input type="radio"/> |
| Uncertain enforcement of environmental rules by <b>National organizations, agencies, or departments</b> | <input type="radio"/>       | <input type="radio"/>             | <input type="radio"/> |

Provide any additional information that might help us understand constraints related to "uncertain enforcement of environmental laws" for this project.

---

Page Break

For constraints related to "weak monitoring and enforcement of NCS agreements," indicate if the following constrain the implementation of your project.

|                                                                                                              | Yes (Applies to my project) | No (Does not apply to my project) | Unsure                |
|--------------------------------------------------------------------------------------------------------------|-----------------------------|-----------------------------------|-----------------------|
| Weak monitoring and enforcement of NCS agreements by <b>land managers/operators</b>                          | <input type="radio"/>       | <input type="radio"/>             | <input type="radio"/> |
| Weak monitoring and enforcement of NCS agreements by <b>local communities or governments</b>                 | <input type="radio"/>       | <input type="radio"/>             | <input type="radio"/> |
| Weak monitoring and enforcement of NCS agreements by <b>Districts/Countries or States/Provinces</b>          | <input type="radio"/>       | <input type="radio"/>             | <input type="radio"/> |
| Weak monitoring and enforcement of NCS agreements by <b>National organizations, agencies, or departments</b> | <input type="radio"/>       | <input type="radio"/>             | <input type="radio"/> |

Provide any additional information that might help us understand constraints related to "weak monitoring and enforcement of NCS agreements" for this project.

---

Page Break

For constraints related to "violent conflict or the perceived threat of violence," indicate if the following constrain the implementation of your project.

|                                                                                                                                          | Yes (Applies to my project) | No (Does not apply to my project) | Unsure                |
|------------------------------------------------------------------------------------------------------------------------------------------|-----------------------------|-----------------------------------|-----------------------|
| Violent conflict or the perceived threat of violence between <b>non-government individuals or groups</b>                                 | <input type="radio"/>       | <input type="radio"/>             | <input type="radio"/> |
| Violent conflict or the perceived threat of violence conflict between <b>government forces</b>                                           | <input type="radio"/>       | <input type="radio"/>             | <input type="radio"/> |
| Violent conflict or the perceived threat of violence conflicts between <b>non-government individuals or groups and government forces</b> | <input type="radio"/>       | <input type="radio"/>             | <input type="radio"/> |

Provide any additional information that might help us understand constraints related to "violent conflict or the perceived threat of violence" for this project.

---

Page Break

For constraints related to "lack of dispute resolution mechanisms," indicate if the following constrain the implementation of your project.

|                                                                                         | Yes (Applies to my project) | No (Does not apply to my project) | Unsure                |
|-----------------------------------------------------------------------------------------|-----------------------------|-----------------------------------|-----------------------|
| Lack of dispute resolution mechanisms for <b>land managers/operators</b>                | <input type="radio"/>       | <input type="radio"/>             | <input type="radio"/> |
| Lack of dispute resolution mechanisms for <b>local communities or governments</b>       | <input type="radio"/>       | <input type="radio"/>             | <input type="radio"/> |
| Lack of dispute resolution mechanisms for <b>Districts/Counties or States/Provinces</b> | <input type="radio"/>       | <input type="radio"/>             | <input type="radio"/> |
| Lack of dispute resolution mechanisms for <b>National forces or organizations</b>       | <input type="radio"/>       | <input type="radio"/>             | <input type="radio"/> |

Provide any additional information that might help us understand constraints related to "lack of dispute resolution mechanisms," for this project.

---

Page Break

For constraints related to "financial or other incentives for non-NCS (for example, subsidies, reduced taxes, access to credit or insurance)," indicate if the following constrain the implementation of your project.

|                                                                                                     | Yes (Applies to my project) | No (Does not apply to my project) | Unsure                |
|-----------------------------------------------------------------------------------------------------|-----------------------------|-----------------------------------|-----------------------|
| Financial of other incentives introduced by <b>land managers/operators</b>                          | <input type="radio"/>       | <input type="radio"/>             | <input type="radio"/> |
| Financial or other incentives introduced by <b>local communities or governments</b>                 | <input type="radio"/>       | <input type="radio"/>             | <input type="radio"/> |
| Financial or other incentives introduced by <b>districts/counties or states/provinces</b>           | <input type="radio"/>       | <input type="radio"/>             | <input type="radio"/> |
| Financial or other incentives introduced by <b>national organizations, agencies, or departments</b> | <input type="radio"/>       | <input type="radio"/>             | <input type="radio"/> |

Provide any additional information that might help us understand constraints related to "financial or other incentives for non-NCS (for example, subsidies, reduced taxes, access to credit or insurance)" for this project.

---

Page Break

For constraints related to "politically influential interests favoring non-NCS," indicate if the following constrain the implementation of your project.

|                                                                                                                       | Yes (Applies to my project) | No (Does not apply to my project) | Unsure                |
|-----------------------------------------------------------------------------------------------------------------------|-----------------------------|-----------------------------------|-----------------------|
| Politically influential interests advocating against NCS with <b>land managers/operators</b>                          | <input type="radio"/>       | <input type="radio"/>             | <input type="radio"/> |
| Politically influential interests advocating against NCS with <b>local communities or governments</b>                 | <input type="radio"/>       | <input type="radio"/>             | <input type="radio"/> |
| Politically influential interests advocating against NCS with <b>Districts/Countries or States/Provinces</b>          | <input type="radio"/>       | <input type="radio"/>             | <input type="radio"/> |
| Politically influential interests advocating against NCS with <b>National organizations, agencies, or departments</b> | <input type="radio"/>       | <input type="radio"/>             | <input type="radio"/> |

Provide any additional information that might help us understand constraints related to "politically influential interests favoring non-NCS" for this project.

---

Page Break



For constraints related to "other constraint 1: *[respondent's write-in constraint 1 in constraints list]*" indicate if the following statements apply to your project.

|                                                                                                                                                                     | Yes (Applies to my project) | No (Does not apply to my project) | Unsure                |
|---------------------------------------------------------------------------------------------------------------------------------------------------------------------|-----------------------------|-----------------------------------|-----------------------|
| Other constraint 1: <i>[respondent's write-in constraint 1]</i> affects <b>local communities or governments</b> to constrain project implementation                 | <input type="radio"/>       | <input type="radio"/>             | <input type="radio"/> |
| Other constraint 1: <i>[respondent's write-in constraint 1]</i> affects <b>Districts/Counties or States/Provinces</b> to constrain project implementation           | <input type="radio"/>       | <input type="radio"/>             | <input type="radio"/> |
| Other constraint 1: <i>[respondent's write-in constraint 1]</i> affects <b>National organizations, agencies, or departments</b> to constrain project implementation | <input type="radio"/>       | <input type="radio"/>             | <input type="radio"/> |
| <b>Limited or uncertain availability</b> of other constraint 1: <i>[respondent's write-in constraint 1]</i>                                                         | <input type="radio"/>       | <input type="radio"/>             | <input type="radio"/> |
| <b>Limited or uncertain quality</b> of other constraint 1: <i>[respondent's write-in constraint 1]</i>                                                              | <input type="radio"/>       | <input type="radio"/>             | <input type="radio"/> |
| <b>High or uncertain price</b> of other constraint 1: <i>[respondent's write-in constraint 1]</i>                                                                   | <input type="radio"/>       | <input type="radio"/>             | <input type="radio"/> |

Provide any additional information that might help us understand constraints related to "other constraint 1: *[respondent's write-in constraint 1]*" for this project.

---

For constraints related to "other constraint 2: *[respondent's write-in constraint 2]*" indicate if the following statements apply to your project.

|                                                                                                                                                                     | Yes (Applies to my project) | No (Does not apply to my project) | Unsure                |
|---------------------------------------------------------------------------------------------------------------------------------------------------------------------|-----------------------------|-----------------------------------|-----------------------|
| Other constraint 2: <i>[respondent's write-in constraint 2]</i> affects <b>local communities or governments</b> to constrain project implementation                 | <input type="radio"/>       | <input type="radio"/>             | <input type="radio"/> |
| Other constraint 2: <i>[respondent's write-in constraint 2]</i> affects <b>Districts/Counties or States/Provinces</b> to constrain project implementation           | <input type="radio"/>       | <input type="radio"/>             | <input type="radio"/> |
| Other constraint 2: <i>[respondent's write-in constraint 2]</i> affects <b>National organizations, agencies, or departments</b> to constrain project implementation | <input type="radio"/>       | <input type="radio"/>             | <input type="radio"/> |
| <b>Limited or uncertain availability</b> of other constraint 2: <i>[respondent's write-in constraint 2]</i>                                                         | <input type="radio"/>       | <input type="radio"/>             | <input type="radio"/> |
| <b>Limited or uncertain quality</b> of other constraint 2: <i>[respondent's write-in constraint 2]</i>                                                              | <input type="radio"/>       | <input type="radio"/>             | <input type="radio"/> |
| <b>High or uncertain price</b> of other constraint 2: <i>[respondent's write-in constraint 2]</i>                                                                   | <input type="radio"/>       | <input type="radio"/>             | <input type="radio"/> |

Provide any additional information that might help us understand constraints related to ""other constraint 2: *[respondent's write-in constraint 2]*" for this project.

Page Break

For constraints related to "other constraint 3: *[respondent's write-in constraint 3]*" indicate if the following statements apply to your project.

|                                                                                                                                                                     | Yes (Applies to my project) | No (Does not apply to my project) | Unsure                |
|---------------------------------------------------------------------------------------------------------------------------------------------------------------------|-----------------------------|-----------------------------------|-----------------------|
| Other constraint 3: <i>[respondent's write-in constraint 3]</i> affects <b>local communities or governments</b> to constrain project implementation                 | <input type="radio"/>       | <input type="radio"/>             | <input type="radio"/> |
| Other constraint 3: <i>[respondent's write-in constraint 3]</i> affects <b>Districts/Counties or States/Provinces</b> to constrain project implementation           | <input type="radio"/>       | <input type="radio"/>             | <input type="radio"/> |
| Other constraint 3: <i>[respondent's write-in constraint 3]</i> affects <b>National organizations, agencies, or departments</b> to constrain project implementation | <input type="radio"/>       | <input type="radio"/>             | <input type="radio"/> |
| <b>Limited or uncertain availability</b> of other constraint 3: <i>[respondent's write-in constraint 3]</i>                                                         | <input type="radio"/>       | <input type="radio"/>             | <input type="radio"/> |
| <b>Limited or uncertain quality</b> of other constraint 3: <i>[respondent's write-in constraint 3]</i>                                                              | <input type="radio"/>       | <input type="radio"/>             | <input type="radio"/> |
| <b>High or uncertain price</b> of other constraint 3: <i>[respondent's write-in constraint 3]</i>                                                                   | <input type="radio"/>       | <input type="radio"/>             | <input type="radio"/> |

Provide any additional information that might help us understand constraints related to "other constraint 3: *[respondent's write-in constraint 3]*" for this project.

---

End of Block: Module 2: Additional information on top constraints

---

Start of Block: Module 3: Solutions to Constraints

The following set of questions will ask about real or potential solutions to the constraints you identified as most relevant to your project.

---

Page Break

---

Thinking only about your project, how might the constraint related to "planting stock or other materials for NCS pathway" be overcome or at least mitigated?

Please provide your answer in one to three sentences and identify the actors (who) and the actions (what) that you believe might address this constraint.

---

---

Are any of these actions that you identified currently being taken, or are efforts underway to take these actions?

- ☐ Yes
  - ☐ No
  - ☐ Unsure
  - ☐ Prefer not to answer
-

Do you have any information on the costs associated with this solution or these solutions?

*Note: We do not ask about any cost information in this survey.*

- ☐ Yes
- ☐ No
- ☐ Unsure
- ☐ Prefer not to answer

---

Page Break

Thinking only about your project, how might the constraint related to "labor (external or own) for NCS pathway," be overcome or at least mitigated?

Please provide your answer in one to three sentences and identify the actors (who) and the activities (what) that you believe might address this constraint.

---

---

Are any of these actions that you identified currently being taken, or are efforts underway to take these actions?

- ☐ Yes
- ☐ No
- ☐ Unsure
- ☐ Prefer not to answer

Do you have any information on the costs associated with this solution or these solutions?

Note: We do not ask about any cost information in this survey.

- ☐ Yes
- ☐ No
- ☐ Unsure
- ☐ Prefer not to answer

---

Page Break

Thinking only about your project, how might the constraint related to "suitable land for NCS pathway" be overcome or at least mitigated?

Please provide your answer in one to three sentences and identify the actors (who) and the activities (what) that you believe might address this constraint.

---

---

Are any of these actions that you identified currently being taken, or are efforts underway to take these actions?

- ☐ Yes
  - ☐ No
  - ☐ Unsure
  - ☐ Prefer not to answer
-

Do you have any information on the costs associated with this solution or these solutions?

Note: We do not ask about any cost information in this survey.

- ☐ Yes
- ☐ No
- ☐ Unsure
- ☐ Prefer not to answer

---

Page Break

Thinking only about your project, how might the constraint related to "water for NCS pathway" be overcome or at least mitigated?

Please provide your answer in one to three sentences and identify the actors (who) and the activities (what) that you believe might address this constraint.

---

---

Are any of these actions that you identified currently being taken, or are efforts underway to take these actions?

- ☐ Yes
  - ☐ No
  - ☐ Unsure
  - ☐ Prefer not to answer
-

Do you have any information on the costs associated with this solution or these solutions?

Note: We do not ask about any cost information in this survey.

- ☐ Yes
- ☐ No
- ☐ Unsure
- ☐ Prefer not to answer

---

Page Break

Thinking only about your project, how might the constraint related to "land manager/operator access to credit for NCS" be overcome or at least mitigated?

Please provide your answer in one to three sentences and identify the actors (who) and the activities (what) that you believe might address this constraint.

---

---

Are any of these actions that you identified currently being taken, or are efforts underway to take these actions?

- ☐ Yes
  - ☐ No
  - ☐ Unsure
  - ☐ Prefer not to answer
-



Do you have any information on the costs associated with this solution or these solutions?

Note: We do not ask about any cost information in this survey.

- ☐ Yes
- ☐ No
- ☐ Unsure
- ☐ Prefer not to answer

---

Page Break

Thinking only about your project, how might the constraint related to "land manager/operator access to other funding for NCS" be overcome or at least mitigated?

Please provide your answer in one to three sentences and identify the actors (who) and the activities (what) that you believe might address this constraint.

---

Are any of these actions that you identified currently being taken, or are efforts underway to take these actions?

- ☐ Yes
- ☐ No
- ☐ Unsure
- ☐ Prefer not to answer

Do you have any information on the costs associated with this solution or these solutions?

Note: We do not ask about any cost information in this survey.

- ☐ Yes
- ☐ No
- ☐ Unsure
- ☐ Prefer not to answer

---

Page Break

Thinking only about your project, how might the constraint related to "land manager/operator insurance for NCS assets or outputs" be overcome or at least mitigated?

Please provide your answer in one to three sentences and identify the actors (who) and the activities (what) that you believe might address this constraint.

---

Are any of these actions that you identified currently being taken, or are efforts underway to take these actions?

- ☐ Yes
  - ☐ No
  - ☐ Unsure
  - ☐ Prefer not to answer
- 

Do you have any information on the costs associated with this solution or these solutions?

Note: We do not ask about any cost information in this survey.

- ☐ Yes
  - ☐ No
  - ☐ Unsure
  - ☐ Prefer not to answer
- 

Page Break

---

Thinking only about your project, how might the constraint related to "project access to credit for NCS" be overcome or at least mitigated?

Please provide your answer in one to three sentences and identify the actors (who) and the activities (what) that you believe might address this constraint.

---

Are any of these actions that you identified currently being taken, or are efforts underway to take these actions?

- ☐ Yes
- ☐ No
- ☐ Unsure
- ☐ Prefer not to answer

---

Do you have any information on the costs associated with this solution or these solutions?

Note: We do not ask about any cost information in this survey.

- ☐ Yes
  - ☐ No
  - ☐ Unsure
  - ☐ Prefer not to answer
- 

Page Break

---

Thinking only about your project, how might the constraint related to "project access to other funding for NCS" be overcome or at least mitigated?

Please provide your answer in one to three sentences and identify the actors (who) and the activities (what) that you believe might address this constraint.

---

---

Are any of these actions that you identified currently being taken, or are efforts underway to take these actions?

- ☐ Yes
  - ☐ No
  - ☐ Unsure
  - ☐ Prefer not to answer
-

Do you have any information on the costs associated with this solution or these solutions?

Note: We do not ask about any cost information in this survey.

- ☐ Yes
  - ☐ No
  - ☐ Unsure
  - ☐ Prefer not to answer
- 

Page Break

---

Thinking only about your project, how might the constraint related to "donor/creditor relationships or reporting" be overcome or at least mitigated?

Please provide your answer in one to three sentences and identify the actors (who) and the activities (what) that you believe might address this constraint.

---

---

Are any of these actions that you identified currently being taken, or are efforts underway to take these actions?

- ☐ Yes
  - ☐ No
  - ☐ Unsure
  - ☐ Prefer not to answer
-

Do you have any information on the costs associated with this solution or these solutions?

Note: We do not ask about any cost information in this survey.

- ☐ Yes
  - ☐ No
  - ☐ Unsure
  - ☐ Prefer not to answer
- 

Page Break

---

Thinking only about your project, how might the constraint related to "markets for NCS outputs (for example, food or wood) produced by the land manager/operator" be overcome or at least mitigated?

Please provide your answer in one to three sentences and identify the actors (who) and the activities (what) that you believe might address this constraint.

---

---

Are any of these actions that you identified currently being taken, or are efforts underway to take these actions?

- ☐ Yes
  - ☐ No
  - ☐ Unsure
  - ☐ Prefer not to answer
-

Do you have any information on the costs associated with this solution or these solutions?

Note: We do not ask about any cost information in this survey.

- ☐ Yes
  - ☐ No
  - ☐ Unsure
  - ☐ Prefer not to answer
- 

Page Break

---

Thinking only about your project, how might the constraint related to "markets for carbon sequestered by the NCS" be overcome or at least mitigated?

Please provide your answer in one to three sentences and identify the actors (who) and the activities (what) that you believe might address this constraint.

---

---

Are any of these actions that you identified currently being taken, or are efforts underway to take these actions?

- ☐ Yes
  - ☐ No
  - ☐ Unsure
  - ☐ Prefer not to answer
-

Do you have any information on the costs associated with this solution or these solutions?

Note: We do not ask about any cost information in this survey.

- ☐ Yes
  - ☐ No
  - ☐ Unsure
  - ☐ Prefer not to answer
- 

Page Break

---

Thinking only about your project, how might the constraint related to "markets for ecosystem services (for example, water quality or flow regulation) or biodiversity provided by the NCS" be overcome or at least mitigated?

Please provide your answer in one to three sentences and identify the actors (who) and the activities (what) that you believe might address this constraint.

---

---

Are any of these actions that you identified currently being taken, or are efforts underway to take these actions?

- ☐ Yes
  - ☐ No
  - ☐ Unsure
  - ☐ Prefer not to answer
-



Do you have any information on the costs associated with this solution or these solutions?

Note: We do not ask about any cost information in this survey.

- ☐ Yes
  - ☐ No
  - ☐ Unsure
  - ☐ Prefer not to answer
- 

Page Break

---

Thinking only about your project, how might the constraint related to "prices for NCS outputs (for example, food or wood) produced by the land manager/operator" be overcome or at least mitigated?

Please provide your answer in one to three sentences and identify the actors (who) and the activities (what) that you believe might address this constraint.

---

---

Are any of these actions that you identified currently being taken, or are efforts underway to take these actions?

- ☐ Yes
  - ☐ No
  - ☐ Unsure
  - ☐ Prefer not to answer
-

Do you have any information on the costs associated with this solution or these solutions?

Note: We do not ask about any cost information in this survey.

- ☐ Yes
- ☐ No
- ☐ Unsure
- ☐ Prefer not to answer

---

Page Break

Thinking only about your project, how might the constraint related to "prices for carbon sequestered by the NCS" be overcome or at least mitigated?

Please provide your answer in one to three sentences and identify the actors (who) and the activities (what) that you believe might address this constraint.

---

---

Are any of these actions that you identified currently being taken, or are efforts underway to take these actions?

- ☐ Yes
  - ☐ No
  - ☐ Unsure
  - ☐ Prefer not to answer
-

Do you have any information on the costs associated with this solution or these solutions?

Note: We do not ask about any cost information in this survey.

- ☐ Yes
  - ☐ No
  - ☐ Unsure
  - ☐ Prefer not to answer
- 

Page Break

---

Thinking only about your project, how might the constraint related to "prices for ecosystem services (for example, water quality or flow regulation) or biodiversity provided by the NCS" be overcome or at least mitigated?

Please provide your answer in one to three sentences and identify the actors (who) and the activities (what) that you believe might address this constraint.

---

---

Are any of these actions that you identified currently being taken, or are efforts underway to take these actions?

- ☐ Yes
  - ☐ No
  - ☐ Unsure
  - ☐ Prefer not to answer
-

Do you have any information on the costs associated with this solution or these solutions?

Note: We do not ask about any cost information in this survey.

- ☐ Yes
- ☐ No
- ☐ Unsure
- ☐ Prefer not to answer

---

Page Break

Thinking only about your project, how might the constraint related to "greater profitability of alternative land uses: *[respondent-identified land use]*" be overcome or at least mitigated?

Please provide your answer in one to three sentences and identify the actors (who) and the activities (what) that you believe might address this constraint.

---

---

Are any of these actions that you identified currently being taken, or are efforts underway to take these actions?

- ☐ Yes
  - ☐ No
  - ☐ Unsure
  - ☐ Prefer not to answer
-

Do you have any information on the costs associated with this solution or these solutions?

Note: We do not ask about any cost information in this survey.

- ☐ Yes
  - ☐ No
  - ☐ Unsure
  - ☐ Prefer not to answer
- 

Page Break

---

Thinking only about your project, how might the constraint related to "land manager/operator literacy, numeracy or technological capabilities" be overcome or at least mitigated?

Please provide your answer in one to three sentences and identify the actors (who) and the activities (what) that you believe might address this constraint.

---

---

Are any of these actions that you identified currently being taken, or are efforts underway to take these actions?

- ☐ Yes
  - ☐ No
  - ☐ Unsure
  - ☐ Prefer not to answer
-

Do you have any information on the costs associated with this solution or these solutions?

Note: We do not ask about any cost information in this survey.

- ☐ Yes
  - ☐ No
  - ☐ Unsure
  - ☐ Prefer not to answer
- 

Page Break

---

Thinking only about your project, how might the constraint related to "information about how to design or begin the NCS" be overcome or at least mitigated?

Please provide your answer in one to three sentences and identify the actors (who) and the activities (what) that you believe might address this constraint.

---

---

Are any of these actions that you identified currently being taken, or are efforts underway to take these actions?

- ☐ Yes
  - ☐ No
  - ☐ Unsure
  - ☐ Prefer not to answer
-

Do you have any information on the costs associated with this solution or these solutions?

Note: We do not ask about any cost information in this survey.

- ☐ Yes
  - ☐ No
  - ☐ Unsure
  - ☐ Prefer not to answer
- 

Page Break

---

Thinking only about your project, how might the constraint related to "information about how to manage the NCS (for example, maintenance activities, monitoring activities, or other inputs and their timing)" be overcome or at least mitigated?

Please provide your answer in one to three sentences and identify the actors (who) and the activities (what) that you believe might address this constraint.

---

---

Are any of these actions that you identified currently being taken, or are efforts underway to take these actions?

- ☐ Yes
  - ☐ No
  - ☐ Unsure
  - ☐ Prefer not to answer
-

Do you have any information on the costs associated with this solution or these solutions?

Note: We do not ask about any cost information in this survey.

- ☐ Yes
  - ☐ No
  - ☐ Unsure
  - ☐ Prefer not to answer
- 

Page Break

---

Thinking only about your project, how might the constraint related to "availability of technical advice for land managers/operators (for example, extension services)" be overcome or at least mitigated?

Please provide your answer in one to three sentences and identify the actors (who) and the activities (what) that you believe might address this constraint.

---

---

Are any of these actions that you identified currently being taken, or are efforts underway to take these actions?

- ☐ Yes
  - ☐ No
  - ☐ Unsure
  - ☐ Prefer not to answer
-



Do you have any information on the costs associated with this solution or these solutions?

Note: We do not ask about any cost information in this survey.

- ☐ Yes
  - ☐ No
  - ☐ Unsure
  - ☐ Prefer not to answer
- 

Page Break

---

Thinking only about your project, how might the constraint related to "information about yields, inputs, and profits" be overcome or at least mitigated?

Please provide your answer in one to three sentences and identify the actors (who) and the activities (what) that you believe might address this constraint.

---

---

Are any of these actions that you identified currently being taken, or are efforts underway to take these actions?

- ☐ Yes
  - ☐ No
  - ☐ Unsure
  - ☐ Prefer not to answer
-

Do you have any information on the costs associated with this solution or these solutions?

Note: We do not ask about any cost information in this survey.

- ☐ Yes
  - ☐ No
  - ☐ Unsure
  - ☐ Prefer not to answer
- 

Page Break

---

Thinking only about your project, how might constraints related to "information about market access or prices" be overcome or at least mitigated?

Please provide your answer in one to three sentences and identify the actors (who) and the activities (what) that you believe might address this constraint.

---

---

Are any of these actions that you identified currently being taken, or are efforts underway to take these actions?

- ☐ Yes
  - ☐ No
  - ☐ Unsure
  - ☐ Prefer not to answer
-

Do you have any information on the costs associated with this solution or these solutions?

Note: We do not ask about any cost information in this survey.

- ☐ Yes
  - ☐ No
  - ☐ Unsure
  - ☐ Prefer not to answer
- 

Page Break

---

Thinking only about your project, how might the constraint related to "information about on-site co-benefits of NCS (for example, soil fertility, shade for livestock, or income diversification)" be overcome or at least mitigated?

Please provide your answer in one to three sentences and identify the actors (who) and the activities (what) that you believe might address this constraint.

---

---

Are any of these actions that you identified currently being taken, or are efforts underway to take these actions?

- ☐ Yes
  - ☐ No
  - ☐ Unsure
  - ☐ Prefer not to answer
-

Do you have any information on the costs associated with this solution or these solutions?

Note: We do not ask about any cost information in this survey.

- ☐ Yes
  - ☐ No
  - ☐ Unsure
  - ☐ Prefer not to answer
- 

Page Break

---

Thinking only about your project, how might the constraint related to "preferences for non-NCS land uses," be overcome or at least mitigated?

Please provide your answer in one to three sentences and identify the actors (who) and the activities (what) that you believe might address this constraint.

---

---

Are any of these actions that you identified currently being taken, or are efforts underway to take these actions?

- ☐ Yes
  - ☐ No
  - ☐ Unsure
  - ☐ Prefer not to answer
-

Do you have any information on the costs associated with this solution or these solutions?

Note: We do not ask about any cost information in this survey.

- ☐ Yes
  - ☐ No
  - ☐ Unsure
  - ☐ Prefer not to answer
- 

Page Break

---

Thinking only about your project, how might the constraint related to "aversion to trying new land uses" be overcome or at least mitigated?

Please provide your answer in one to three sentences and identify the actors (who) and the activities (what) that you believe might address this constraint.

---

Page Break

---

Are any of these actions that you identified currently being taken, or are efforts underway to take these actions?

- ☐ Yes
  - ☐ No
  - ☐ Unsure
  - ☐ Prefer not to answer
-

Do you have any information on the costs associated with this solution or these solutions?

Note: We do not ask about any cost information in this survey.

- ☐ Yes
- ☐ No
- ☐ Unsure
- ☐ Prefer not to answer

---

Page Break

Thinking only about your project, how might the constraint related to "skepticism toward NCS or a lack of trust in NCS promoters" be overcome or at least mitigated?

Please provide your answer in one to three sentences and identify the actors (who) and the activities (what) that you believe might address this constraint.

---

---

Are any of these actions that you identified currently being taken, or are efforts underway to take these actions?

- ☐ Yes
  - ☐ No
  - ☐ Unsure
  - ☐ Prefer not to answer
-

Do you have any information on the costs associated with this solution or these solutions?

Note: We do not ask about any cost information in this survey.

- ☐ Yes
  - ☐ No
  - ☐ Unsure
  - ☐ Prefer not to answer
- 

Page Break

---

Thinking only about your project, how the constraint related to "social norms favoring non-NCS land uses" be overcome or at least mitigated?

Please provide your answer in one to three sentences and identify the actors (who) and the activities (what) that you believe might address this constraint.

---

---

Are any of these actions that you identified currently being taken, or are efforts underway to take these actions?

- ☐ Yes
  - ☐ No
  - ☐ Unsure
  - ☐ Prefer not to answer
-

Do you have any information on the costs associated with this solution or these solutions?

Note: We do not ask about any cost information in this survey.

- ☐ Yes
  - ☐ No
  - ☐ Unsure
  - ☐ Prefer not to answer
- 

Page Break

---

Thinking only about your project, how might the constraint related to "concerns over negative equity impacts of NCS" be overcome or at least mitigated?

Please provide your answer in one to three sentences and identify the actors (who) and the activities (what) that you believe might address this constraint.

---

---

Are any of these actions that you identified currently being taken, or are efforts underway to take these actions?

- ☐ Yes
  - ☐ No
  - ☐ Unsure
  - ☐ Prefer not to answer
-



Do you have any information on the costs associated with this solution or these solutions?

Note: We do not ask about any cost information in this survey.

- ☐ Yes
  - ☐ No
  - ☐ Unsure
  - ☐ Prefer not to answer
- 

Page Break

---

Thinking only about your project, how might the constraint related to "lack of opportunity to participate in or influence the implementation of NCS due to gender, race, ethnicity, or other dimensions of identity" be overcome or at least mitigated?

Please provide your answer in one to three sentences and identify the actors (who) and the activities (what) that you believe might address this constraint.

---

---

Are any of these actions that you identified currently being taken, or are efforts underway to take these actions?

- ☐ Yes
  - ☐ No
  - ☐ Unsure
  - ☐ Prefer not to answer
-

Do you have any information on the costs associated with this solution or these solutions?

Note: We do not ask about any cost information in this survey.

- ☐ Yes
  - ☐ No
  - ☐ Unsure
  - ☐ Prefer not to answer
- 

Page Break

---

Thinking only about your project, how the constraint related to "limited social learning or exchange networks for NCS" be overcome or at least mitigated?

Please provide your answer in one to three sentences and identify the actors (who) and the activities (what) that you believe might address this constraint.

---

---

Are any of these actions that you identified currently being taken, or are efforts underway to take these actions?

- ☐ Yes
  - ☐ No
  - ☐ Unsure
  - ☐ Prefer not to answer
-

Do you have any information on the costs associated with this solution or these solutions?

Note: We do not ask about any cost information in this survey.

- ☐ Yes
- ☐ No
- ☐ Unsure
- ☐ Prefer not to answer

---

Page Break

Thinking only about your project, how the constraint related to "difficulty identifying, engaging, or coordinating with relevant actors" be overcome or at least mitigated?

Please provide your answer in one to three sentences and identify the actors (who) and the activities (what) that you believe might address this constraint.

---

---

Are any of these actions that you identified currently being taken, or are efforts underway to take these actions?

- ☐ Yes
  - ☐ No
  - ☐ Unsure
  - ☐ Prefer not to answer
-

Do you have any information on the costs associated with this solution or these solutions?

Note: We do not ask about any cost information in this survey.

- ☐ Yes
  - ☐ No
  - ☐ Unsure
  - ☐ Prefer not to answer
- 

Page Break

---

Thinking only about your project, how might the constraint related to "insecure or uncertain rights to manage or sell property" be overcome or at least mitigated?

Please provide your answer in one to three sentences and identify the actors (who) and the activities (what) that you believe might address this constraint.

---

---

Are any of these actions that you identified currently being taken, or are efforts underway to take these actions?

- ☐ Yes
  - ☐ No
  - ☐ Unsure
  - ☐ Prefer not to answer
-

Do you have any information on the costs associated with this solution or these solutions?

Note: We do not ask about any cost information in this survey.

- ☐ Yes
  - ☐ No
  - ☐ Unsure
  - ☐ Prefer not to answer
- 

Page Break

---

Thinking only about your project, how might the constraint related to "insecure, uncertain, or lack of rights to use natural resources" be overcome or at least mitigated?

Please provide your answer in one to three sentences and identify the actors (who) and the activities (what) that you believe might address this constraint.

---

---

Are any of these actions that you identified currently being taken, or are efforts underway to take these actions?

- ☐ Yes
  - ☐ No
  - ☐ Unsure
  - ☐ Prefer not to answer
-

Do you have any information on the costs associated with this solution or these solutions?

Note: We do not ask about any cost information in this survey.

- ☐ Yes
  - ☐ No
  - ☐ Unsure
  - ☐ Prefer not to answer
- 

Page Break

---

Thinking only about your project, how might the constraint related to "regulatory barriers to production, transport, or sale of NCS outputs (for example, permits or licensing)" be overcome or at least mitigated?

Please provide your answer in one to three sentences and identify the actors (who) and the activities (what) that you believe might address this constraint.

---

---

Are any of these actions that you identified currently being taken, or are efforts underway to take these actions?

- ☐ Yes
  - ☐ No
  - ☐ Unsure
  - ☐ Prefer not to answer
-

Do you have any information on the costs associated with this solution or these solutions?

Note: We do not ask about any cost information in this survey.

- ☐ Yes
- ☐ No
- ☐ Unsure
- ☐ Prefer not to answer

---

Page Break

Thinking only about your project, how might the constraint related to "unsecure or uncertain NCS benefit sharing" be overcome or at least mitigated?

Please provide your answer in one to three sentences and identify the actors (who) and the activities (what) that you believe might address this constraint.

---

---

Are any of these actions that you identified currently being taken, or are efforts underway to take these actions?

- ☐ Yes
  - ☐ No
  - ☐ Unsure
  - ☐ Prefer not to answer
-

Do you have any information on the costs associated with this solution or these solutions?

Note: We do not ask about any cost information in this survey.

- ☐ Yes
- ☐ No
- ☐ Unsure
- ☐ Prefer not to answer

---

Page Break

Thinking only about your project, how might the constraint related to "NCS-related corruption" be overcome or at least mitigated?

Please provide your answer in one to three sentences and identify the actors (who) and the activities (what) that you believe might address this constraint.

---

---

Are any of these actions that you identified currently being taken, or are efforts underway to take these actions?

- ☐ Yes
  - ☐ No
  - ☐ Unsure
  - ☐ Prefer not to answer
-



Do you have any information on the costs associated with this solution or these solutions?

Note: We do not ask about any cost information in this survey.

- ☐ Yes
  - ☐ No
  - ☐ Unsure
  - ☐ Prefer not to answer
- 

Page Break

---

Thinking only about your project, how might the constraint related to "unclear laws and policies related to NCS outputs/markets" be overcome or at least mitigated?

Please provide your answer in one to three sentences and identify the actors (who) and the activities (what) that you believe might address this constraint.

---

---

Are any of these actions that you identified currently being taken, or are efforts underway to take these actions?

- ☐ Yes
  - ☐ No
  - ☐ Unsure
  - ☐ Prefer not to answer
-

Do you have any information on the costs associated with this solution or these solutions?

Note: We do not ask about any cost information in this survey.

- ☐ Yes
  - ☐ No
  - ☐ Unsure
  - ☐ Prefer not to answer
- 

Page Break

---

Thinking only about your project, how might the constraint related to "lack of policy coordination (for example, between sectors or between different administrative units)" be overcome or at least mitigated?

Please provide your answer in one to three sentences and identify the actors (who) and the activities (what) that you believe might address this constraint.

---

---

Are any of these actions that you identified currently being taken, or are efforts underway to take these actions?

- ☐ Yes
  - ☐ No
  - ☐ Unsure
  - ☐ Prefer not to answer
-

Do you have any information on the costs associated with this solution or these solutions?

Note: We do not ask about any cost information in this survey.

- ☐ Yes
- ☐ No
- ☐ Unsure
- ☐ Prefer not to answer

---

Page Break

Thinking only about your project, how might the constraint related to "uncertain enforcement of environmental laws" be overcome or at least mitigated?

Please provide your answer in one to three sentences and identify the actors (who) and the activities (what) that you believe might address this constraint.

---

---

Are any of these actions that you identified currently being taken, or are efforts underway to take these actions?

- ☐ Yes
  - ☐ No
  - ☐ Unsure
  - ☐ Prefer not to answer
-

Do you have any information on the costs associated with this solution or these solutions?

Note: We do not ask about any cost information in this survey.

- ☐ Yes
- ☐ No
- ☐ Unsure
- ☐ Prefer not to answer

---

Page Break

Thinking only about your project, how might the constraint related to "weak monitoring and enforcement of NCS agreements" be overcome or at least mitigated?

Please provide your answer in one to three sentences and identify the actors (who) and the activities (what) that you believe might address this constraint.

---

---

Are any of these actions that you identified currently being taken, or are efforts underway to take these actions?

- ☐ Yes
  - ☐ No
  - ☐ Unsure
  - ☐ Prefer not to answer
-

Do you have any information on the costs associated with this solution or these solutions?

Note: We do not ask about any cost information in this survey.

- ☐ Yes
- ☐ No
- ☐ Unsure
- ☐ Prefer not to answer

---

Page Break

Thinking only about your project, how might the constraint related to "violent conflict or the perceived threat of violence" be overcome or at least mitigated?

Please provide your answer in one to three sentences and identify the actors (who) and the activities (what) that you believe might address this constraint.

---

---

Are any of these actions that you identified currently being taken, or are efforts underway to take these actions?

- ☐ Yes
  - ☐ No
  - ☐ Unsure
  - ☐ Prefer not to answer
-

Do you have any information on the costs associated with this solution or these solutions?

Note: We do not ask about any cost information in this survey.

- ☐ Yes
- ☐ No
- ☐ Unsure
- ☐ Prefer not to answer

---

Page Break

Thinking only about your project, how might the constraint related to "lack of dispute resolution mechanisms" be overcome or at least mitigated?

Please provide your answer in one to three sentences and identify the actors (who) and the activities (what) that you believe might address this constraint.

---

---

Are any of these actions that you identified currently being taken, or are efforts underway to take these actions?

- ☐ Yes
  - ☐ No
  - ☐ Unsure
  - ☐ Prefer not to answer
-

Do you have any information on the costs associated with this solution or these solutions?

Note: We do not ask about any cost information in this survey.

- ☐ Yes
  - ☐ No
  - ☐ Unsure
  - ☐ Prefer not to answer
- 

Page Break

---

Thinking only about your project, how might the constraint related to "financial or other incentives for non-NCS (for example, subsidies, reduced taxes, access to credit or insurance)" be overcome or at least mitigated?

Please provide your answer in one to three sentences and identify the actors (who) and the activities (what) that you believe might address this constraint.

---

---

Are any of these actions that you identified currently being taken, or are efforts underway to take these actions?

- ☐ Yes
  - ☐ No
  - ☐ Unsure
  - ☐ Prefer not to answer
-

Do you have any information on the costs associated with this solution or these solutions?

Note: We do not ask about any cost information in this survey.

- ☐ Yes
  - ☐ No
  - ☐ Unsure
  - ☐ Prefer not to answer
- 

Page Break

---

Thinking only about your project, how might the constraint related to "politically influential interests favoring non-NCS" be overcome or at least mitigated?

Please provide your answer in one to three sentences and identify the actors (who) and the activities (what) that you believe might address this constraint.

---

---

Are any of these actions that you identified currently being taken, or are efforts underway to take these actions?

- ☐ Yes
  - ☐ No
  - ☐ Unsure
  - ☐ Prefer not to answer
-



Do you have any information on the costs associated with this solution or these solutions?

Note: We do not ask about any cost information in this survey.

- ☐ Yes
- ☐ No
- ☐ Unsure
- ☐ Prefer not to answer

---

Page Break

Thinking only about your project, how might the constraint related to "other constraint 1: *[respondent's write-in constraint 1]*" be overcome or at least mitigated?

Please provide your answer in one to three sentences and identify the actors (who) and the activities (what) that you believe might address this constraint.

---

---

Are any of these actions that you identified currently being taken, or are efforts underway to take these actions?

- ☐ Yes
  - ☐ No
  - ☐ Unsure
  - ☐ Prefer not to answer
-

Do you have any information on the costs associated with this solution or these solutions?

Note: We do not ask about any cost information in this survey.

- ☐ Yes
- ☐ No
- ☐ Unsure
- ☐ Prefer not to answer

---

Page Break

Thinking only about your project, how might the constraint related to "other constraint 2: *[respondent's write-in constraint 2]*" be overcome or at least mitigated?

Please provide your answer in one to three sentences and identify the actors (who) and the activities (what) that you believe might address this constraint.

---

---

Are any of these actions that you identified currently being taken, or are efforts underway to take these actions?

- ☐ Yes
  - ☐ No
  - ☐ Unsure
  - ☐ Prefer not to answer
-

Do you have any information on the costs associated with this solution or these solutions?

Note: We do not ask about any cost information in this survey.

- ☐ Yes
  - ☐ No
  - ☐ Unsure
  - ☐ Prefer not to answer
- 

Page Break

---

Thinking only about your project, how might the constraint related to "other constraint 3: *[respondent's write-in constraint 3]*" be overcome or at least mitigated?

Please provide your answer in one to three sentences and identify the actors (who) and the activities (what) that you believe might address this constraint.

---

---

Are any of these actions that you identified currently being taken, or are efforts underway to take these actions?

- ☐ Yes
  - ☐ No
  - ☐ Unsure
  - ☐ Prefer not to answer
-

Do you have any information on the costs associated with this solution or these solutions?

Note: We do not ask about any cost information in this survey.

- ☐ Yes
  - ☐ No
  - ☐ Unsure
  - ☐ Prefer not to answer
- 

Page Break

End of Block: Module 3: Solutions to Constraints

---

Start of Block: Module 4: Enabling Conditions

By how much do you think your project could increase in size in the next ten (10) years if key enabling conditions were fulfilled?

- ☐ None
  - ☐ Double in size (2x)
  - ☐ Triple in size (3x)
  - ☐ Quadruple in size (4x)
  - ☐ Quintuple in size or more ( $\geq 5x$ )
  - ☐ Unsure/prefer not to answer
- 

Please identify up to ten conditions that are most important for enabling your project to *[respondent's scale choice above]*, but that currently would prevent project scale-up.

An increase in project size may refer to implementing protection, restoration, or improved management across a greater area, or it may refer to working with more communities or individual land managers/operators. *The conditions you select below may already be fulfilled for your project at its current size, but by selecting them you indicate that they are not fulfilled for increasing your project's current size.*

Leave all other conditions unselected.

|                                                                                                                                             | Conditions of highest importance<br>for increasing current project size | Conditions not of highest<br>importance for increasing current<br>project size |
|---------------------------------------------------------------------------------------------------------------------------------------------|-------------------------------------------------------------------------|--------------------------------------------------------------------------------|
| Sufficient quantity and quality of,<br>or affordable cost of, planting stock<br>and other materials for NCS                                 | <input type="radio"/>                                                   | <input type="radio"/>                                                          |
| Sufficient quantity and quality of,<br>or affordable cost of, labor<br>(external or own) for NCS                                            | <input type="radio"/>                                                   | <input type="radio"/>                                                          |
| Sufficient quantity and quality of,<br>or affordable cost of, land for NCS                                                                  | <input type="radio"/>                                                   | <input type="radio"/>                                                          |
| Sufficient quantity and quality of,<br>or affordable cost of, water for NCS                                                                 | <input type="radio"/>                                                   | <input type="radio"/>                                                          |
| Availability of, or acceptable cost<br>of, credit for land<br>managers/operators to participate<br>in NCS                                   | <input type="radio"/>                                                   | <input type="radio"/>                                                          |
| Availability of, or acceptable cost<br>of, other funding for land<br>managers/operators to participate<br>in NCS                            | <input type="radio"/>                                                   | <input type="radio"/>                                                          |
| Availability of, or acceptable cost<br>of, insurance for land<br>managers/operators to implement<br>NCS                                     | <input type="radio"/>                                                   | <input type="radio"/>                                                          |
| Availability of, or acceptable cost<br>of, credit for NCS projects                                                                          | <input type="radio"/>                                                   | <input type="radio"/>                                                          |
| Availability of, or acceptable cost<br>of, other funding for NCS projects                                                                   | <input type="radio"/>                                                   | <input type="radio"/>                                                          |
| Strong donor/creditor relationships<br>or reporting                                                                                         | <input type="radio"/>                                                   | <input type="radio"/>                                                          |
| Availability of markets for NCS<br>outputs (for example, food or<br>wood, etc.) produced by the land<br>manager/operator                    | <input type="radio"/>                                                   | <input type="radio"/>                                                          |
| Availability of markets for carbon<br>sequestered by the NCS                                                                                | <input type="radio"/>                                                   | <input type="radio"/>                                                          |
| Availability of markets for<br>ecosystem services (for example,<br>water quality or flow regulation) or<br>biodiversity provided by the NCS | <input type="radio"/>                                                   | <input type="radio"/>                                                          |

|                                                                                                                                                                             |                       |                       |
|-----------------------------------------------------------------------------------------------------------------------------------------------------------------------------|-----------------------|-----------------------|
| Reasonable prices for NCS outputs<br>(for example, food or wood)<br>produced by the land<br>manager/operator                                                                | <input type="radio"/> | <input type="radio"/> |
| Reasonable prices for carbon<br>sequestered by the NCS                                                                                                                      | <input type="radio"/> | <input type="radio"/> |
| Reasonable prices for ecosystem<br>services (for example, water quality<br>or flow regulation) or biodiversity<br>provided by the NCS                                       | <input type="radio"/> | <input type="radio"/> |
| Profitability of NCS comparable to<br>that of alternative land uses (please<br>specify)                                                                                     | <input type="radio"/> | <input type="radio"/> |
| High levels of land<br>manager/operator literacy,<br>numeracy, or technological<br>capabilities                                                                             | <input type="radio"/> | <input type="radio"/> |
| Availability of, or reasonable cost<br>of, information about how to<br>design or begin the NCS                                                                              | <input type="radio"/> | <input type="radio"/> |
| Availability of, or reasonable cost<br>of, information about how to<br>manage the NCS (for example,<br>maintenance activities or other<br>inputs and their timing)          | <input type="radio"/> | <input type="radio"/> |
| Availability of, or reasonable cost<br>of, technical advice to land<br>operators (for example, extension<br>services)                                                       | <input type="radio"/> | <input type="radio"/> |
| Availability of, or reasonable cost<br>of, information about yields, inputs<br>and profits                                                                                  | <input type="radio"/> | <input type="radio"/> |
| Availability of, or reasonable cost<br>of, information about market<br>access or prices                                                                                     | <input type="radio"/> | <input type="radio"/> |
| Availability of, or reasonable cost<br>of, information about on-site<br>benefits of NCS (for example, soil<br>fertility, shade for livestock, or<br>income diversification) | <input type="radio"/> | <input type="radio"/> |
| Absence of preferences for non-<br>NCS land uses among key<br>decisionmakers                                                                                                | <input type="radio"/> | <input type="radio"/> |

|                                                                                                                                                      |                       |                       |
|------------------------------------------------------------------------------------------------------------------------------------------------------|-----------------------|-----------------------|
| No aversion to trying new land uses among key decisionmakers                                                                                         | <input type="radio"/> | <input type="radio"/> |
| No skepticism toward NCS or lack of trust in NCS promoters                                                                                           | <input type="radio"/> | <input type="radio"/> |
| Absence of social norms that favor non-NCS land uses                                                                                                 | <input type="radio"/> | <input type="radio"/> |
| Ways to address negative equity impacts of NCS                                                                                                       | <input type="radio"/> | <input type="radio"/> |
| Opportunity to participate in, or influence the implementation of NCS for people of all genders, races, ethnicities, or other dimensions of identity | <input type="radio"/> | <input type="radio"/> |
| Available social learning or exchange networks for NCS                                                                                               | <input type="radio"/> | <input type="radio"/> |
| Ability to identify, engage, or coordinate with relevant actors                                                                                      | <input type="radio"/> | <input type="radio"/> |
| Secure or certain rights to manage or sell property                                                                                                  | <input type="radio"/> | <input type="radio"/> |
| Secure or certain rights to use natural resources                                                                                                    | <input type="radio"/> | <input type="radio"/> |
| Absence of, or low regulatory barriers to production, transport or sale of NCS outputs (for example, permits or licensing requirements)              | <input type="radio"/> | <input type="radio"/> |
| Secure or certain NCS benefit sharing                                                                                                                | <input type="radio"/> | <input type="radio"/> |
| Absence of NCS-related corruption                                                                                                                    | <input type="radio"/> | <input type="radio"/> |
| Clear laws and policies related to NCS outputs/markets                                                                                               | <input type="radio"/> | <input type="radio"/> |
| Effective policy coordination (for example, between sectors or between different administrative units)                                               | <input type="radio"/> | <input type="radio"/> |
| Reliable enforcement of environmental laws                                                                                                           | <input type="radio"/> | <input type="radio"/> |

|                                                                                                                             |                       |                       |
|-----------------------------------------------------------------------------------------------------------------------------|-----------------------|-----------------------|
| Reliable monitoring and enforcement of NCS agreements                                                                       | <input type="radio"/> | <input type="radio"/> |
| Absence of violent conflict or the perceived threat of violence                                                             | <input type="radio"/> | <input type="radio"/> |
| Availability of dispute resolution mechanisms                                                                               | <input type="radio"/> | <input type="radio"/> |
| Absence of financial or other incentives for non-NCS (for example, subsidies, reduced taxes, access to credit or insurance) | <input type="radio"/> | <input type="radio"/> |
| Absence of politically influential interests favoring non-NCS                                                               | <input type="radio"/> | <input type="radio"/> |
| Other enabling conditions (please specify)                                                                                  | <input type="radio"/> | <input type="radio"/> |
| Other enabling conditions (please specify)                                                                                  | <input type="radio"/> | <input type="radio"/> |
| Other enabling conditions (please specify)                                                                                  | <input type="radio"/> | <input type="radio"/> |

End of Block: Module 4: Enabling Conditions

Start of Block: Module 5

These are the final two questions for this survey.

If you have anything you would like to add, please use the space below.

---

-----

If you would like to receive information about the results of this survey and related research, please enter your email below.

---

End of Block: Module
